# Supplementary material for: Synthesis of fused tricyclic systems by thermal Cope rearrangement of furan-substituted vinyl cyclopropanes
Source: Royal Society of Chemistry journal article supplement (doi:10.1039/c8ob00924d), 2018-01-01

# Synthesis of Fused Tricyclic Systems by Rearrangement of Furan-Substituted Vinyl Cyclopropanes

Verena Klaus, Stéphane Wittmann, Hans M. Senn and J. Stephen Clark\*

*WestCHEM, School of Chemistry, Joseph Black Building, University of Glasgow,  
University Avenue, Glasgow G12 8QQ, United Kingdom*

\* Corresponding author: [stephen.clark@glasgow.ac.uk](mailto:stephen.clark@glasgow.ac.uk)

## Supporting Information

### Table of Contents

|                                                                                                                      |     |
|----------------------------------------------------------------------------------------------------------------------|-----|
| Computational Information                                                                                            | S3  |
| NMR Spectra                                                                                                          | S9  |
| <sup>1</sup> H NMR spectrum of ( <i>E</i> )-1-( <i>t</i> -butyldimethylsilyloxy)-2-octen-7-yne (CDCl <sub>3</sub> )  | S9  |
| <sup>13</sup> C NMR spectrum of ( <i>E</i> )-1-( <i>t</i> -butyldimethylsilyloxy)-2-octen-7-yne (CDCl <sub>3</sub> ) | S10 |
| <sup>1</sup> H NMR spectrum of <b>20</b> (500 MHz, CDCl <sub>3</sub> )                                               | S11 |
| <sup>13</sup> C NMR spectrum of <b>20</b> (126 MHz, CDCl <sub>3</sub> )                                              | S12 |
| <sup>1</sup> H NMR spectrum of <b>21</b> (500 MHz, CDCl <sub>3</sub> )                                               | S13 |
| <sup>13</sup> C NMR spectrum of <b>21</b> (126 MHz, CDCl <sub>3</sub> )                                              | S14 |
| <sup>1</sup> H NMR spectrum of <b>22</b> (500 MHz, CDCl <sub>3</sub> )                                               | S15 |
| <sup>13</sup> C NMR spectrum of <b>22</b> (126 MHz, CDCl <sub>3</sub> )                                              | S16 |
| <sup>1</sup> H NMR spectrum of <b>23</b> (400 MHz, CDCl <sub>3</sub> )                                               | S17 |
| <sup>13</sup> C NMR spectrum of <b>23</b> (101 MHz, CDCl <sub>3</sub> )                                              | S18 |
| <sup>1</sup> H NMR spectrum of <b>24</b> (400 MHz, CDCl <sub>3</sub> )                                               | S19 |
| <sup>13</sup> C NMR spectrum of <b>24</b> (126 MHz, CDCl <sub>3</sub> )                                              | S20 |
| <sup>1</sup> H NMR spectrum of <b>25</b> (400 MHz, C <sub>6</sub> D <sub>6</sub> )                                   | S21 |
| <sup>13</sup> C NMR spectrum of <b>25</b> (126 MHz, C <sub>6</sub> D <sub>6</sub> )                                  | S22 |
| <sup>1</sup> H NMR spectrum of <b>26</b> (400 MHz, C <sub>6</sub> D <sub>6</sub> )                                   | S23 |
| <sup>13</sup> C NMR spectrum of <b>26</b> (101 MHz, C <sub>6</sub> D <sub>6</sub> )                                  | S24 |
| <sup>1</sup> H NMR spectrum of <b>27</b> (400 MHz, C <sub>6</sub> D <sub>6</sub> )                                   | S25 |
| <sup>13</sup> C NMR spectrum of <b>27</b> (101 MHz, C <sub>6</sub> D <sub>6</sub> )                                  | S26 |
| <sup>1</sup> H NMR spectrum of <b>28</b> (400 MHz, C <sub>6</sub> D <sub>6</sub> )                                   | S27 |
| <sup>13</sup> C NMR spectrum of <b>28</b> (126 MHz, C <sub>6</sub> D <sub>6</sub> )                                  | S28 |

|                                                                              |     |
|------------------------------------------------------------------------------|-----|
| $^1\text{H}$ NMR spectrum of <b>29</b> (400 MHz, $\text{C}_6\text{D}_6$ )    | S29 |
| $^{13}\text{C}$ NMR spectrum of <b>29</b> (101 MHz, $\text{C}_6\text{D}_6$ ) | S30 |
| $^1\text{H}$ NMR spectrum of <b>30</b> (400 MHz, $\text{C}_6\text{D}_6$ )    | S31 |
| $^{13}\text{C}$ NMR spectrum of <b>30</b> (101 MHz, $\text{C}_6\text{D}_6$ ) | S32 |
| $^1\text{H}$ NMR spectrum of <b>31</b> (400 MHz, $\text{C}_6\text{D}_6$ )    | S33 |
| $^{13}\text{C}$ NMR spectrum of <b>31</b> (126 MHz, $\text{C}_6\text{D}_6$ ) | S34 |
| $^1\text{H}$ NMR spectrum of <b>33</b> (500 MHz, $\text{CDCl}_3$ )           | S35 |
| $^{13}\text{C}$ NMR spectrum of <b>33</b> (126 MHz, $\text{CDCl}_3$ )        | S36 |
| $^1\text{H}$ NMR spectrum of <b>35</b> (400 MHz, $\text{CDCl}_3$ )           | S37 |
| $^{13}\text{C}$ NMR spectrum of <b>35</b> (101 MHz, $\text{CDCl}_3$ )        | S38 |
| $^1\text{H}$ NMR spectrum of <b>36</b> (400 MHz, $\text{C}_6\text{D}_6$ )    | S39 |
| $^{13}\text{C}$ NMR spectrum of <b>36</b> (101 MHz, $\text{C}_6\text{D}_6$ ) | S40 |
| $^1\text{H}$ NMR spectrum of <b>37</b> (400 MHz, $\text{C}_6\text{D}_6$ )    | S41 |
| $^{13}\text{C}$ NMR spectrum of <b>37</b> (101 MHz, $\text{C}_6\text{D}_6$ ) | S42 |

## Computational Information

All calculations were performed with the programme Gaussian 09<sup>1</sup> at the density-functional level of theory. The M06-2X exchange-correlation functional<sup>2</sup> was used throughout, which yields reliable reaction energies and barriers for main-group chemistry<sup>3,4</sup> and is able to account for dispersive interactions; it was recently applied with good success to calculate the thermochemistry of [3,3]-rearrangements in 1,2-arylvinylcyclopropanes.<sup>5</sup> M06-2X is a hybrid meta-GGA with 54% global exact-exchange admixture. All reported results were obtained with the def2-TZVP basis set.<sup>6</sup> Structures were freely optimised to default tolerances and stationary points characterised by the presence of zero (minima) or one (transition states) negative eigenvalues in the analytically computed Hessian. Suitable starting structures for transition-state optimisations were obtained from scans along the C<sup>1</sup>–C<sup>6</sup> distance; transition states were verified to be connected to the respective minima by following the IRC. Gibbs free energies were calculated using the standard ideal-gas/rigid-rotor/harmonic-oscillator (RRHO) approximation. For the reactions under study, the RRHO is expected to perform well, given the rigidity of the structures, the intramolecular nature of the reactions, and the focus on relative differences (*i.e.*,  $\Delta\Delta G$  values) between highly similar cases. Solvent effects were not taken into account in the calculations, which is justified given the low polarity of the experimentally used solvents (toluene or benzene). Images were created with Jmol.<sup>7</sup>

1. Frisch, M. J.; Trucks, G. W.; Schlegel, H. B.; Scuseria, G. E.; Robb, M. A.; Cheeseman, J. R.; Scalmani, G.; Barone, V.; Mennucci, B.; Petersson, G. A.; Nakatsuji, H.; Caricato, M.; Li, X.; Hratchian, H. P.; Izmaylov, A. F.; Bloino, J.; Zheng, G.; Sonnenberg, J. L.; Hada, M.; Ehara, M.; Toyota, K.; Fukuda, R.; Hasegawa, J.; Ishida, M.; Nakajima, T.; Honda, Y.; Kitao, O.; Nakai, H.; Vreven, T.; Montgomery, J. A., Jr.; Peralta, J. E.; Ogliaro, F.; Bearpark, M.; Heyd, J. J.; Brothers, E.; Kudin, K. N.; Staroverov, V. N.; Kobayashi, R.; Normand, J.; Raghavachari, K.; Rendell, A.; Burant, J. C.; Iyengar, S. S.; Tomasi, J.; Cossi, M.; Rega, N.; Millam, N. J.; Klene, M.; Knox, J. E.; Cross, J. B.; Bakken, V.; Adamo, C.; Jaramillo, J.; Gomperts, R.; Stratmann, R. E.; Yazyev, O.; Austin, A. J.; Cammi, R.; Pomelli, C.; Ochterski, J. W.; Martin, R. L.; Morokuma, K.; Zakrzewski, V. G.; Voth, G. A.; Salvador, P.; Dannenberg, J. J.; Dapprich, S.; Daniels, A. D.; Farkas, Ö.; Foresman, J. B.; Ortiz, J. V.; Cioslowski, J.; Fox, D. J. *Gaussian 09*, Revision D.01; Gaussian, Inc.: Wallingford, CT, 2013.
2. Zhao, Y.; Truhlar, D. G. *Theor. Chem. Acc.* **2008**, *120*, 215–241.

- Zhao, Y.; Truhlar, D. G. *Acc. Chem. Res.* **2008**, *41*, 157–167.
- Zhao, Y.; Truhlar, D. G. *J. Chem. Theory Comput.* **2011**, *7*, 669–676.
- Orr, D.; Percy, J. M.; Harrison, Z. A. *Chem. Sci.* **2016**, *7*, 6369–6380.
- Weigend, F.; Ahlrichs, R. *Phys. Chem. Chem. Phys.* **2005**, *7*, 3297–3305.
- JMol*, v. 14.13.1, an open-source Java viewer for chemical structures in 3D, 2017.  
<http://www.jmol.org/>.

## Absolute energies

Calculated with M06-2X/def2-TZVP. Finite-temperature contributions for  $T = 313.15$  K,  $p = 100$  kPa. For TS structures, the frequency of the transition mode is also indicated.

|               | $E / E_h$  | $G / E_h$  | $E_{ZPV} / E_h$ | $S / (\text{cal mol}^{-1})$ | $\nu^\ddagger / \text{cm}^{-1}$ |
|---------------|------------|------------|-----------------|-----------------------------|---------------------------------|
| <b>E-25</b>   | -772.10113 | -771.82911 | 0.32485         | 148.0                       |                                 |
| <b>29</b>     | -772.10995 | -771.82936 | 0.32791         | 133.8                       |                                 |
| <b>TS E</b>   | -772.05987 | -771.78184 | 0.32474         | 132.8                       | 460i                            |
| <b>Z-29</b>   | -772.09939 | -771.82534 | 0.32530         | 144.2                       |                                 |
| <b>epi-29</b> | -772.10232 | -771.82143 | 0.32797         | 133.1                       |                                 |
| <b>TS Z</b>   | -772.05319 | -771.77513 | 0.32484         | 132.9                       | 460i                            |

## Cartesian coordinates of stationary points

In Xmol xyz format.

### Reactant E-25

```

C -0.423056 2.427349 0.775380
C 0.936438 2.295869 0.204625
C 1.375152 0.982178 -0.450101
C 2.001997 1.450042 0.830976
H 1.276177 3.182940 -0.318545
C -0.872438 1.881419 1.898464
C -2.278904 2.002911 2.392571
H -0.198715 1.295046 2.516552
H -1.116272 3.011017 0.174005
H -2.882099 2.610388 1.717768
H -2.309119 2.457464 3.385386
H -2.745288 1.018690 2.479530
C 2.413121 1.109353 -1.557598
C 0.446542 -0.148063 -0.473049
H 1.770020 0.947815 1.760223
C 3.443846 1.821049 0.539122
O -0.373988 -0.235586 -1.567585
C 0.164628 -1.155641 0.376209
C -0.896850 -1.915890 -0.222914
C -1.181326 -1.303918 -1.411199
H 0.631040 -1.365701 1.323493
C -1.492755 -3.114494 0.389569
C -2.126927 -1.555740 -2.532278
C 3.491196 2.042246 -0.982438
H 4.087355 0.984718 0.821397
H 3.778345 2.697920 1.095586
H 4.476507 1.836942 -1.398859
H 3.259073 3.080646 -1.219480
H 1.989840 1.480620 -2.492104
H 2.828056 0.117364 -1.752894

```

|   |           |           |           |
|---|-----------|-----------|-----------|
| H | -2.174798 | -0.667703 | -3.159825 |
| H | -3.127712 | -1.778383 | -2.168118 |
| H | -1.798825 | -2.393500 | -3.151064 |
| O | -1.099214 | -3.509658 | 1.463825  |
| C | -2.601741 | -3.834820 | -0.339707 |
| H | -2.309226 | -4.074176 | -1.362753 |
| H | -3.488456 | -3.199366 | -0.387832 |
| H | -2.841358 | -4.745952 | 0.201900  |

### Reactant Z-25

|   |           |           |           |
|---|-----------|-----------|-----------|
| C | -0.613014 | 2.008973  | 1.094938  |
| C | 0.717498  | 2.008934  | 0.423975  |
| C | 1.141830  | 0.800774  | -0.384802 |
| C | 1.806547  | 1.102478  | 0.928915  |
| H | 1.031645  | 2.970353  | 0.027920  |
| C | -0.837161 | 2.461008  | 2.323652  |
| C | 2.158508  | 1.056838  | -1.490284 |
| C | 0.211714  | -0.322349 | -0.532578 |
| H | 1.573570  | 0.508816  | 1.803619  |
| C | 3.242343  | 1.499154  | 0.651926  |
| O | -0.596353 | -0.291140 | -1.640736 |
| C | -0.073081 | -1.420795 | 0.194355  |
| C | -1.119757 | -2.116796 | -0.501592 |
| C | -1.394785 | -1.378264 | -1.617600 |
| H | 0.381335  | -1.732111 | 1.118999  |
| C | -1.706232 | -3.386687 | -0.040446 |
| C | -2.322502 | -1.509228 | -2.773673 |
| C | 3.251588  | 1.912580  | -0.829604 |
| H | 3.886716  | 0.631220  | 0.809868  |
| H | 3.598328  | 2.296967  | 1.306761  |
| H | 4.225623  | 1.767514  | -1.294845 |
| H | 3.010604  | 2.971673  | -0.924161 |
| H | 1.717969  | 1.538036  | -2.364660 |
| H | 2.566219  | 0.094903  | -1.810802 |
| H | -1.974927 | -2.265589 | -3.480420 |
| H | -2.373415 | -0.555203 | -3.295230 |
| H | -3.325007 | -1.784430 | -2.452984 |
| O | -1.314105 | -3.903223 | 0.981065  |
| C | -2.801784 | -4.026255 | -0.859810 |
| H | -2.500937 | -4.132976 | -1.902669 |
| H | -3.697303 | -3.401884 | -0.834332 |
| H | -3.031002 | -5.000565 | -0.436598 |
| C | 0.192782  | 3.032782  | 3.246373  |
| H | 1.186600  | 3.018502  | 2.801288  |
| H | 0.224478  | 2.475138  | 4.185332  |
| H | -0.053594 | 4.066178  | 3.501828  |
| H | -1.853504 | 2.423801  | 2.703870  |
| H | -1.449645 | 1.621551  | 0.520925  |

### Product 29

|   |           |           |           |
|---|-----------|-----------|-----------|
| C | 0.112490  | 1.751301  | 1.941675  |
| C | 1.386243  | 1.983688  | 1.635953  |
| C | 1.615419  | 0.730035  | -0.576039 |
| C | 2.297769  | 1.256979  | 0.674760  |
| H | 1.870784  | 2.793540  | 2.175921  |
| C | -0.864453 | 0.721878  | 1.431348  |
| C | -1.914926 | 1.410332  | 0.554650  |
| H | -1.375119 | 0.309826  | 2.305624  |
| H | -0.329255 | 2.421656  | 2.675281  |
| H | -1.468444 | 1.751229  | -0.382803 |
| H | -2.322508 | 2.283193  | 1.065831  |
| H | -2.741820 | 0.737278  | 0.324884  |
| C | 2.263503  | 1.294850  | -1.810967 |
| C | 0.552708  | -0.045859 | -0.504846 |

|   |           |           |           |
|---|-----------|-----------|-----------|
| H | 2.757008  | 0.426617  | 1.224567  |
| C | 3.410785  | 2.166519  | 0.102597  |
| O | -0.080929 | -0.551537 | -1.637708 |
| C | -0.200849 | -0.476633 | 0.719408  |
| C | -1.186750 | -1.451378 | 0.111735  |
| C | -1.063492 | -1.399539 | -1.228104 |
| H | 0.454128  | -0.974328 | 1.440978  |
| C | -2.065113 | -2.256119 | 0.962541  |
| C | -1.743835 | -2.055755 | -2.372969 |
| C | 2.900341  | 2.584208  | -1.277798 |
| H | 4.329988  | 1.588204  | -0.014910 |
| H | 3.633534  | 3.009700  | 0.756382  |
| H | 3.683781  | 2.979014  | -1.924019 |
| H | 2.128744  | 3.350931  | -1.169992 |
| H | 1.551218  | 1.451707  | -2.620273 |
| H | 3.043103  | 0.620673  | -2.181697 |
| H | -2.042236 | -1.287898 | -3.088087 |
| H | -2.615425 | -2.623850 | -2.073603 |
| H | -1.039185 | -2.717096 | -2.880973 |
| O | -1.991440 | -2.139442 | 2.169906  |
| C | -3.049674 | -3.234170 | 0.362733  |
| H | -2.545772 | -3.945996 | -0.291727 |
| H | -3.804367 | -2.706630 | -0.223216 |
| H | -3.535505 | -3.766461 | 1.176313  |

**Product epi-29**

|   |           |           |           |
|---|-----------|-----------|-----------|
| C | -0.322639 | 2.086727  | 1.185932  |
| C | 0.904553  | 2.481647  | 0.867230  |
| C | 1.667083  | 0.704866  | -0.645826 |
| C | 2.053243  | 1.549252  | 0.556332  |
| H | 1.102115  | 3.546299  | 0.774433  |
| C | -0.796242 | 0.680815  | 1.469644  |
| C | 2.485556  | 1.093789  | -1.848011 |
| C | 0.638542  | -0.116649 | -0.589365 |
| H | 2.269649  | 0.926825  | 1.430640  |
| C | 3.307735  | 2.291378  | 0.068820  |
| O | 0.175264  | -0.771386 | -1.728183 |
| C | -0.218297 | -0.487147 | 0.594537  |
| C | -1.267077 | -1.346103 | -0.096098 |
| C | -0.949887 | -1.451961 | -1.401764 |
| H | 0.368912  | -1.122409 | 1.269588  |
| C | -2.339585 | -1.994461 | 0.660017  |
| C | -1.532308 | -2.147163 | -2.577919 |
| C | 3.079037  | 2.448448  | -1.438523 |
| H | 4.190485  | 1.670816  | 0.239660  |
| H | 3.459049  | 3.238812  | 0.586880  |
| H | 3.986808  | 2.702222  | -1.984828 |
| H | 2.345308  | 3.238124  | -1.619116 |
| H | 1.893299  | 1.128985  | -2.762153 |
| H | 3.288662  | 0.366815  | -2.006530 |
| H | -0.776978 | -2.806693 | -3.008257 |
| H | -1.783548 | -1.404080 | -3.337016 |
| H | -2.415082 | -2.724344 | -2.337638 |
| O | -2.353272 | -1.908776 | 1.872406  |
| C | -3.433676 | -2.770420 | -0.039278 |
| H | -3.029550 | -3.679486 | -0.487686 |
| H | -3.900830 | -2.177633 | -0.825749 |
| H | -4.176784 | -3.044724 | 0.704996  |
| C | -0.537090 | 0.400353  | 2.957580  |
| H | 0.535694  | 0.441331  | 3.158882  |
| H | -0.920081 | -0.581350 | 3.229736  |
| H | -1.019637 | 1.154940  | 3.579999  |
| H | -1.877712 | 0.670013  | 1.320403  |
| H | -1.070906 | 2.855156  | 1.355990  |

**Transition state E**

|   |           |           |           |
|---|-----------|-----------|-----------|
| C | -0.026851 | 0.880384  | 2.522387  |
| C | 1.264471  | 1.110213  | 2.095085  |
| C | 1.997752  | -0.505333 | 1.132154  |
| C | 2.431908  | 0.222499  | 2.370794  |
| H | 1.448751  | 1.955393  | 1.443511  |
| C | -0.397246 | -0.202795 | 3.316226  |
| C | -1.843469 | -0.439052 | 3.650480  |
| H | 0.313366  | -0.516671 | 4.069409  |
| H | -0.815191 | 1.463135  | 2.053025  |
| H | -2.452196 | -0.433777 | 2.743302  |
| H | -2.221458 | 0.348343  | 4.308532  |
| H | -1.984212 | -1.396170 | 4.147975  |
| C | 2.819015  | -0.058526 | -0.051477 |
| C | 1.014662  | -1.454693 | 1.141540  |
| H | 2.392494  | -0.324997 | 3.310413  |
| C | 3.790172  | 0.820228  | 2.018451  |
| O | 0.378292  | -1.782984 | -0.049028 |
| C | 0.264321  | -1.967604 | 2.214657  |
| C | -0.811069 | -2.725577 | 1.589182  |
| C | -0.695173 | -2.543942 | 0.244667  |
| H | 0.708808  | -2.302607 | 3.136248  |
| C | -1.718009 | -3.598333 | 2.342051  |
| C | -1.451837 | -3.021690 | -0.943898 |
| C | 3.730076  | 1.055491  | 0.499016  |
| H | 4.567410  | 0.090776  | 2.255371  |
| H | 4.003280  | 1.732199  | 2.577201  |
| H | 4.718686  | 1.040900  | 0.042726  |
| H | 3.298491  | 2.033230  | 0.284795  |
| H | 2.211340  | 0.271493  | -0.894737 |
| H | 3.412483  | -0.907822 | -0.401409 |
| H | -1.250079 | -2.358724 | -1.783305 |
| H | -2.521853 | -3.039827 | -0.756238 |
| H | -1.137536 | -4.029111 | -1.226120 |
| O | -1.582910 | -3.725424 | 3.541523  |
| C | -2.807083 | -4.350778 | 1.613876  |
| H | -2.400473 | -4.929891 | 0.784142  |
| H | -3.537456 | -3.648982 | 1.205799  |
| H | -3.300894 | -5.013485 | 2.319595  |

**Transition state Z**

|   |           |           |           |
|---|-----------|-----------|-----------|
| C | -0.032262 | 0.895179  | 2.445828  |
| C | 1.282949  | 1.131184  | 2.075472  |
| C | 2.008915  | -0.426070 | 1.067367  |
| C | 2.472094  | 0.259554  | 2.316656  |
| H | 1.466759  | 1.984163  | 1.433378  |
| C | -0.496385 | -0.149175 | 3.240482  |
| C | 2.807480  | 0.046936  | -0.121478 |
| C | 1.049659  | -1.407555 | 1.074094  |
| H | 2.478756  | -0.330455 | 3.226576  |
| C | 3.812082  | 0.888751  | 1.946459  |
| O | 0.443577  | -1.778999 | -0.117521 |
| C | 0.303515  | -1.916278 | 2.142049  |
| C | -0.745006 | -2.710777 | 1.525237  |
| C | -0.613225 | -2.565521 | 0.178159  |
| H | 0.732243  | -2.174516 | 3.094811  |
| C | -1.723210 | -3.462080 | 2.316486  |
| C | -1.342958 | -3.085179 | -1.008275 |
| C | 3.720603  | 1.156495  | 0.434338  |
| H | 4.605208  | 0.166682  | 2.151313  |
| H | 4.022310  | 1.791557  | 2.521012  |
| H | 4.701080  | 1.157361  | -0.039562 |

|   |           |           |           |
|---|-----------|-----------|-----------|
| H | 3.280612  | 2.135869  | 0.246954  |
| H | 2.181584  | 0.386519  | -0.947495 |
| H | 3.400330  | -0.791838 | -0.497525 |
| H | -0.917030 | -4.036554 | -1.335922 |
| H | -1.245480 | -2.374700 | -1.827788 |
| H | -2.396916 | -3.237962 | -0.796441 |
| O | -1.716679 | -3.365583 | 3.526741  |
| C | -2.732156 | -4.348468 | 1.625118  |
| H | -2.259620 | -4.983224 | 0.875447  |
| H | -3.479698 | -3.731644 | 1.121414  |
| H | -3.228418 | -4.959567 | 2.374562  |
| C | 0.062051  | -0.525757 | 4.588119  |
| H | 1.147864  | -0.479212 | 4.640855  |
| H | -0.268123 | -1.525661 | 4.872590  |
| H | -0.320552 | 0.176221  | 5.333473  |
| H | -1.566645 | -0.329213 | 3.181304  |
| H | -0.774367 | 1.433076  | 1.862356  |



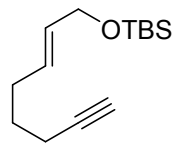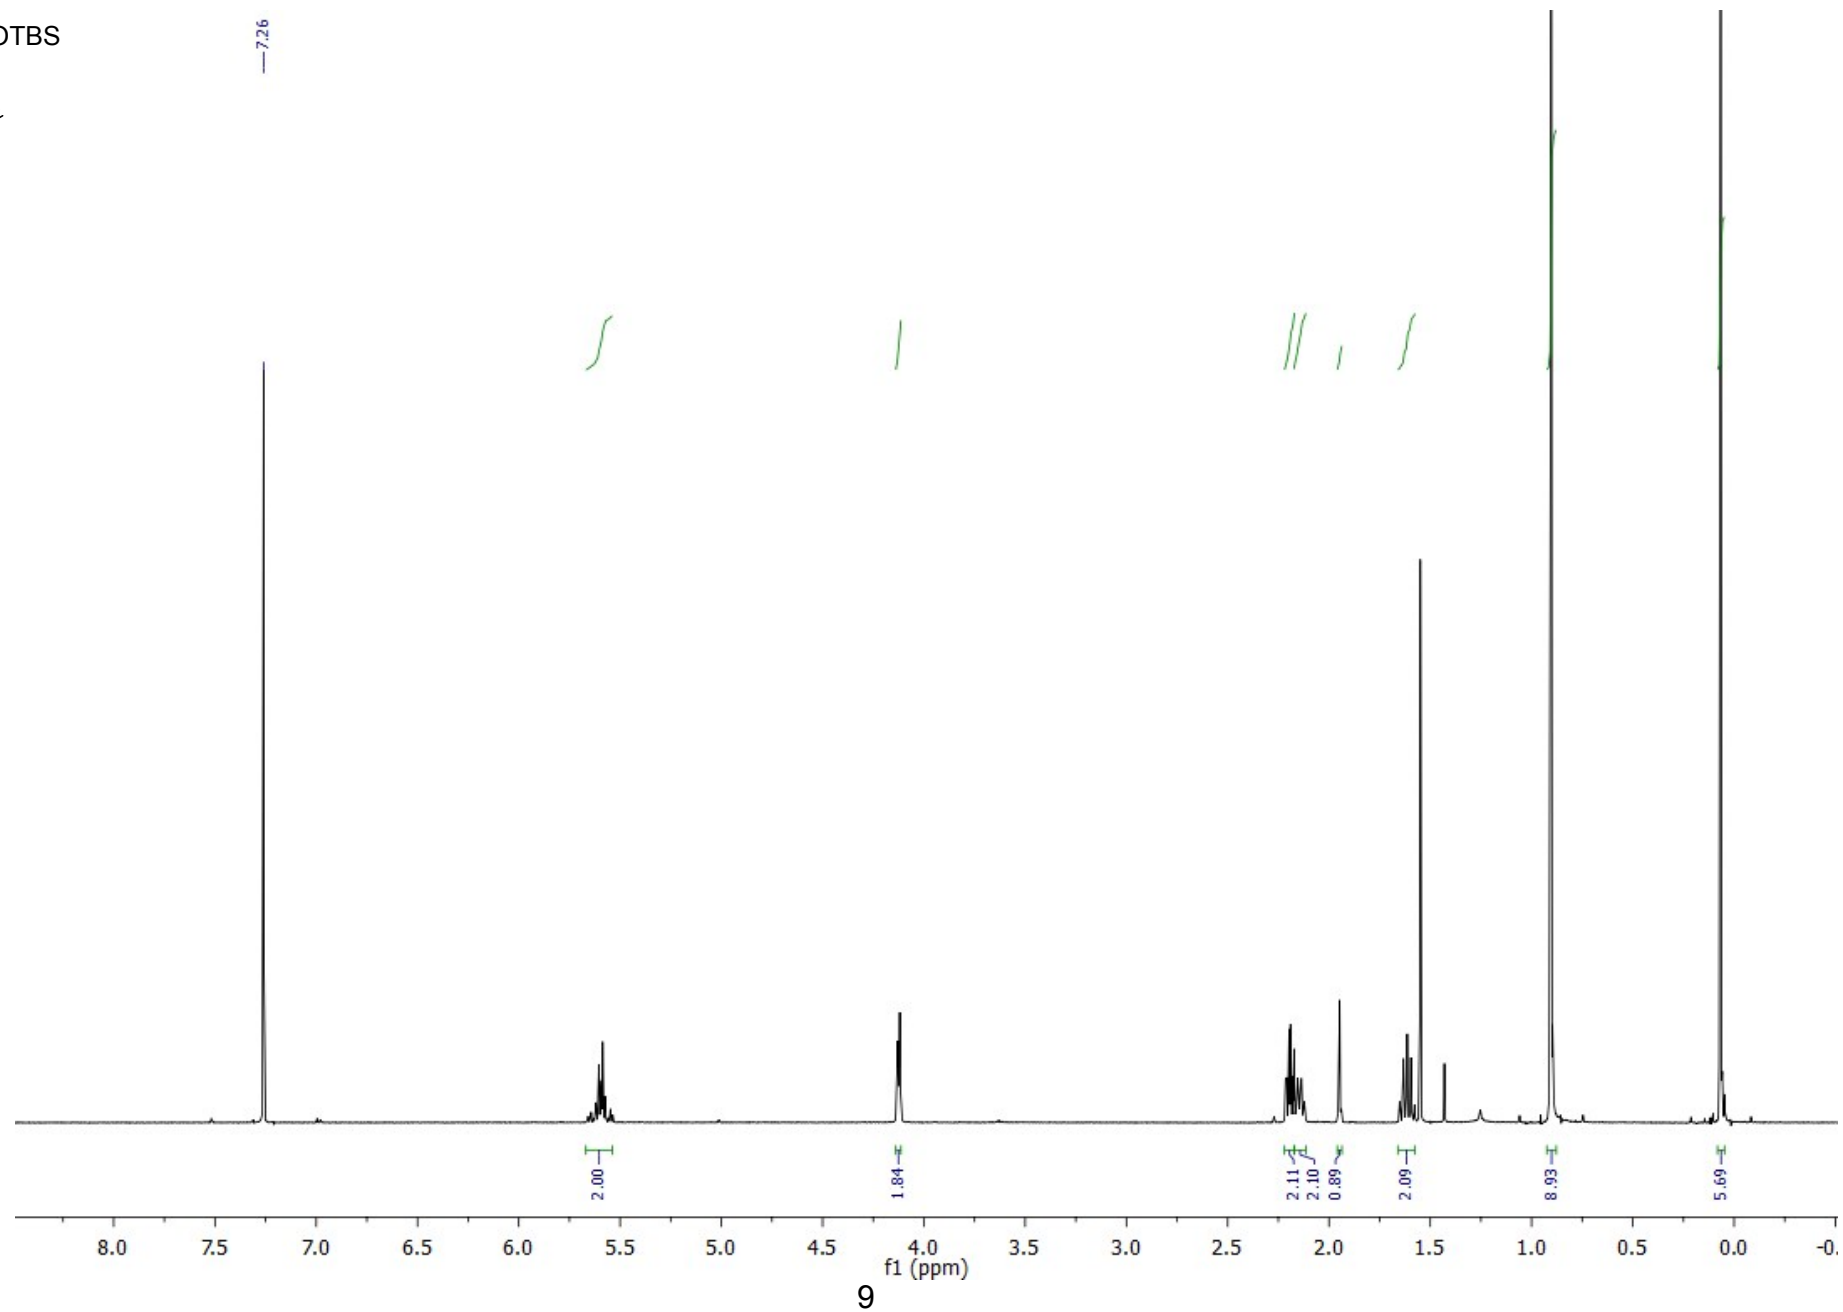

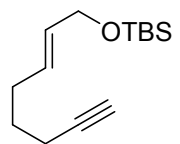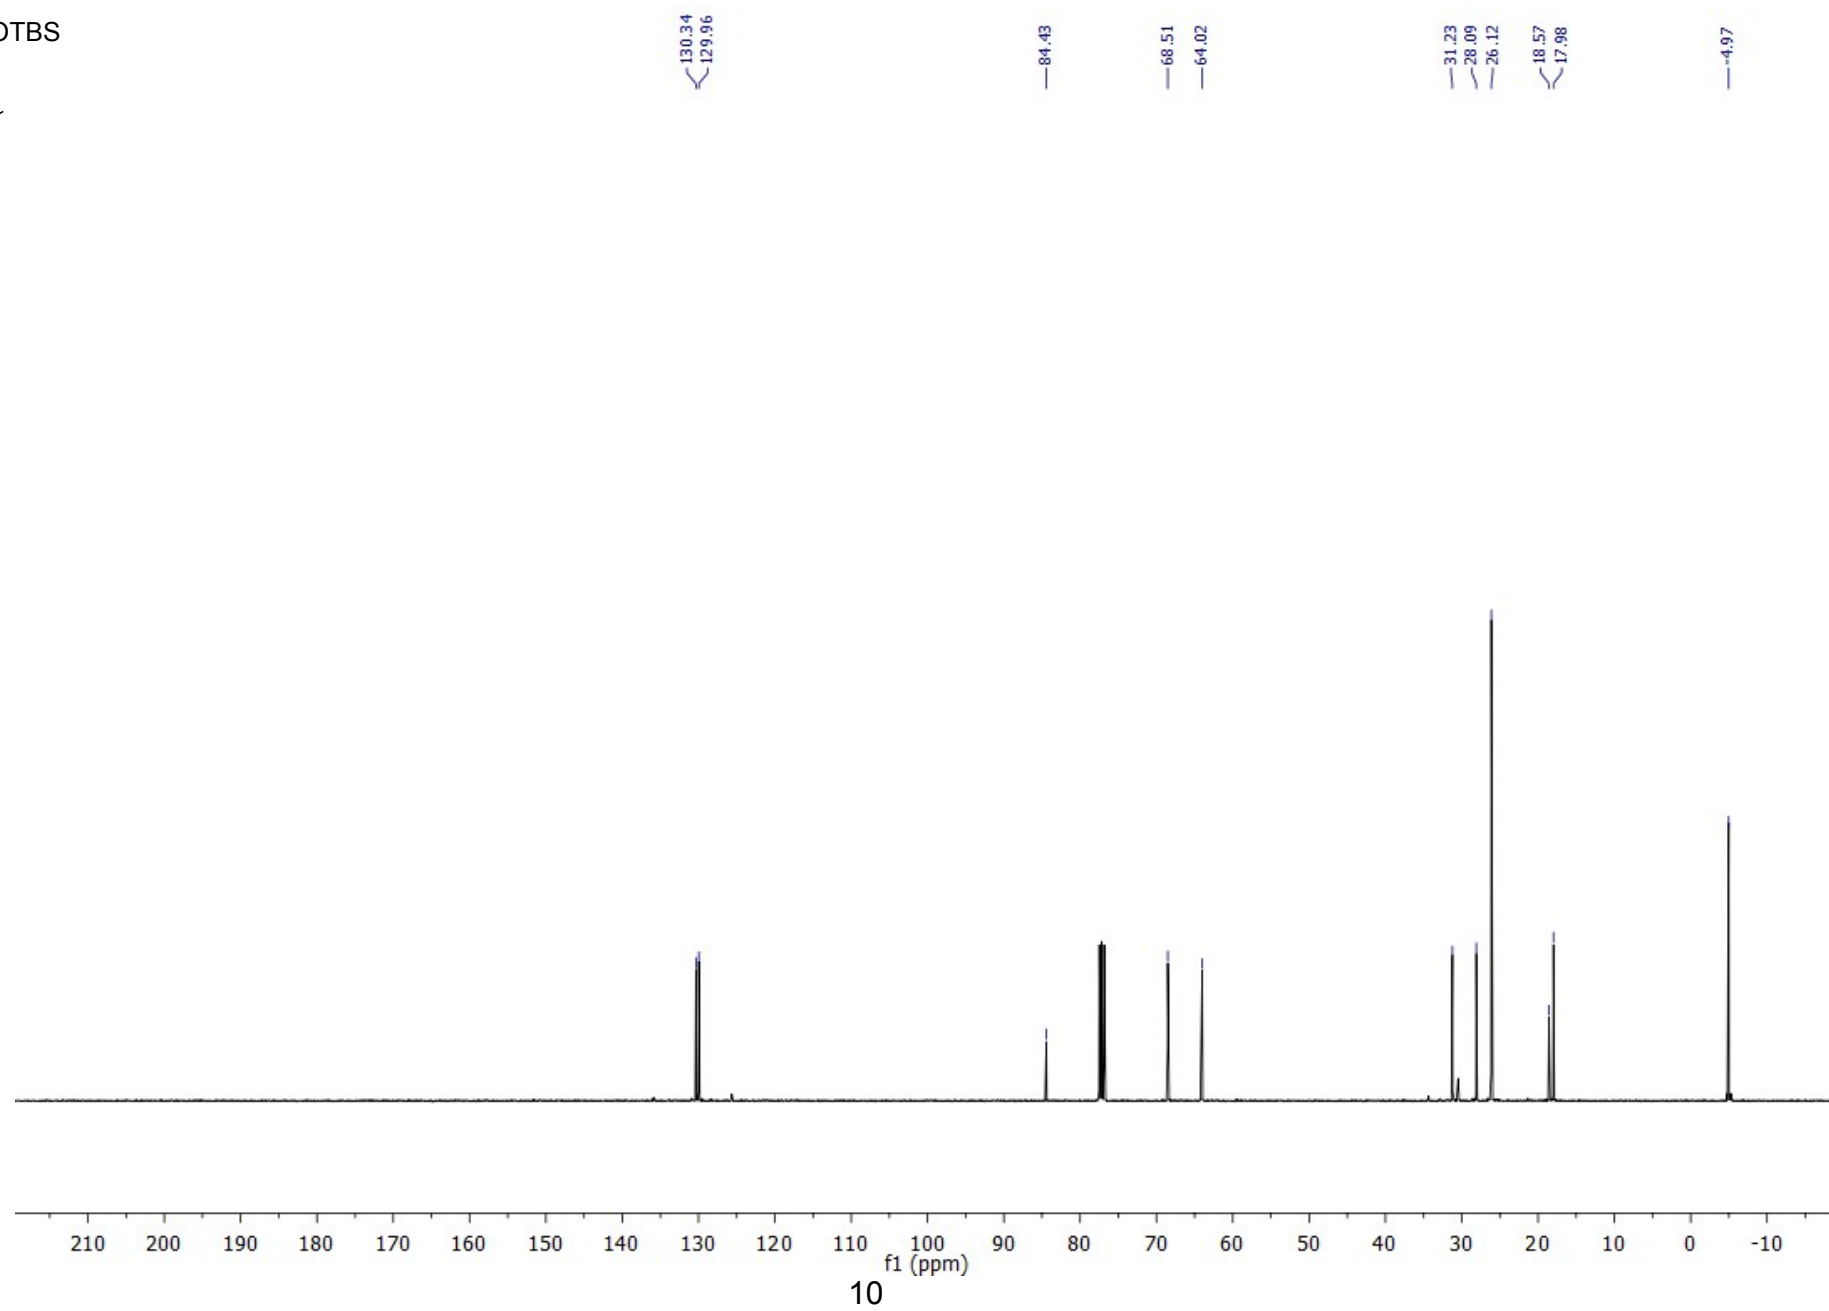

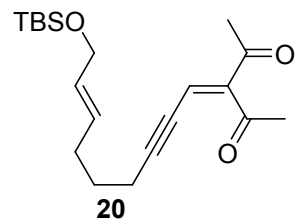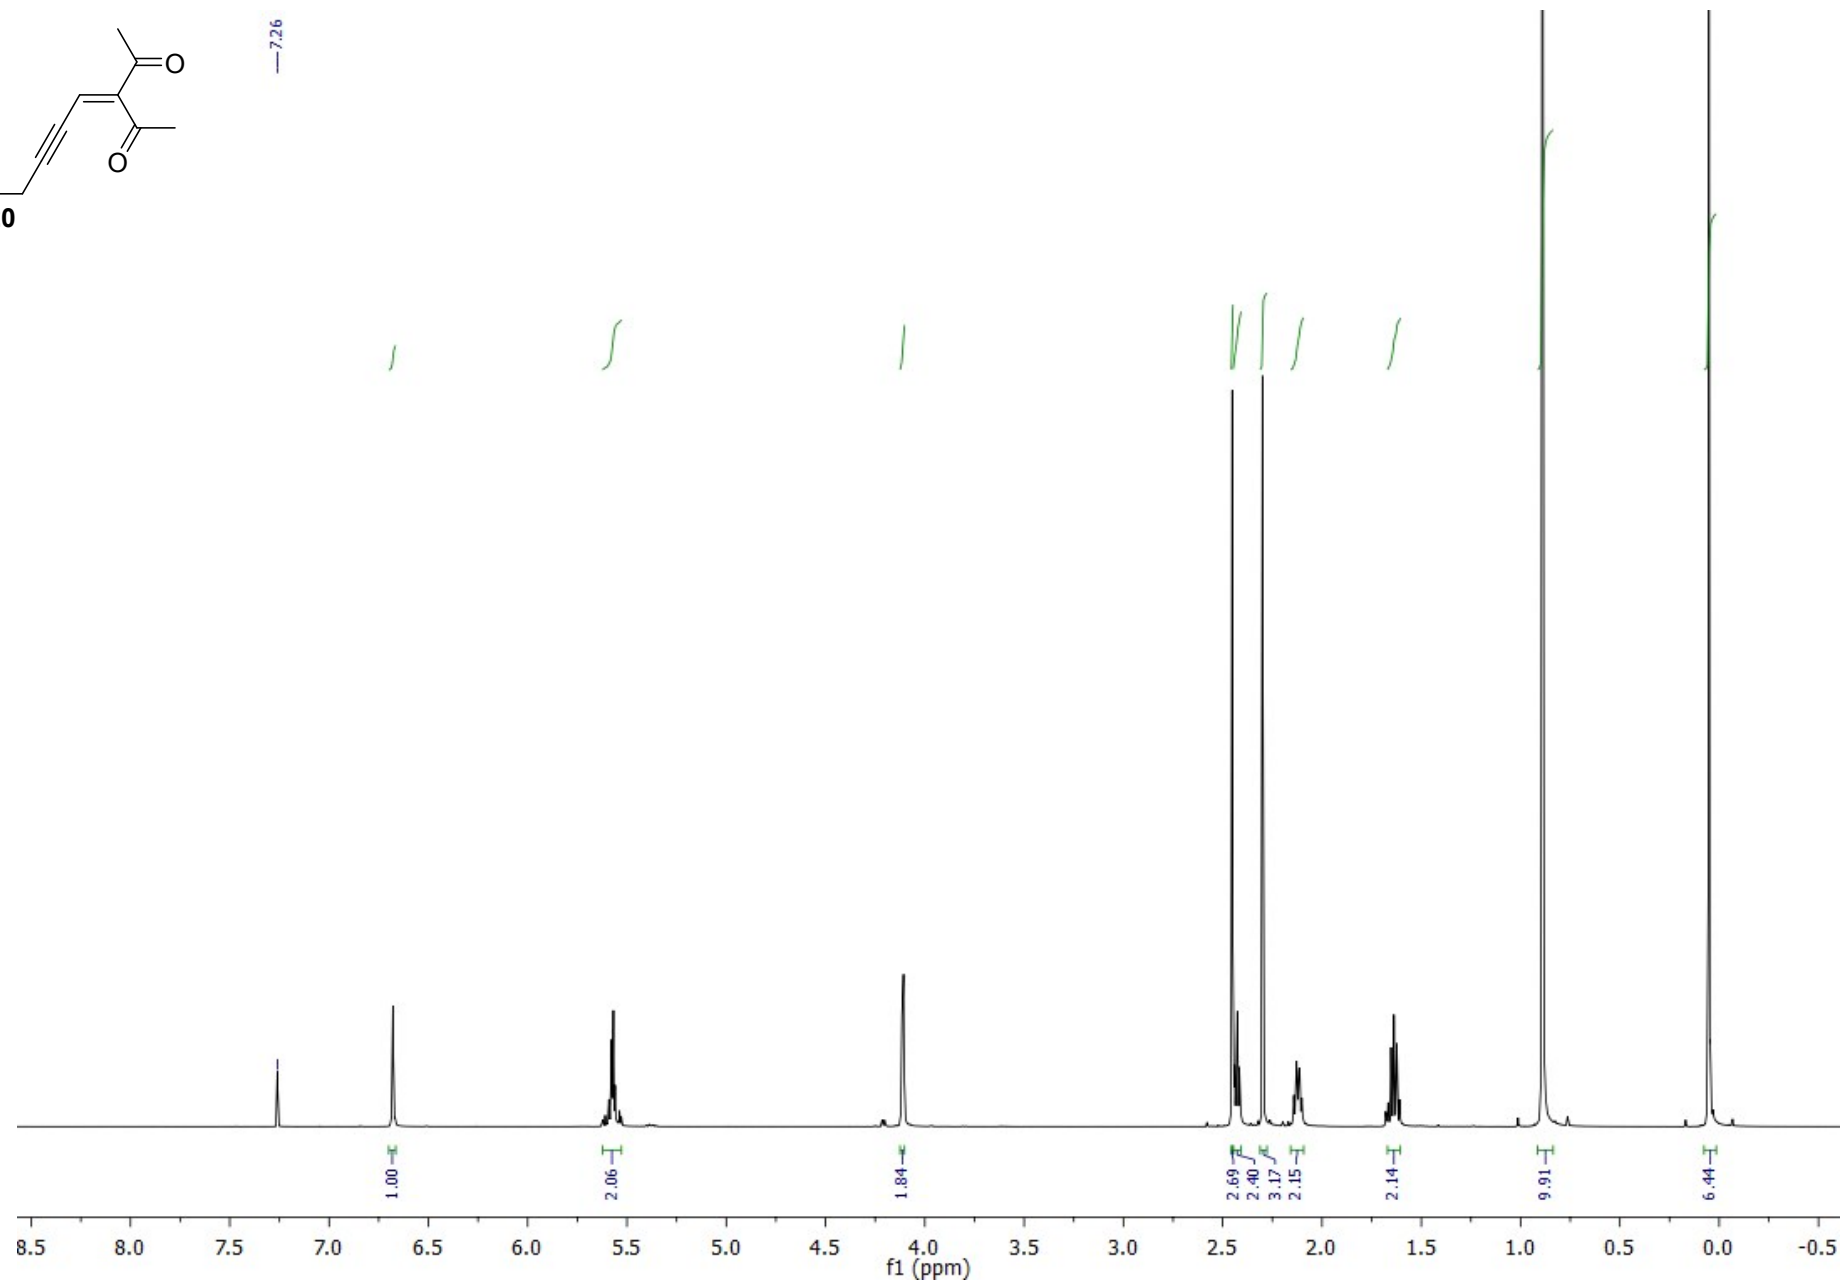

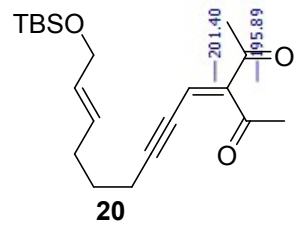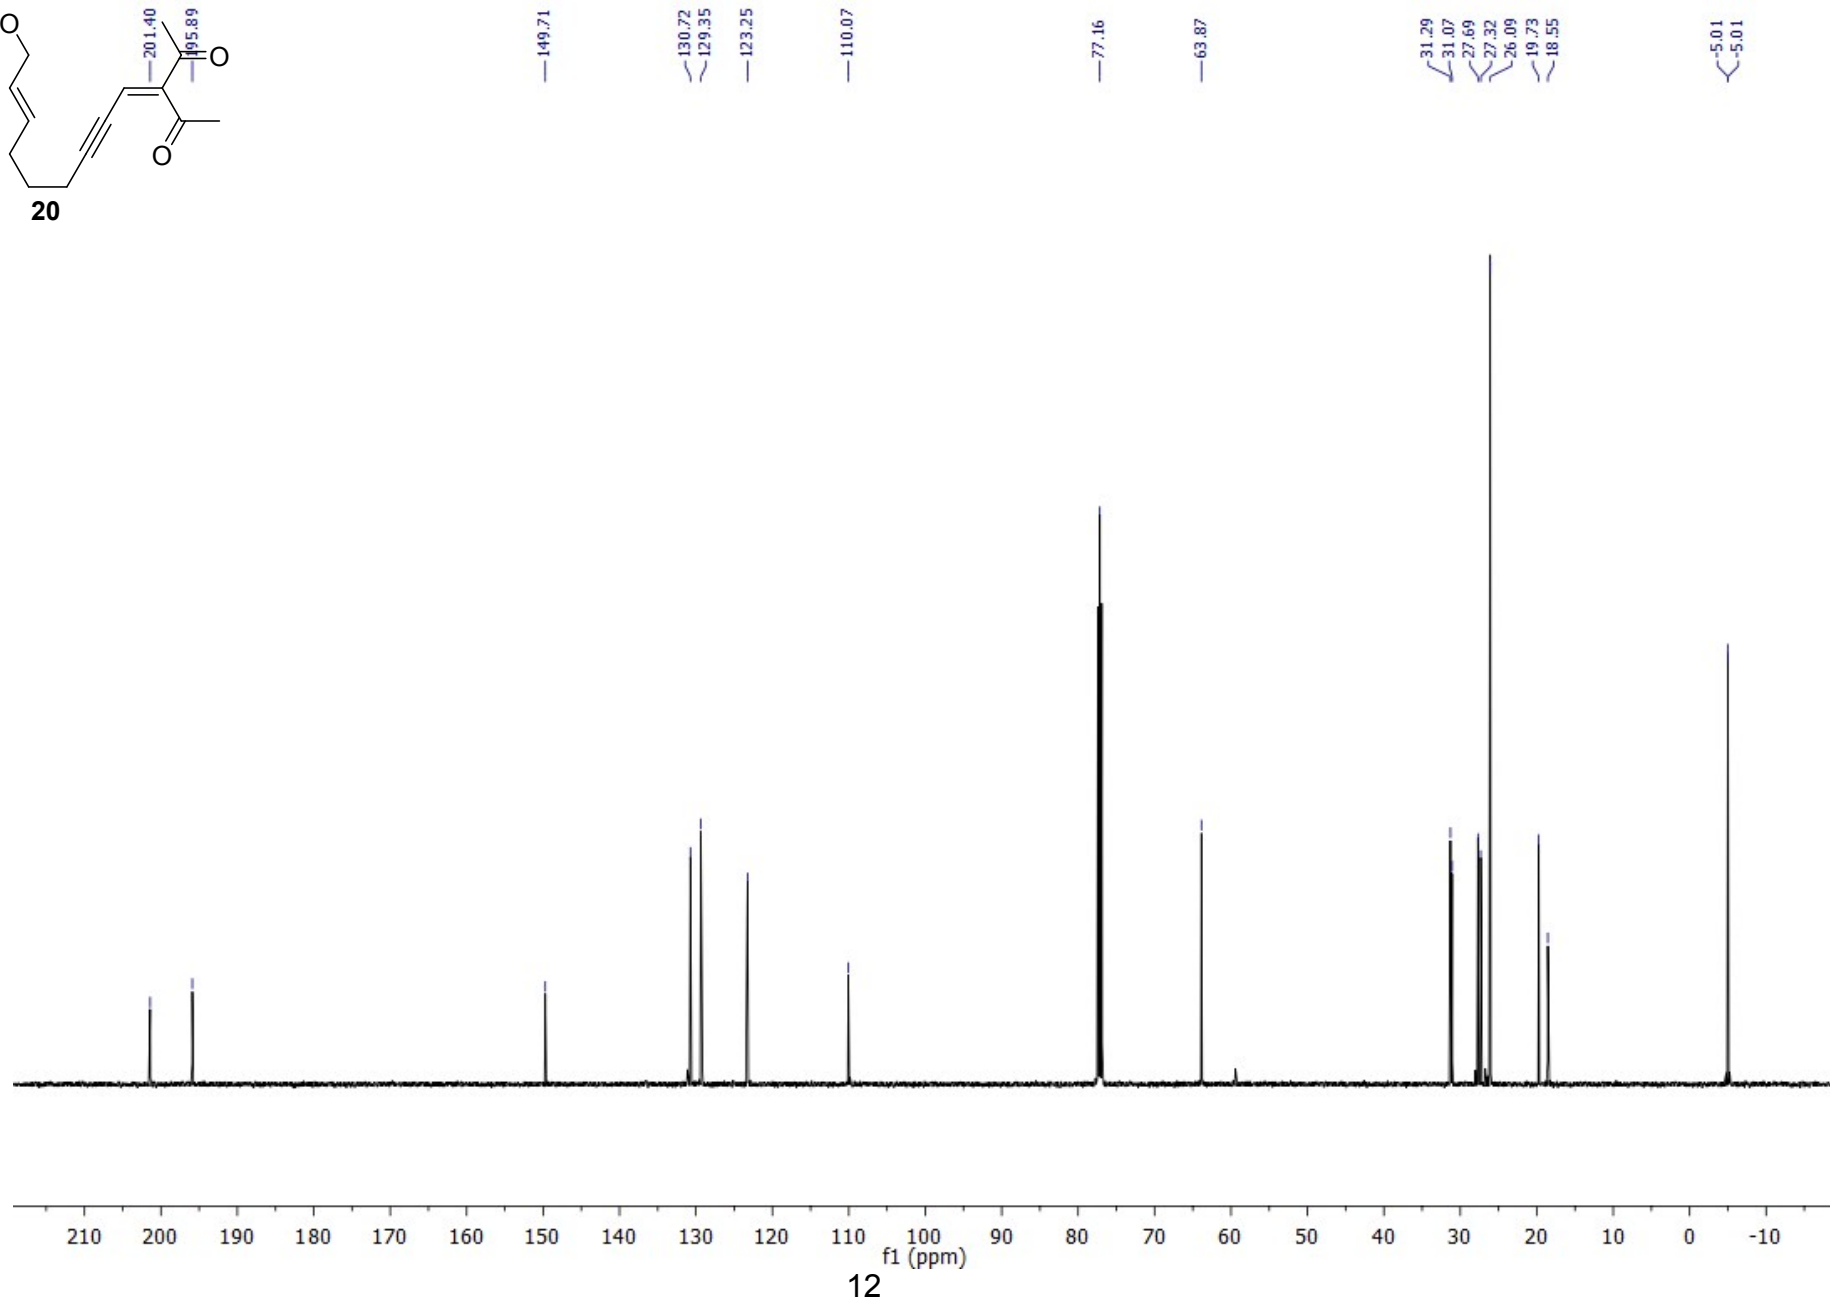

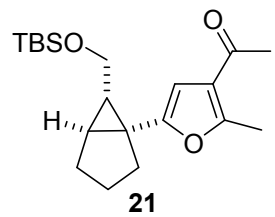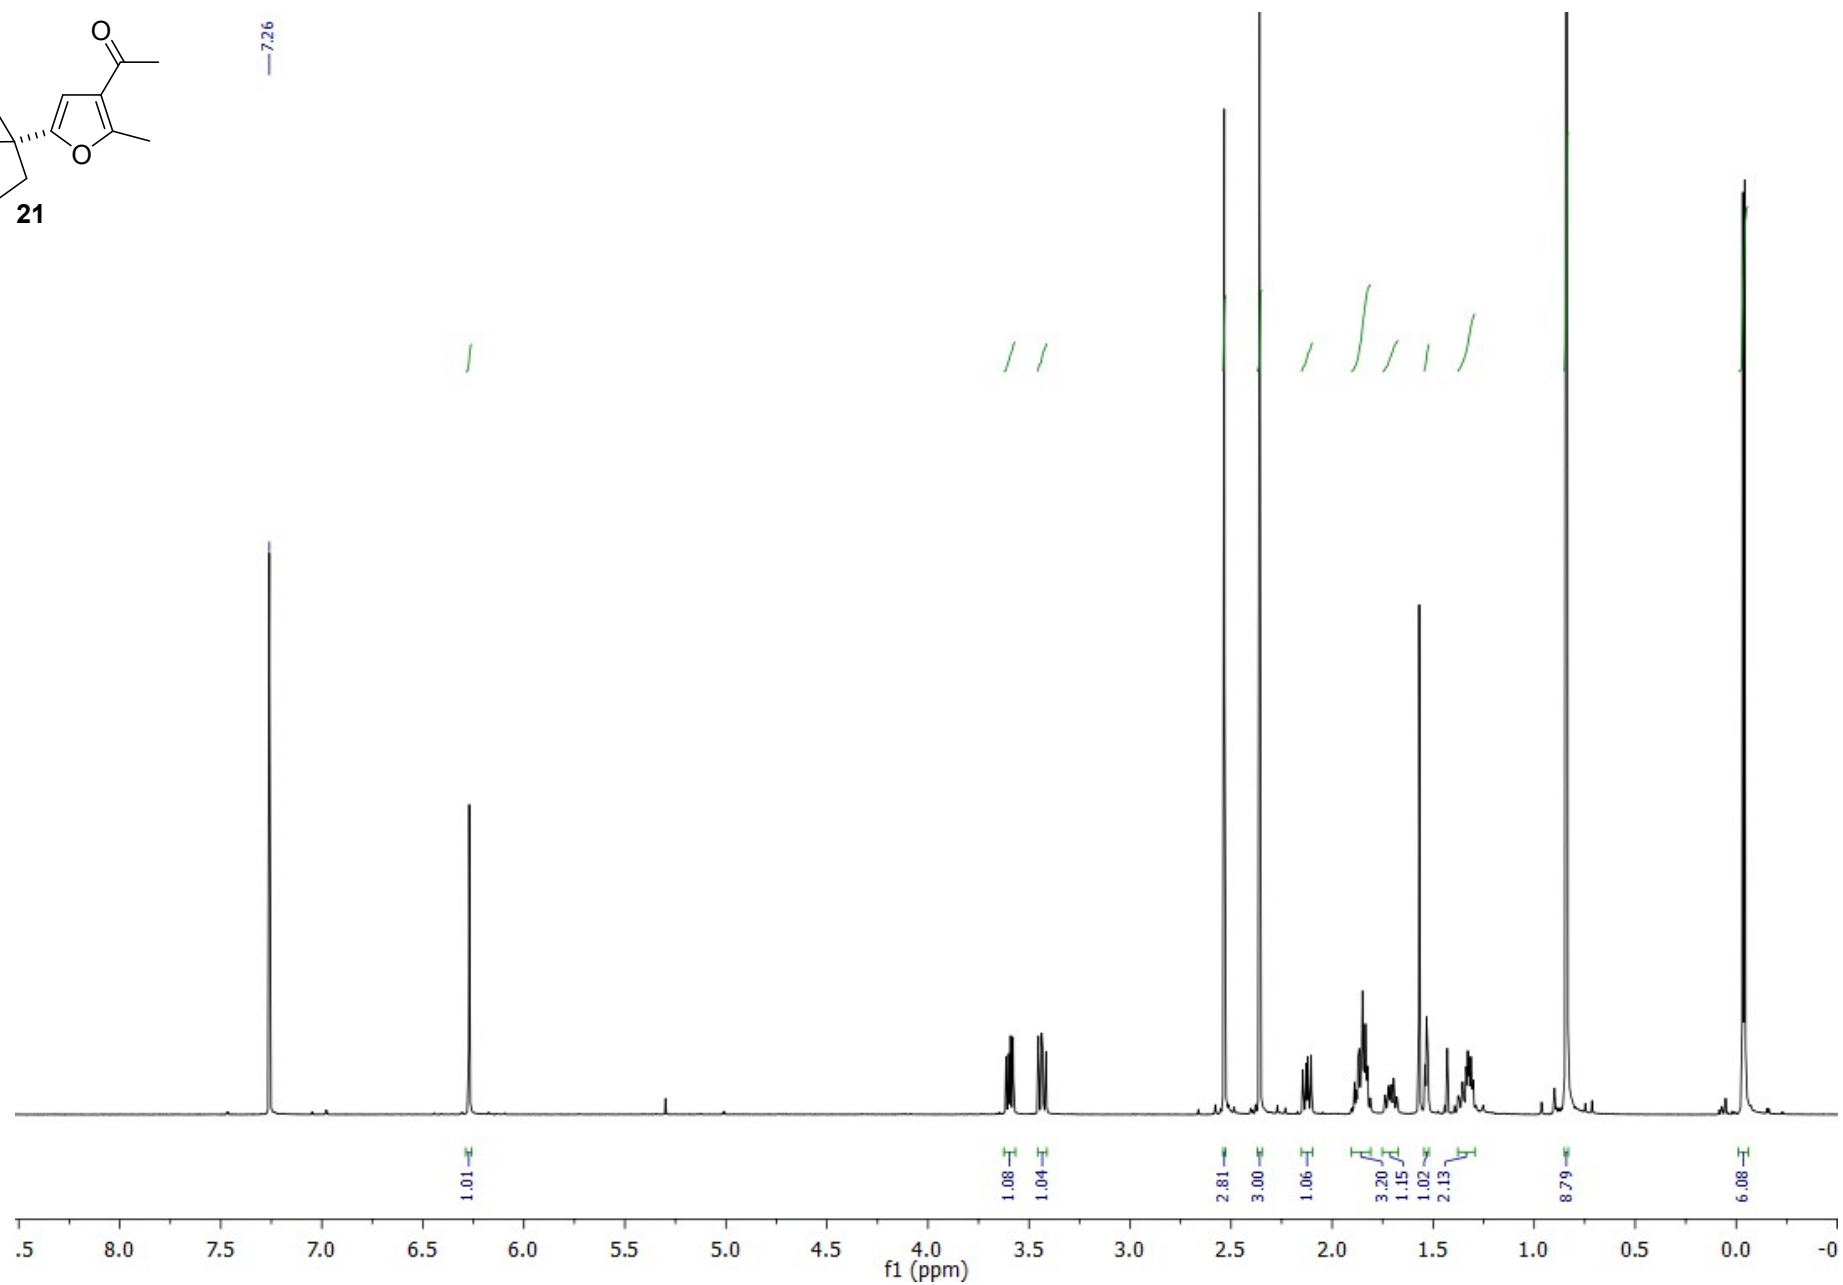

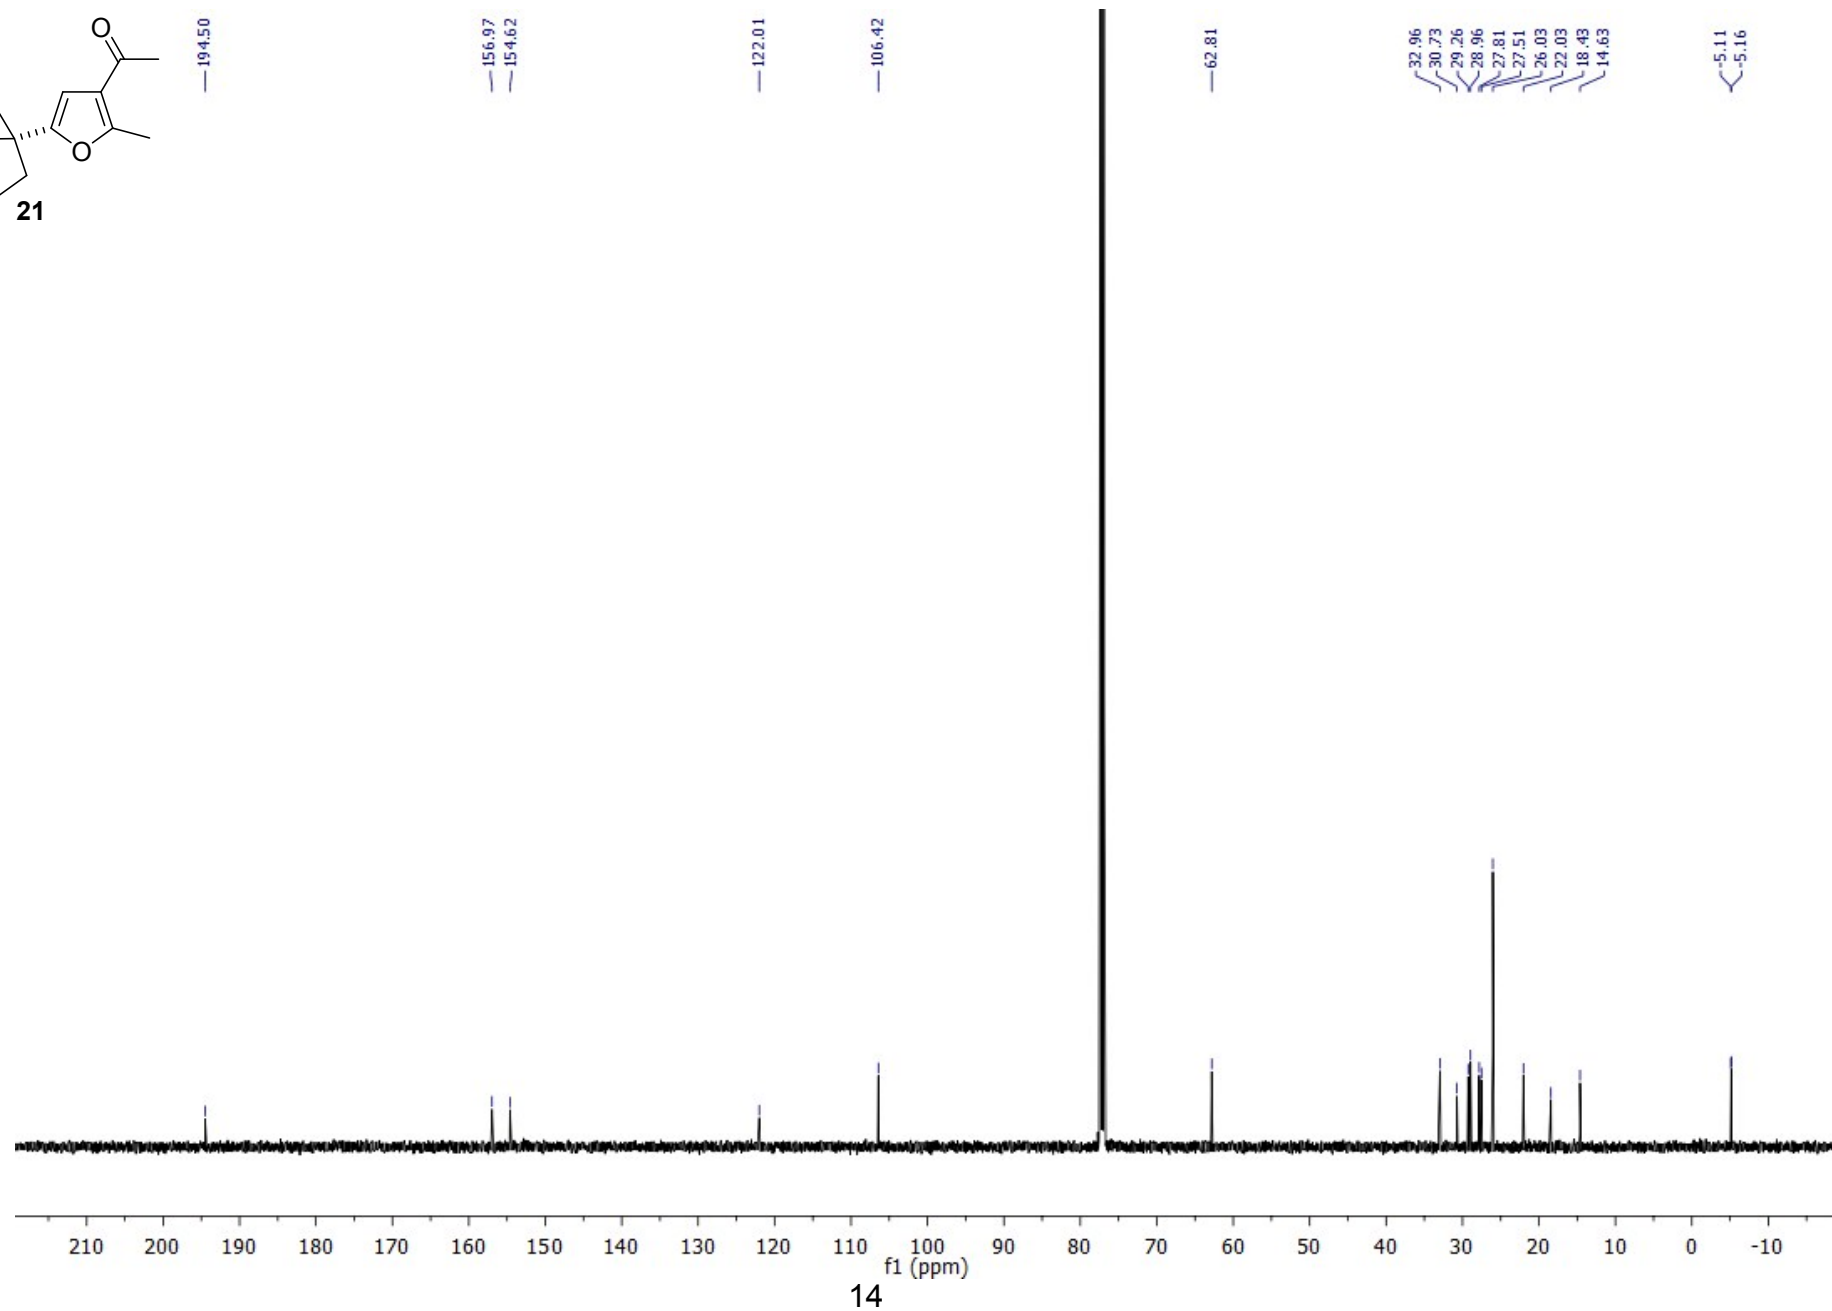

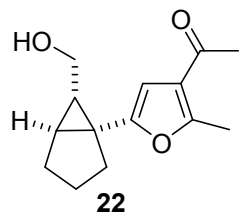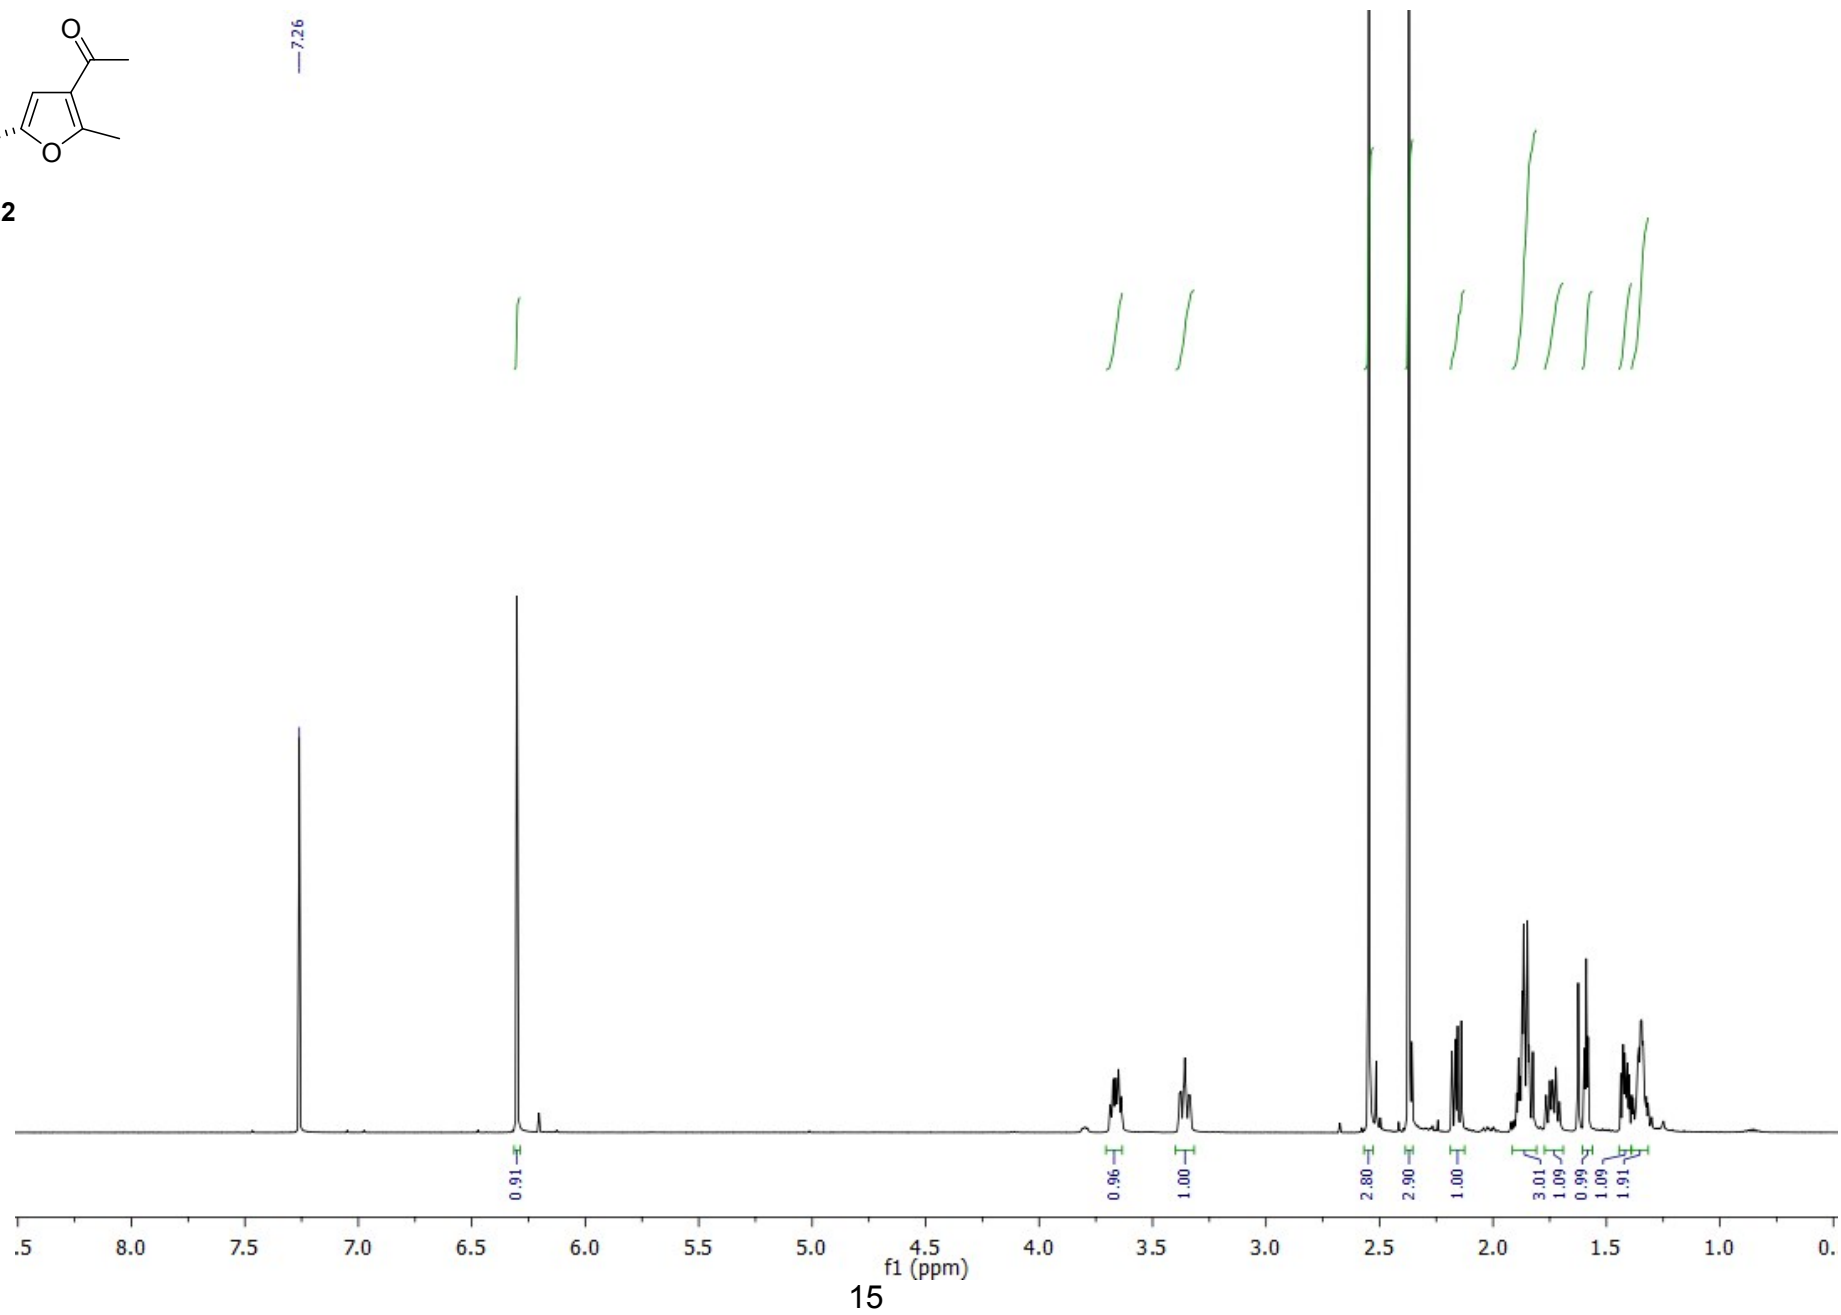

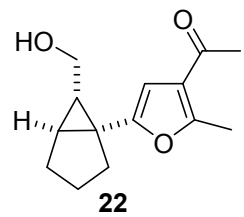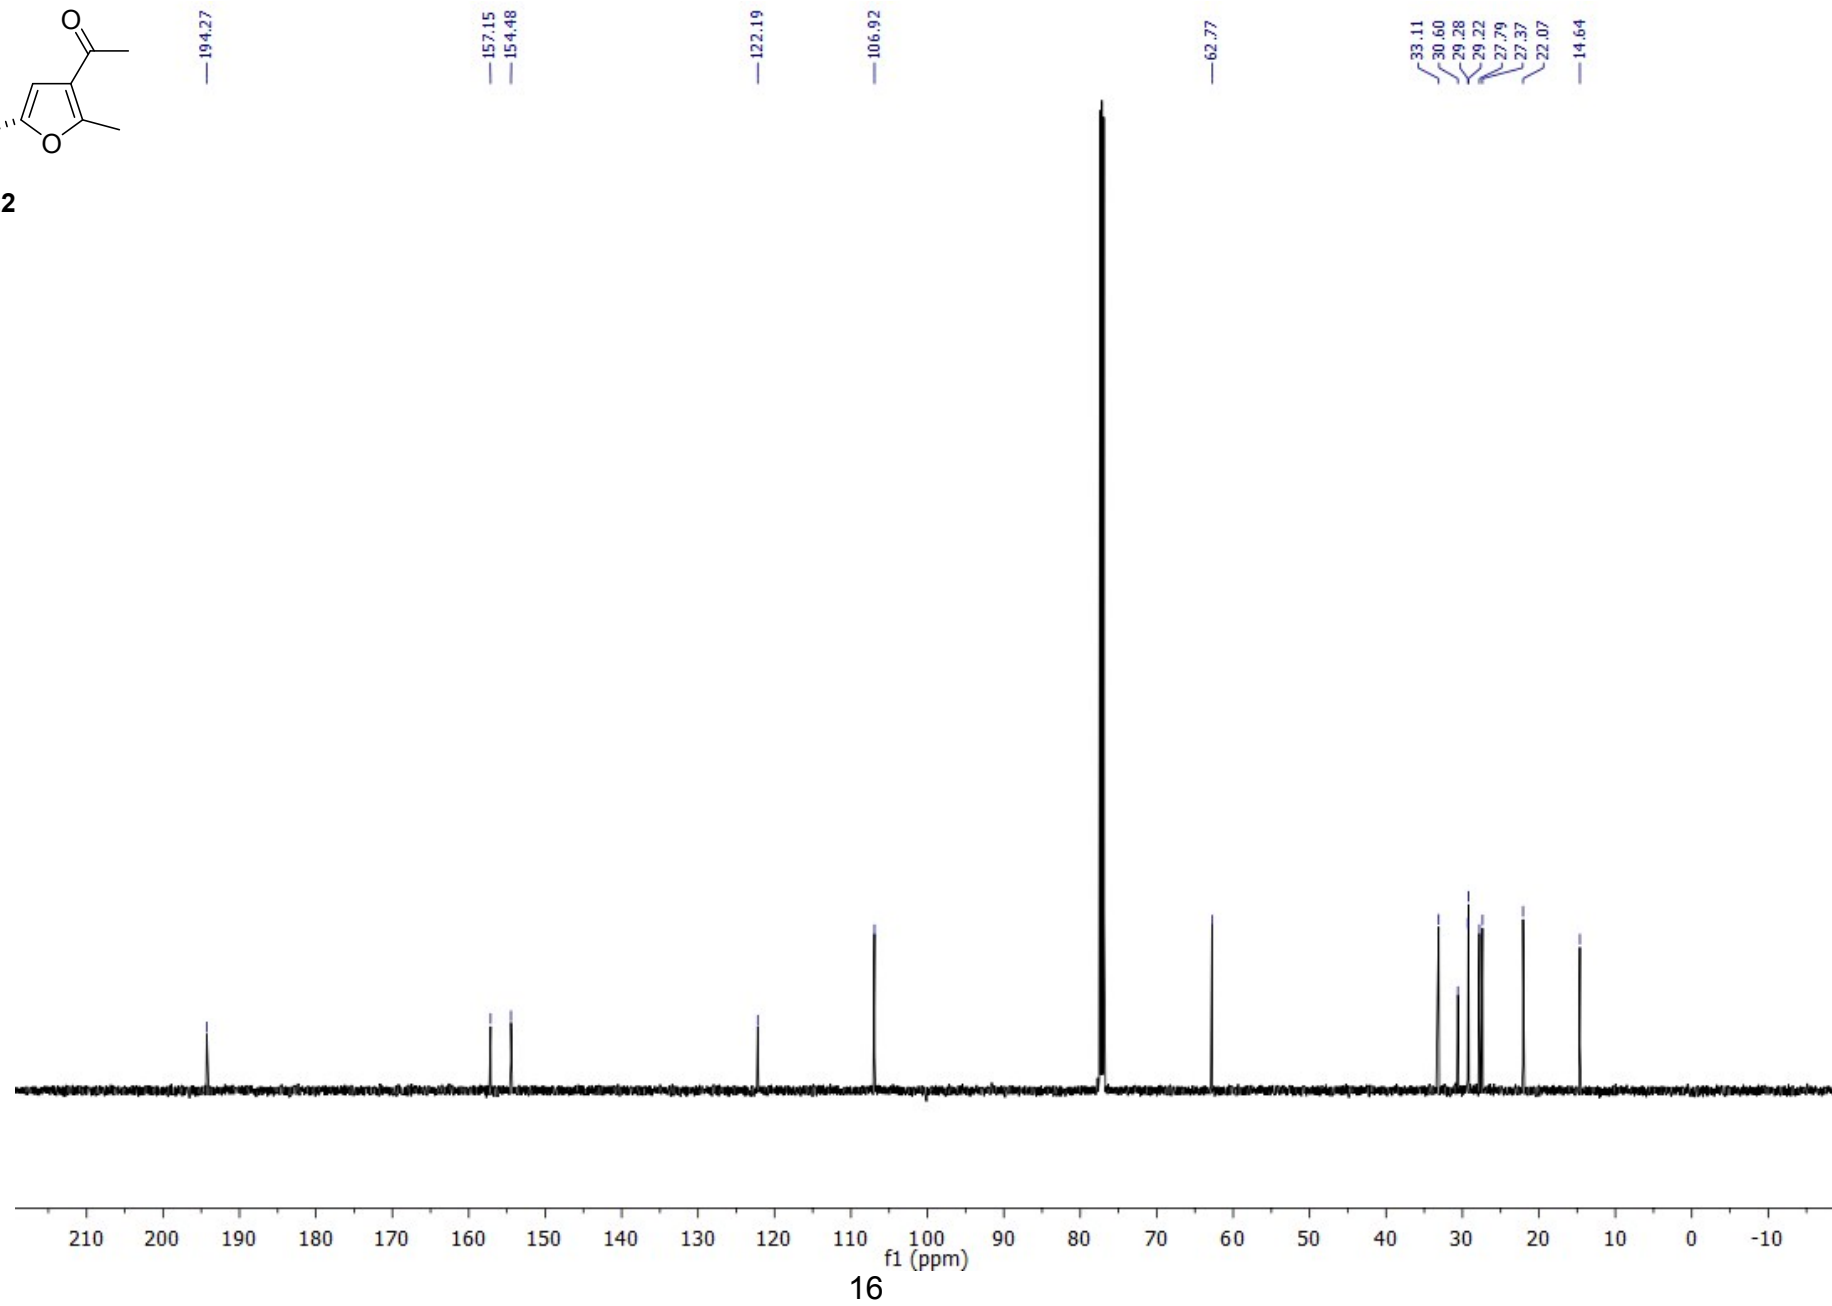



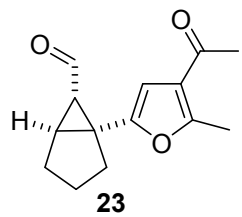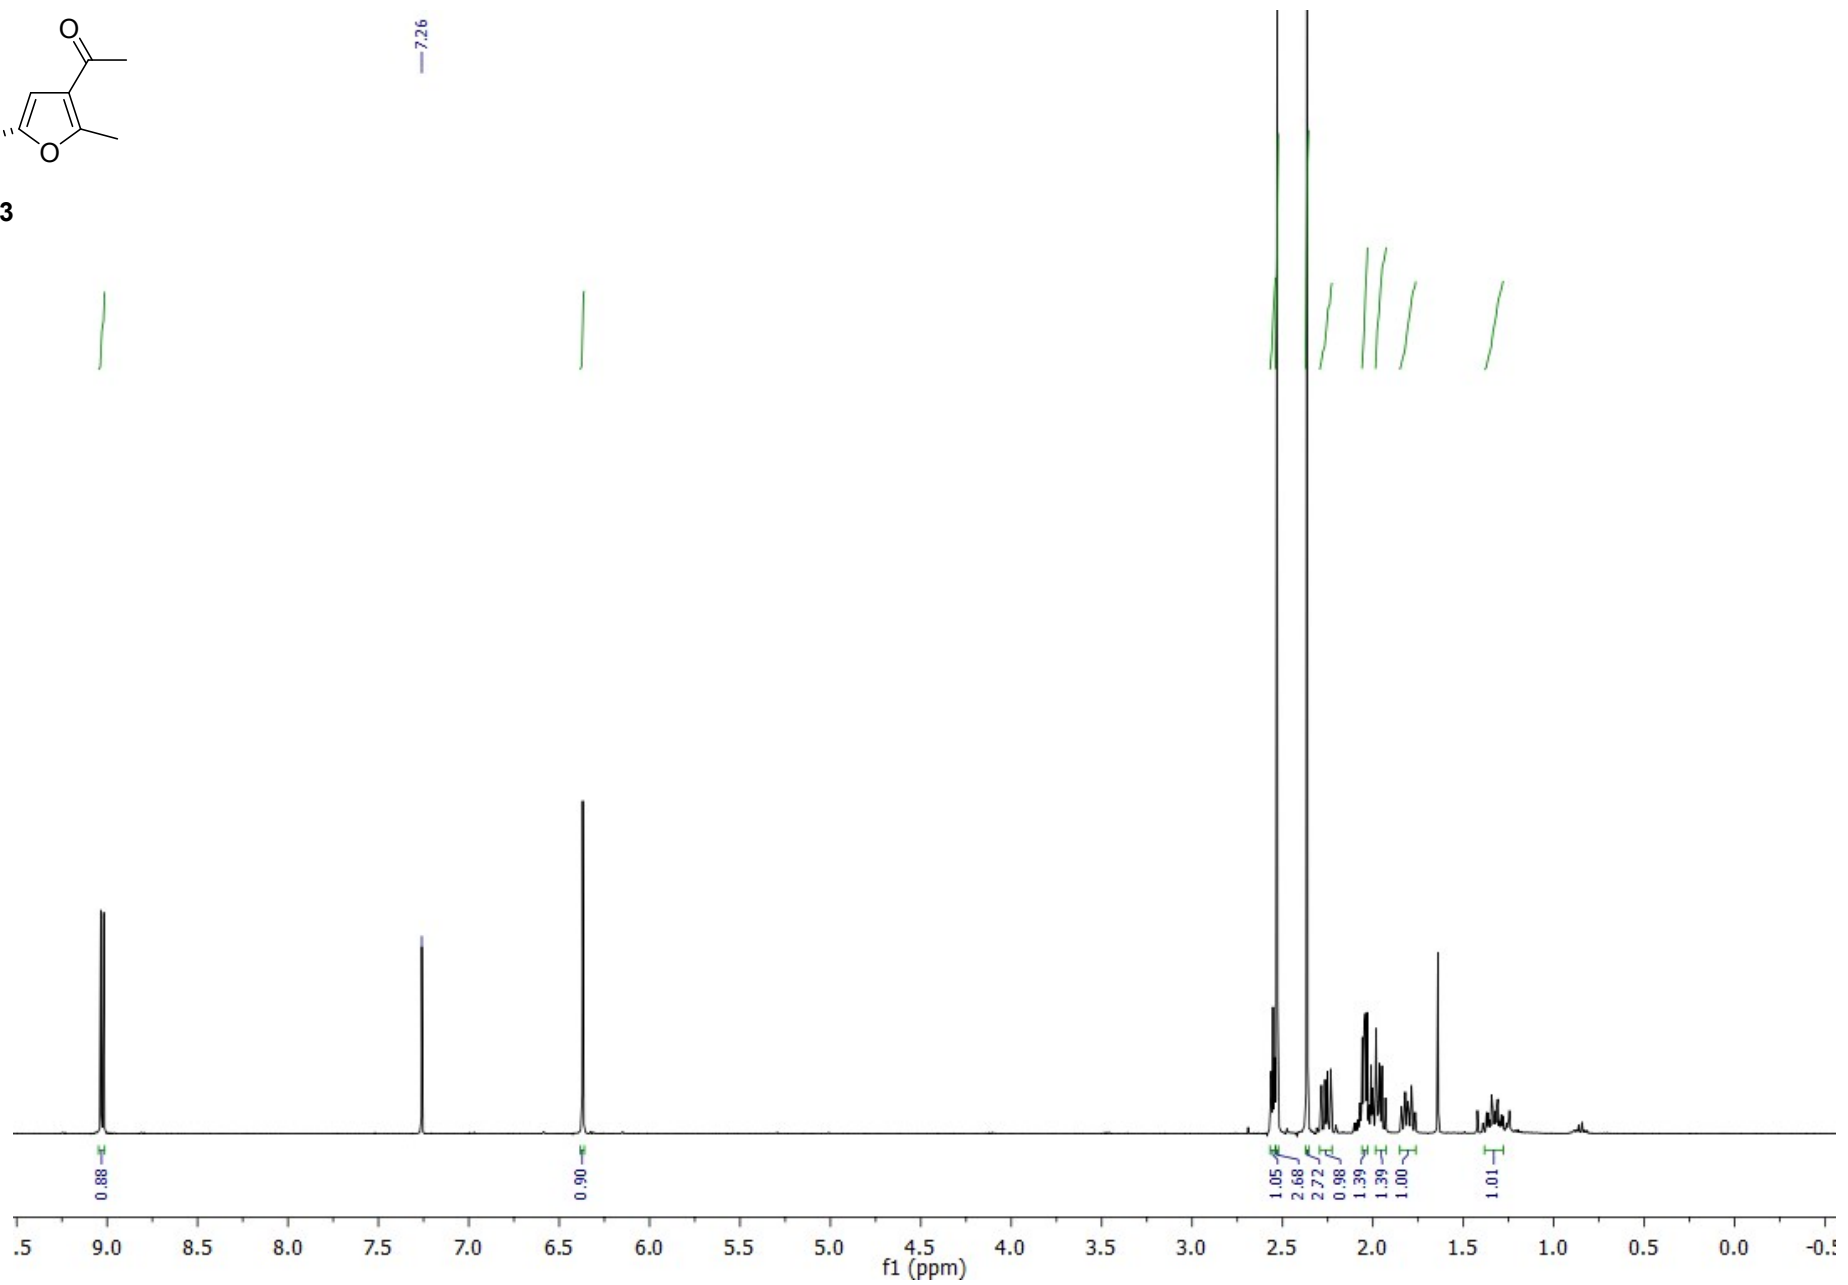

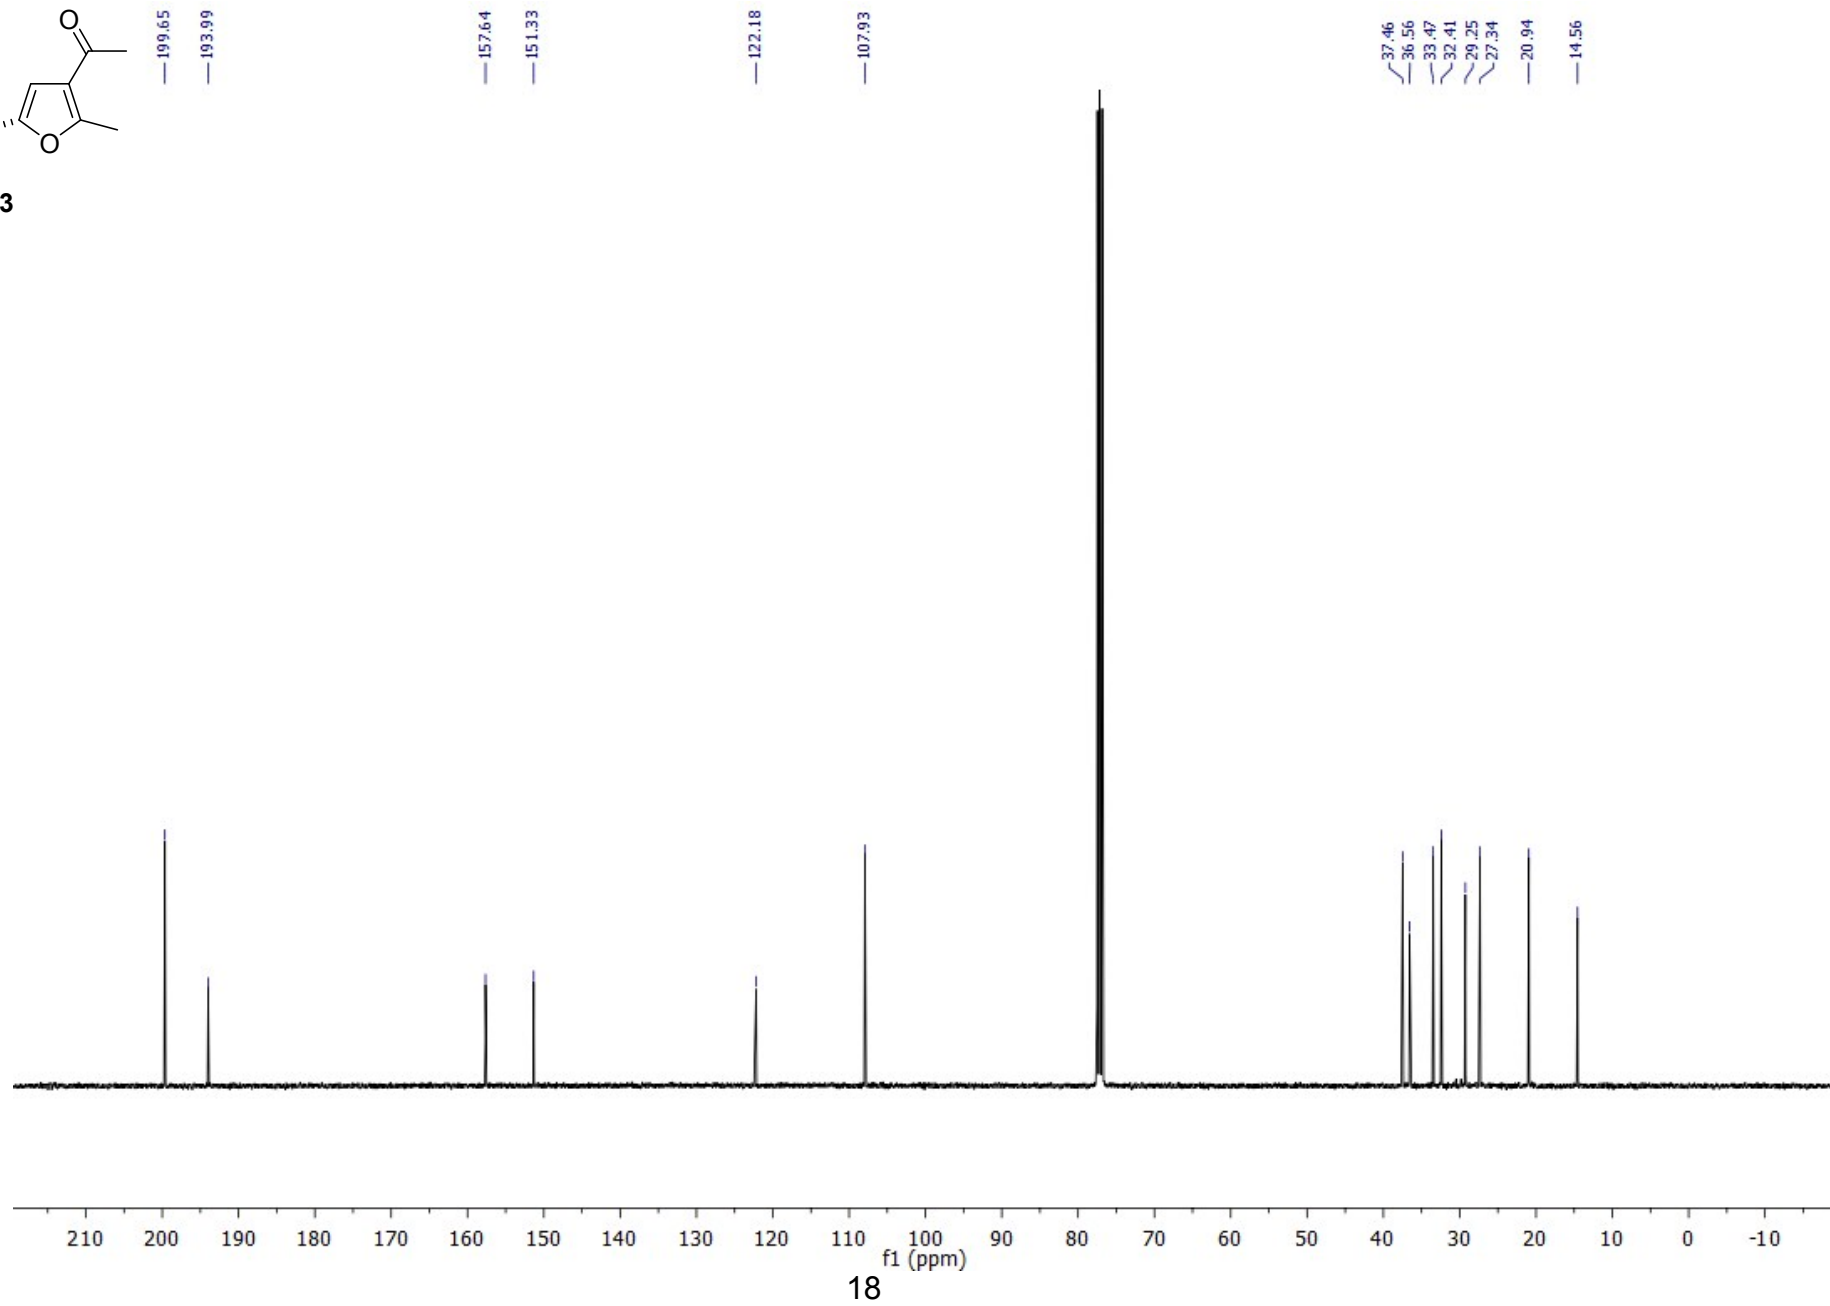

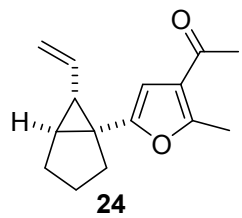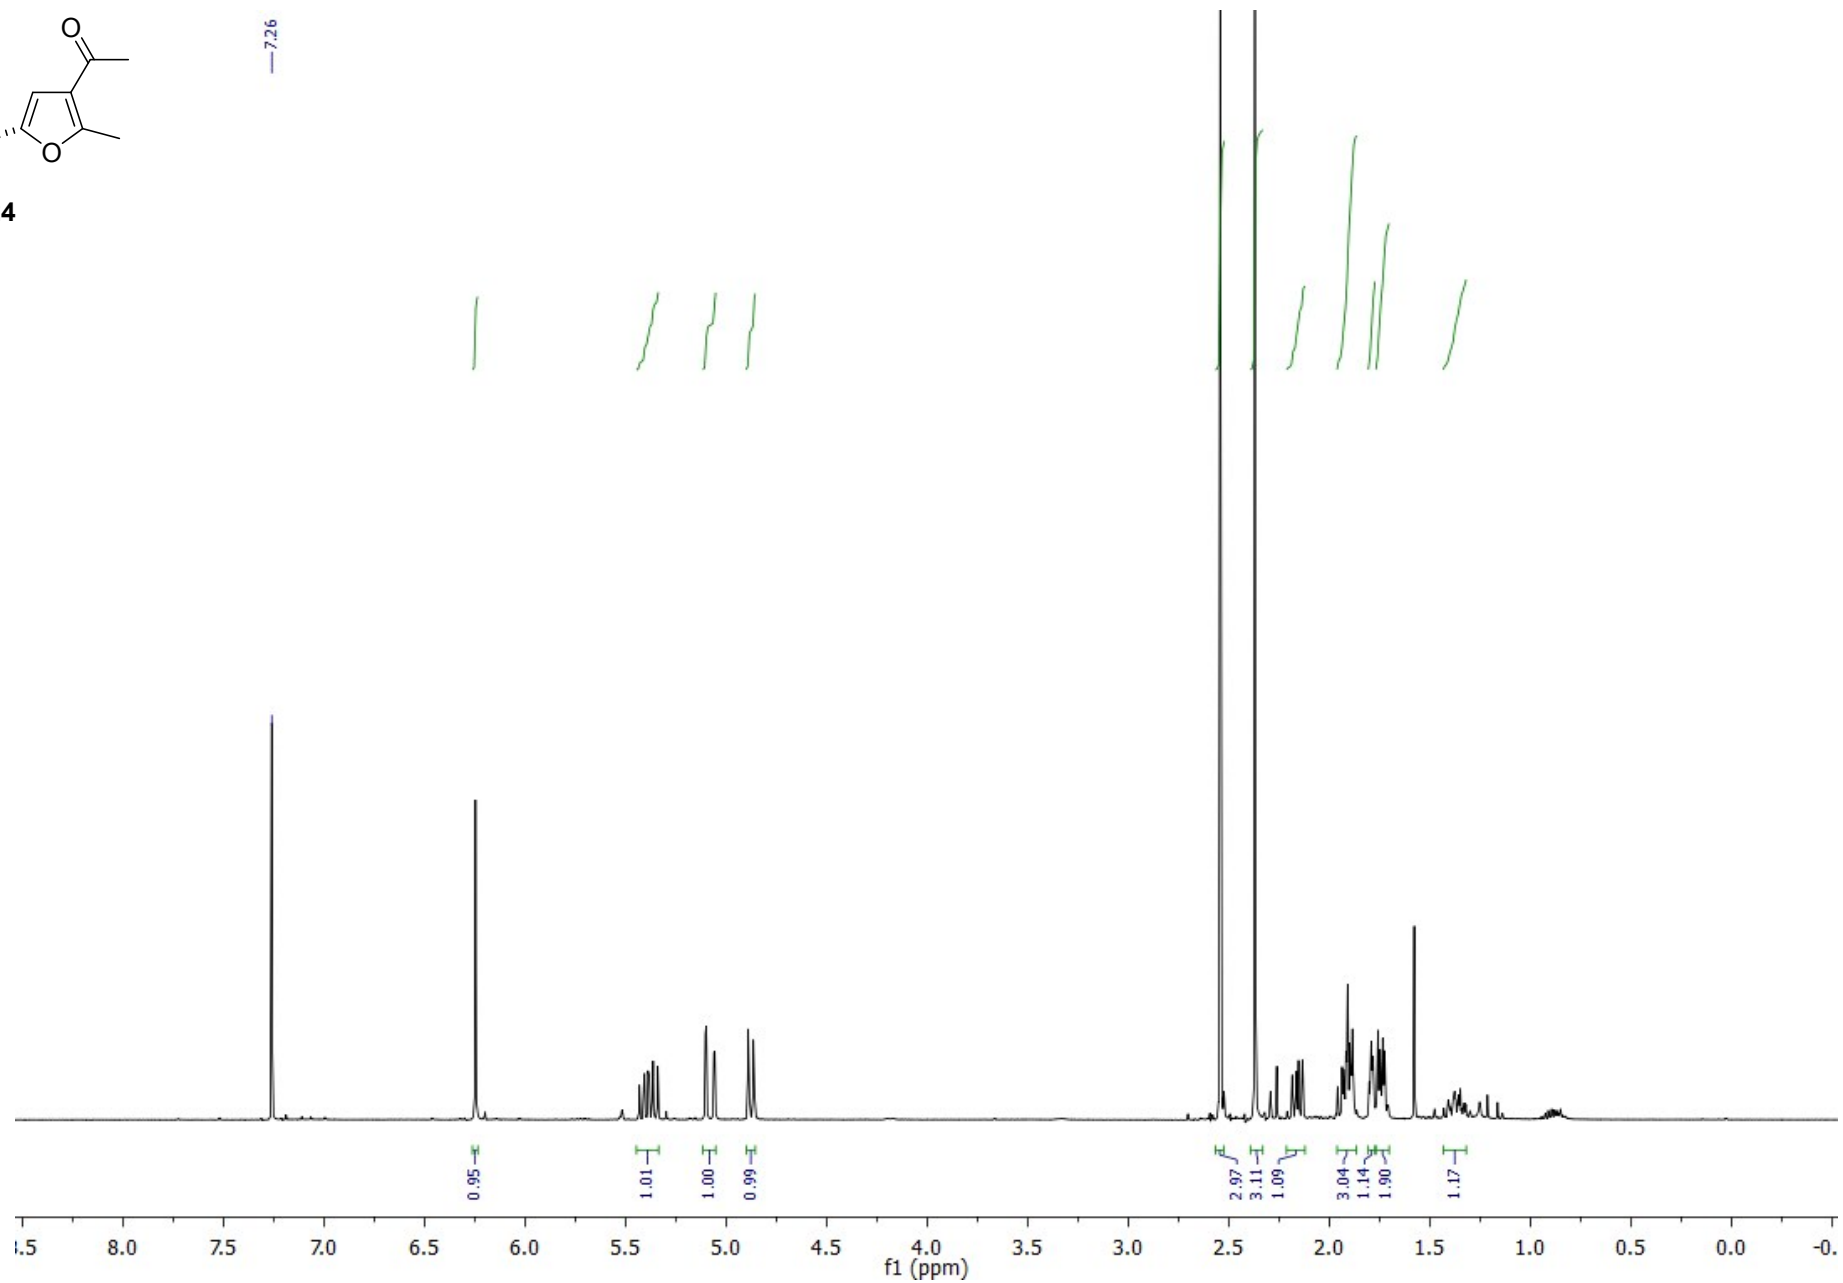

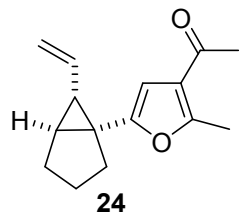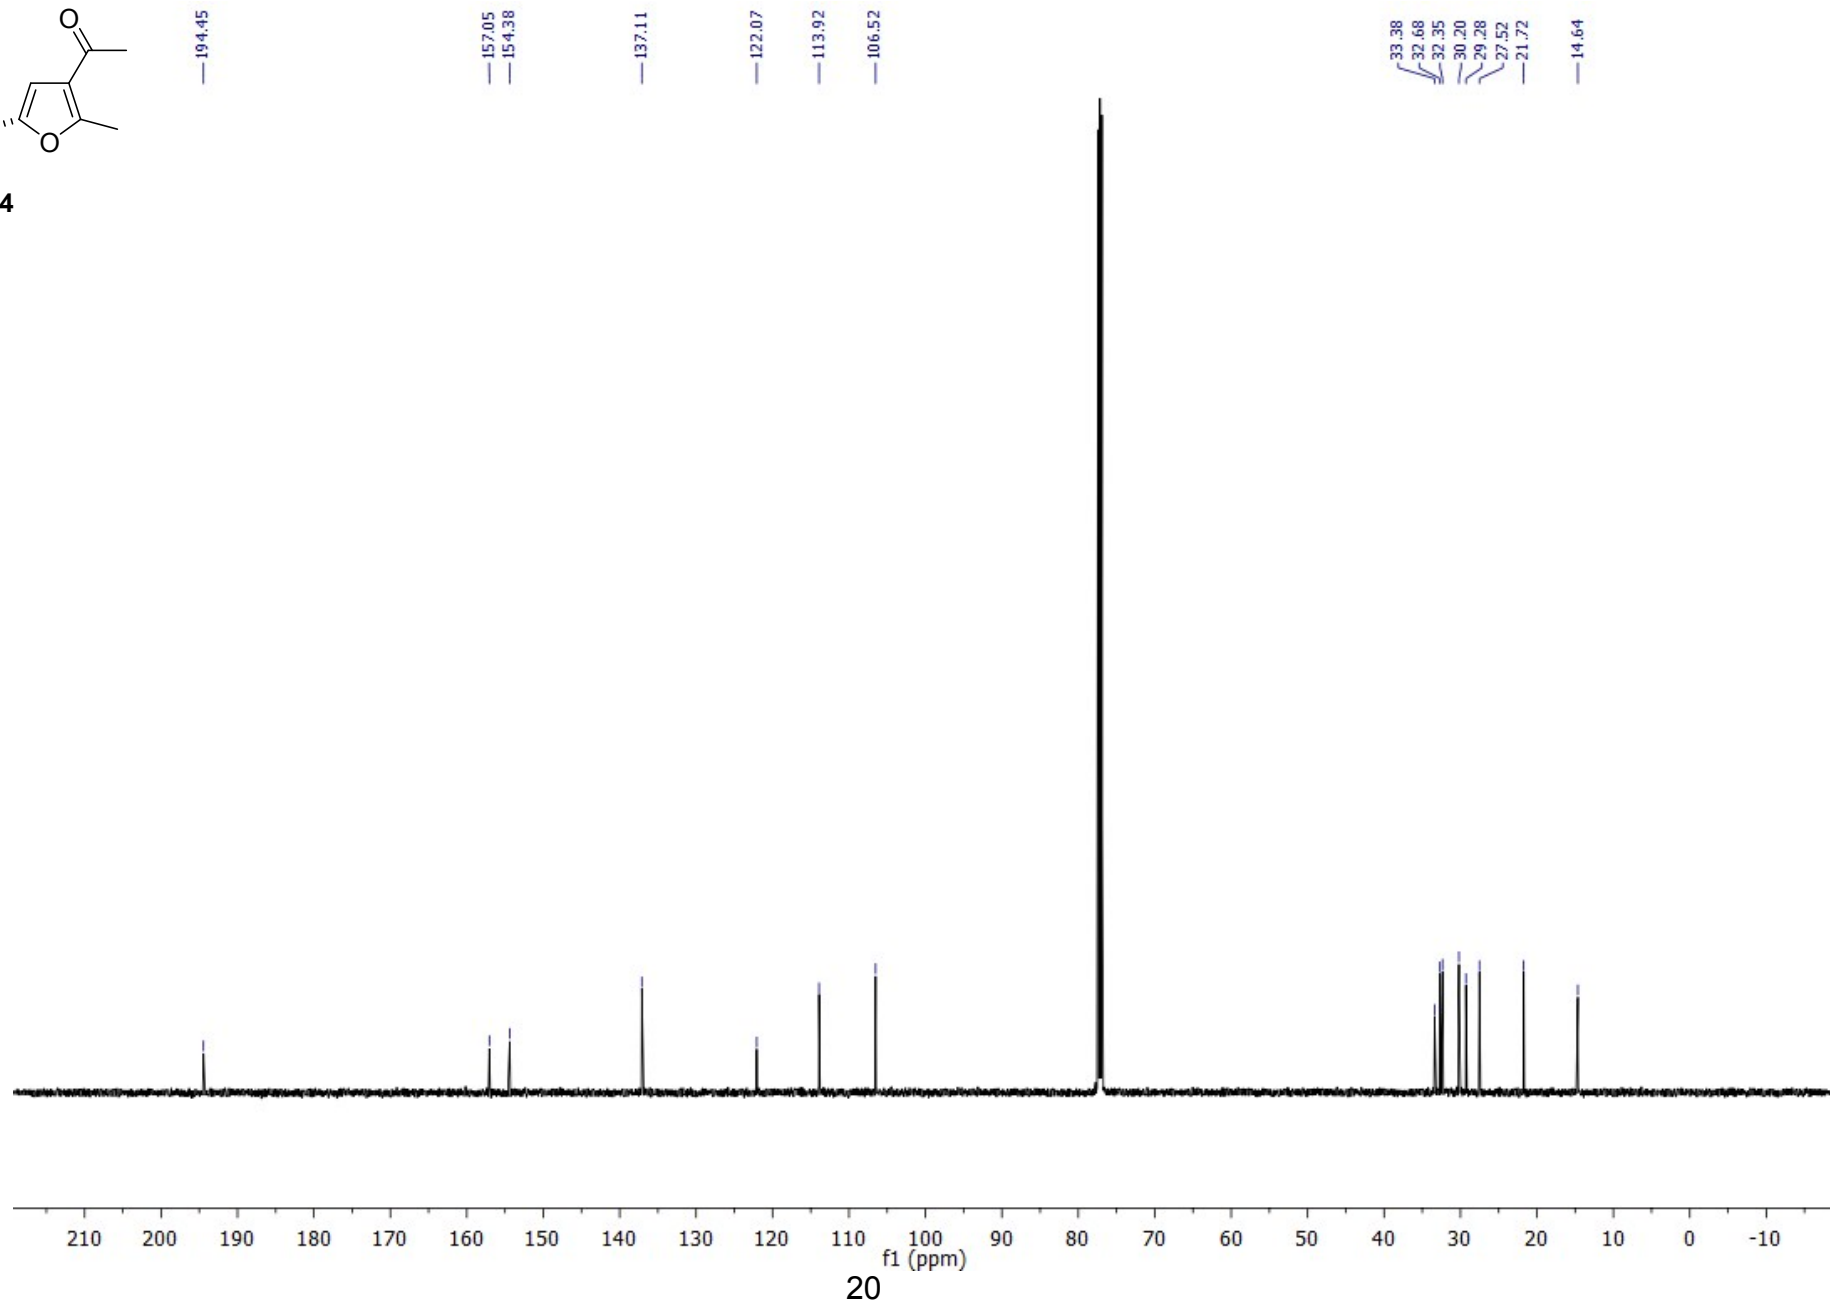

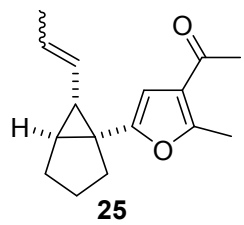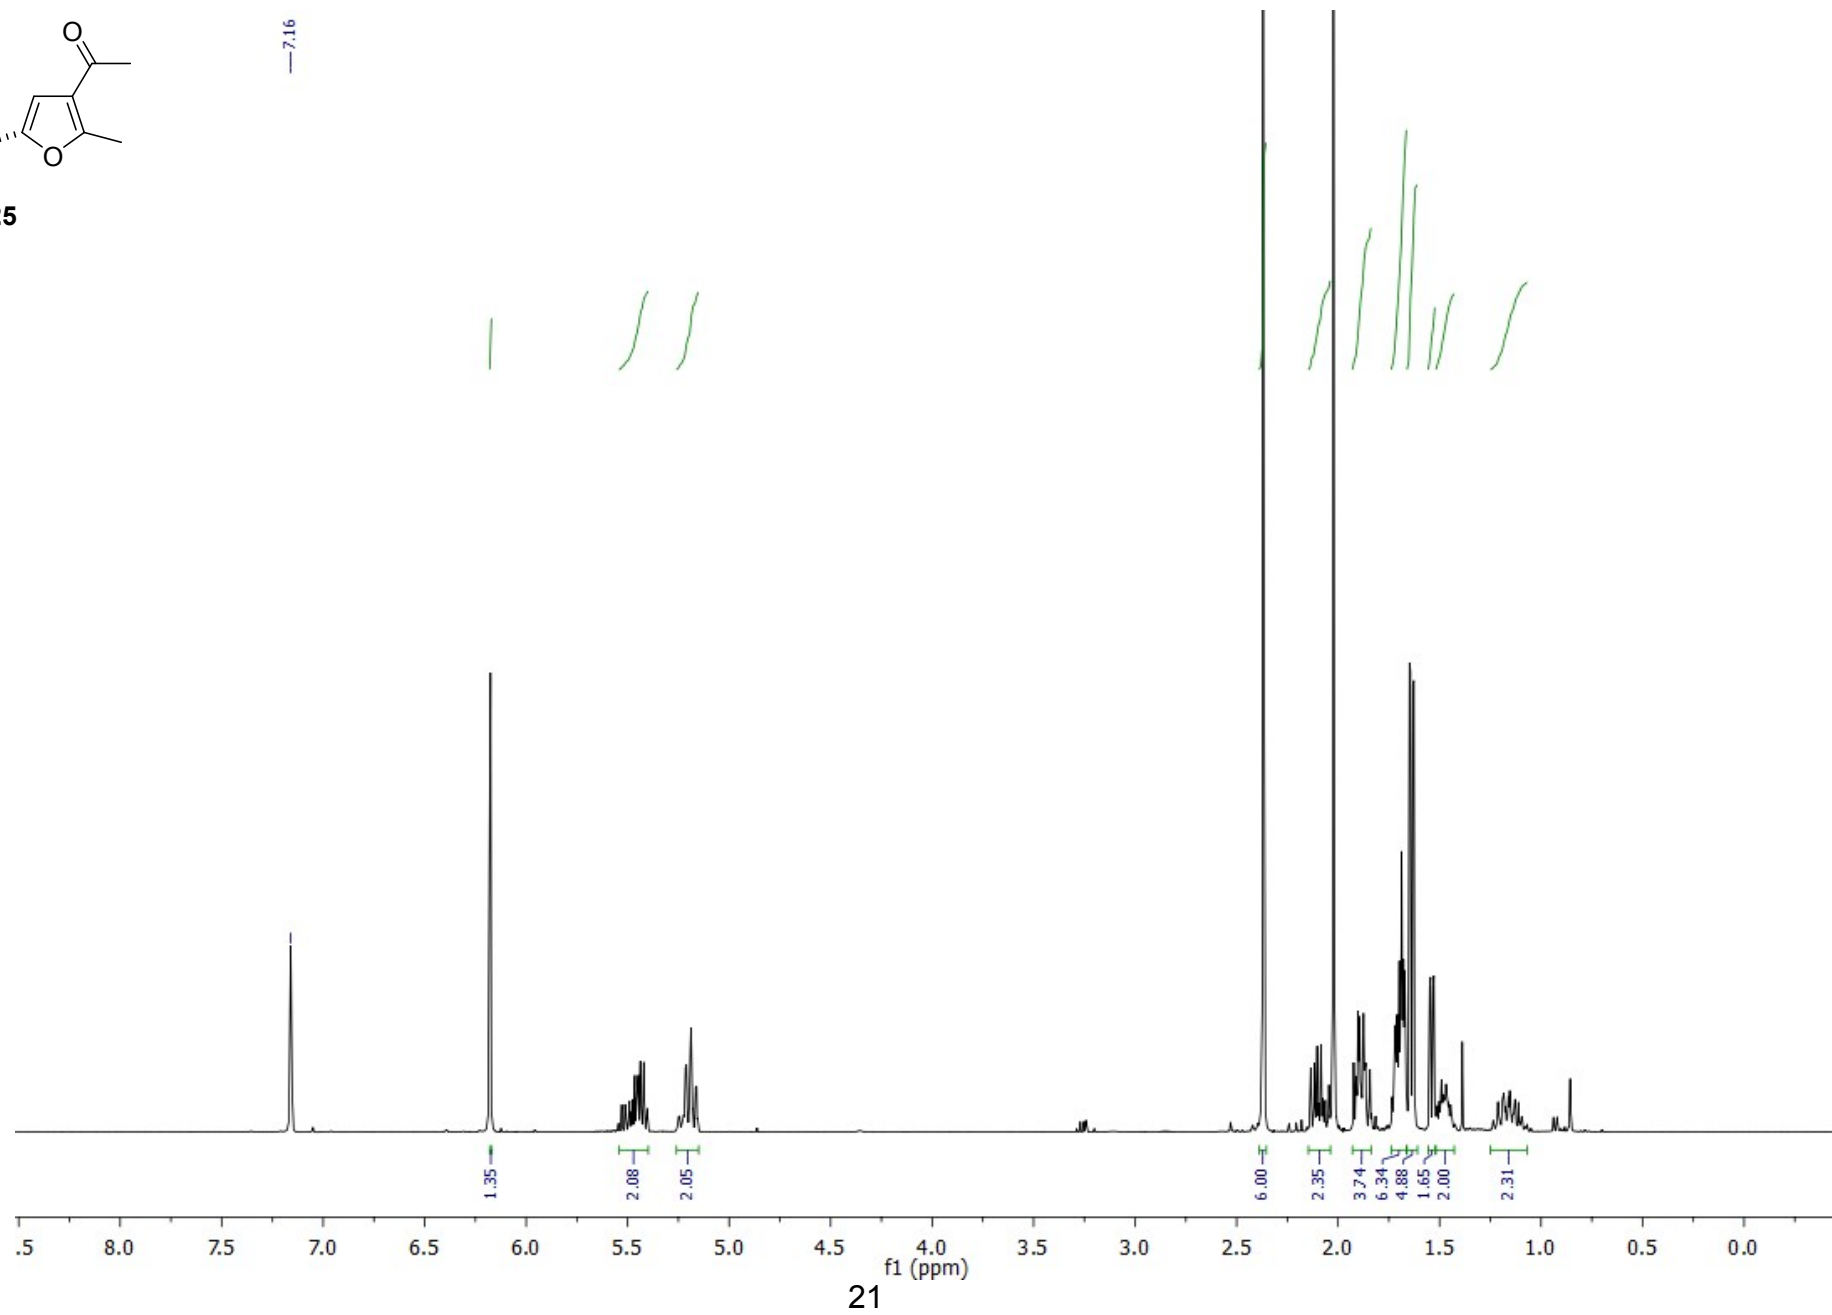

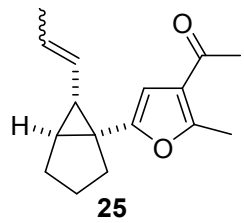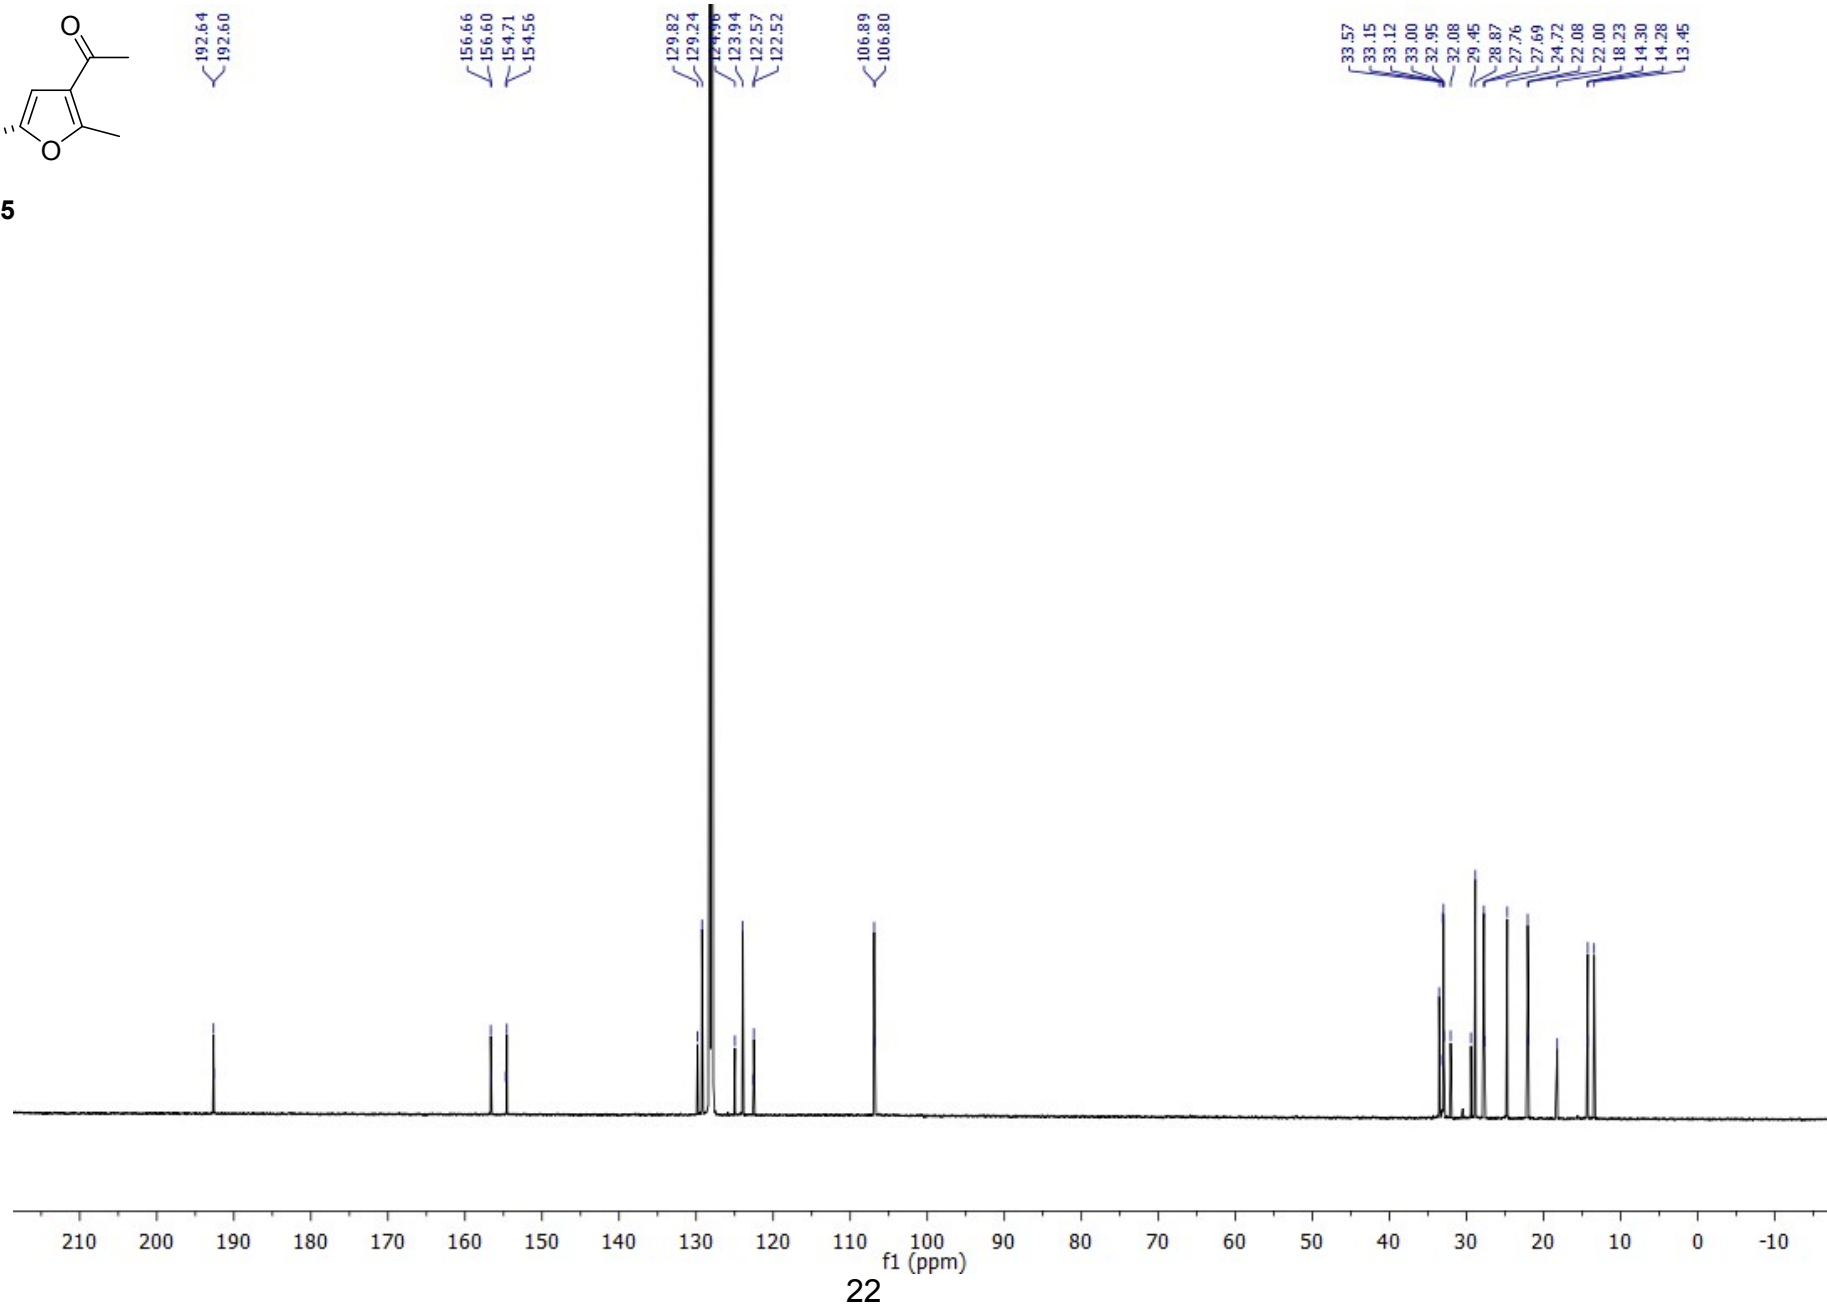

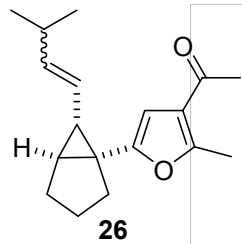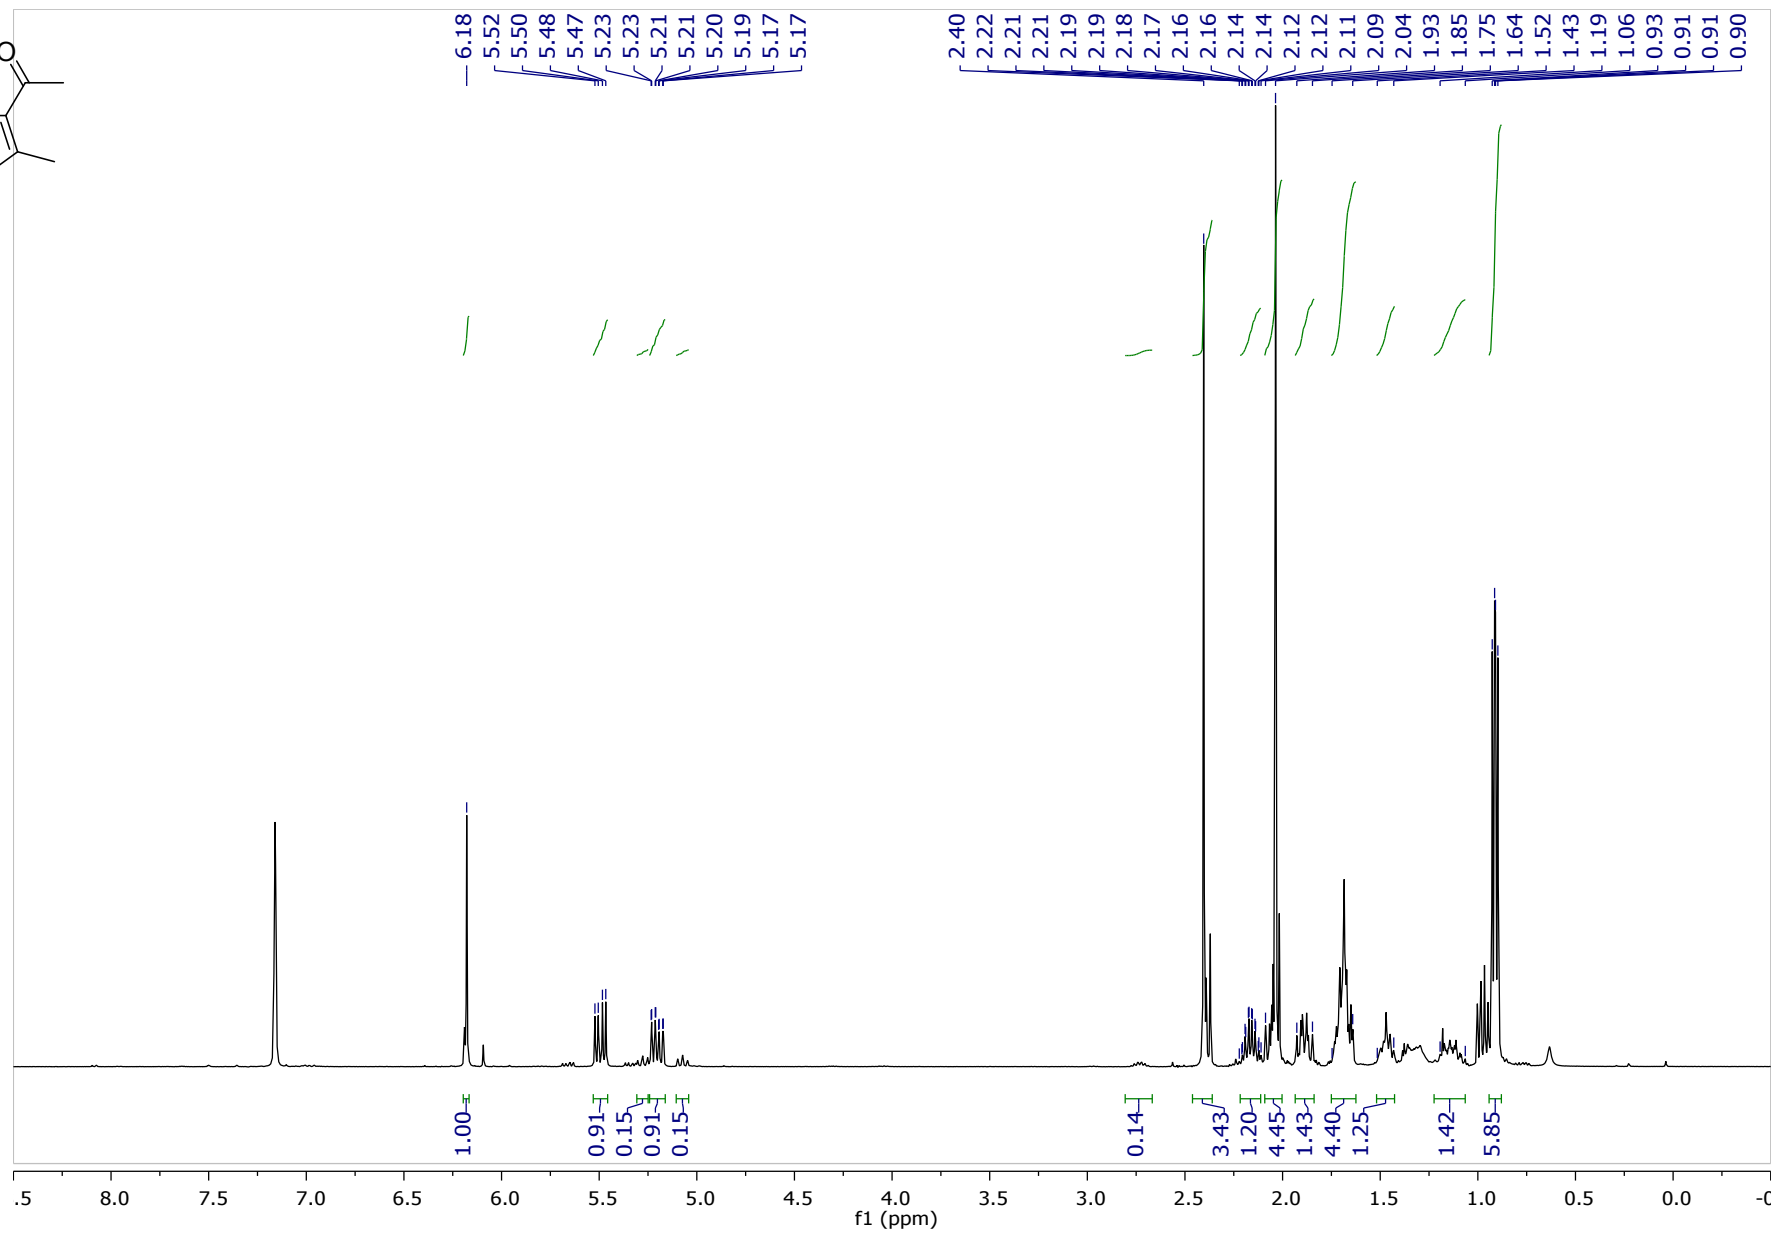

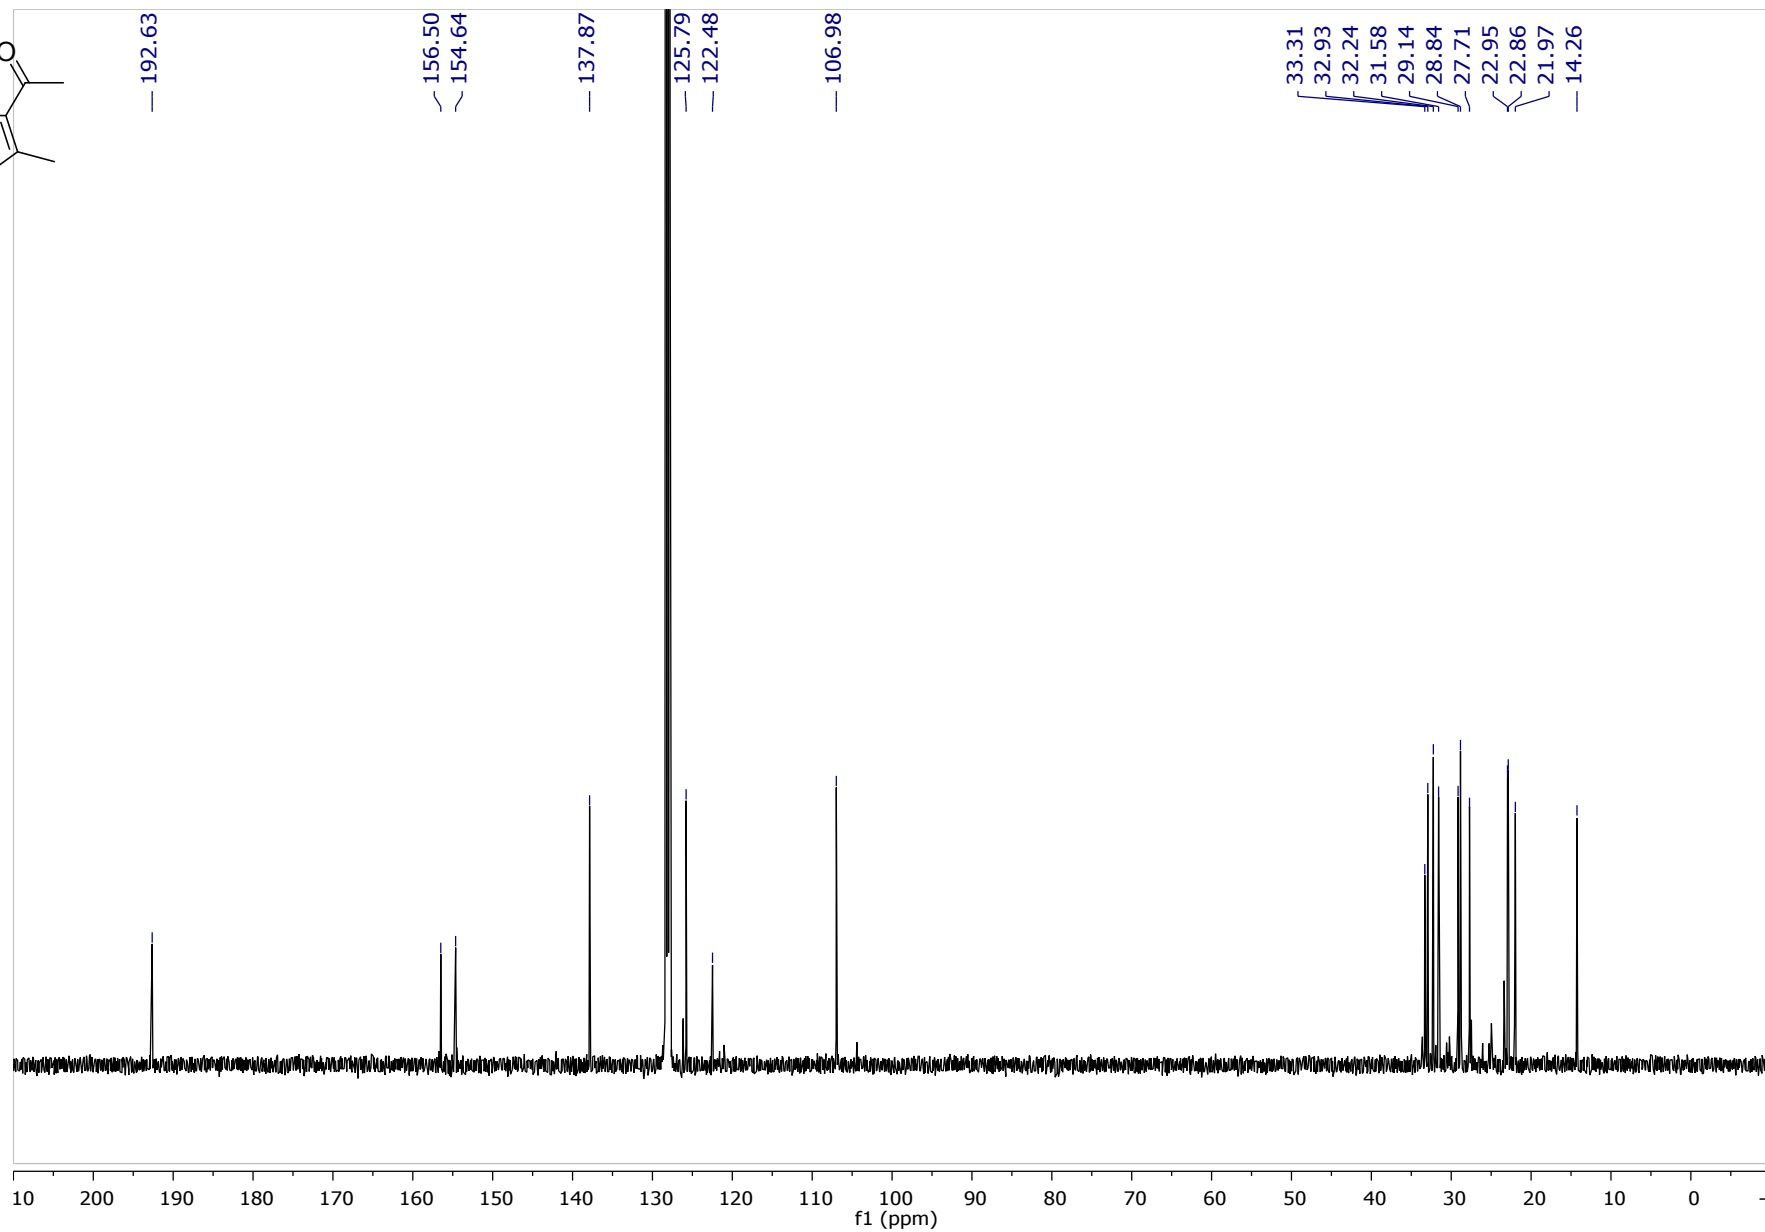



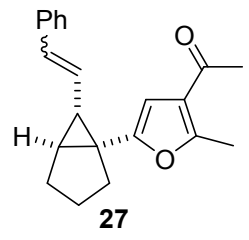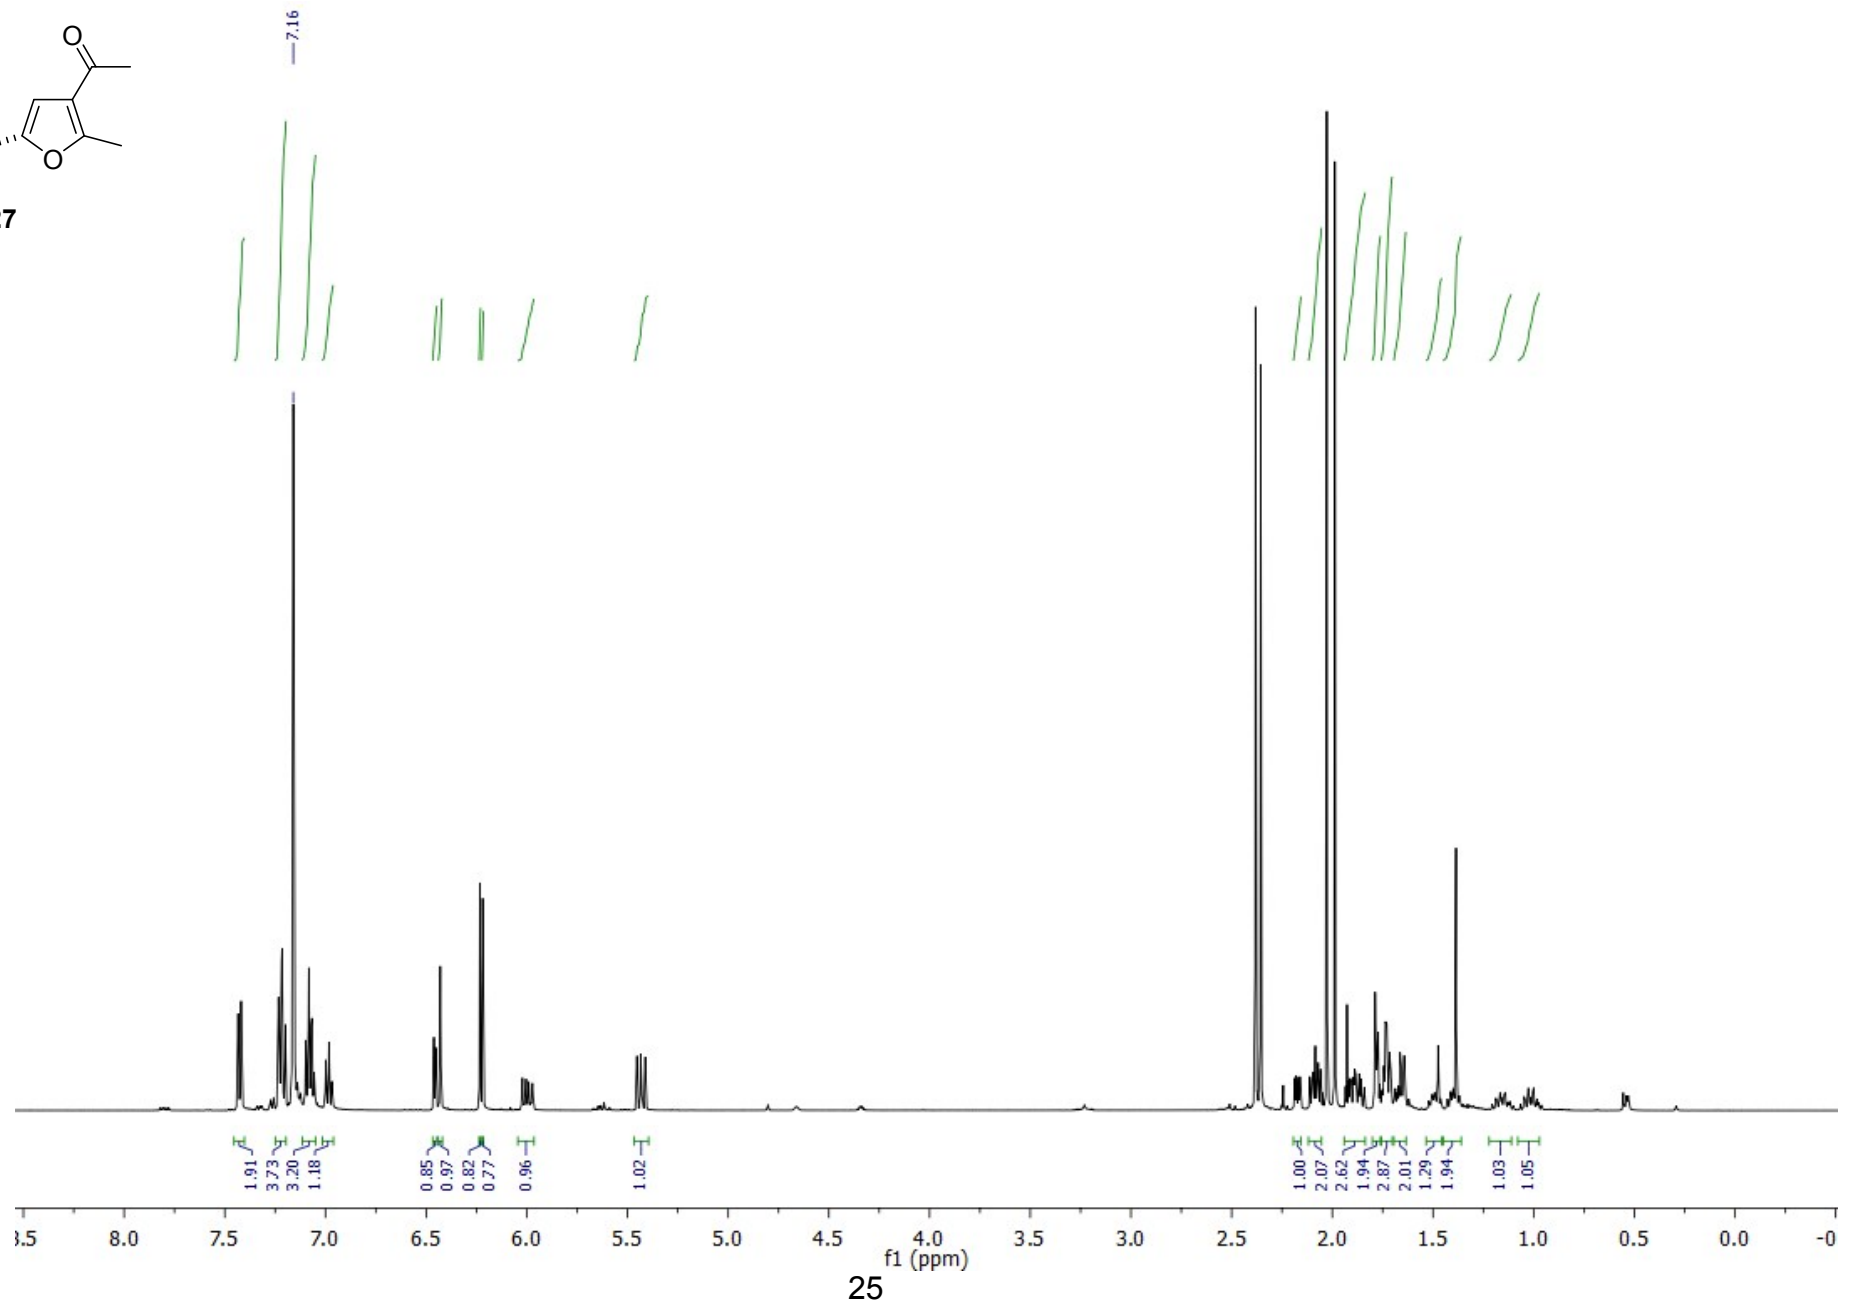

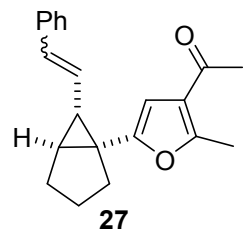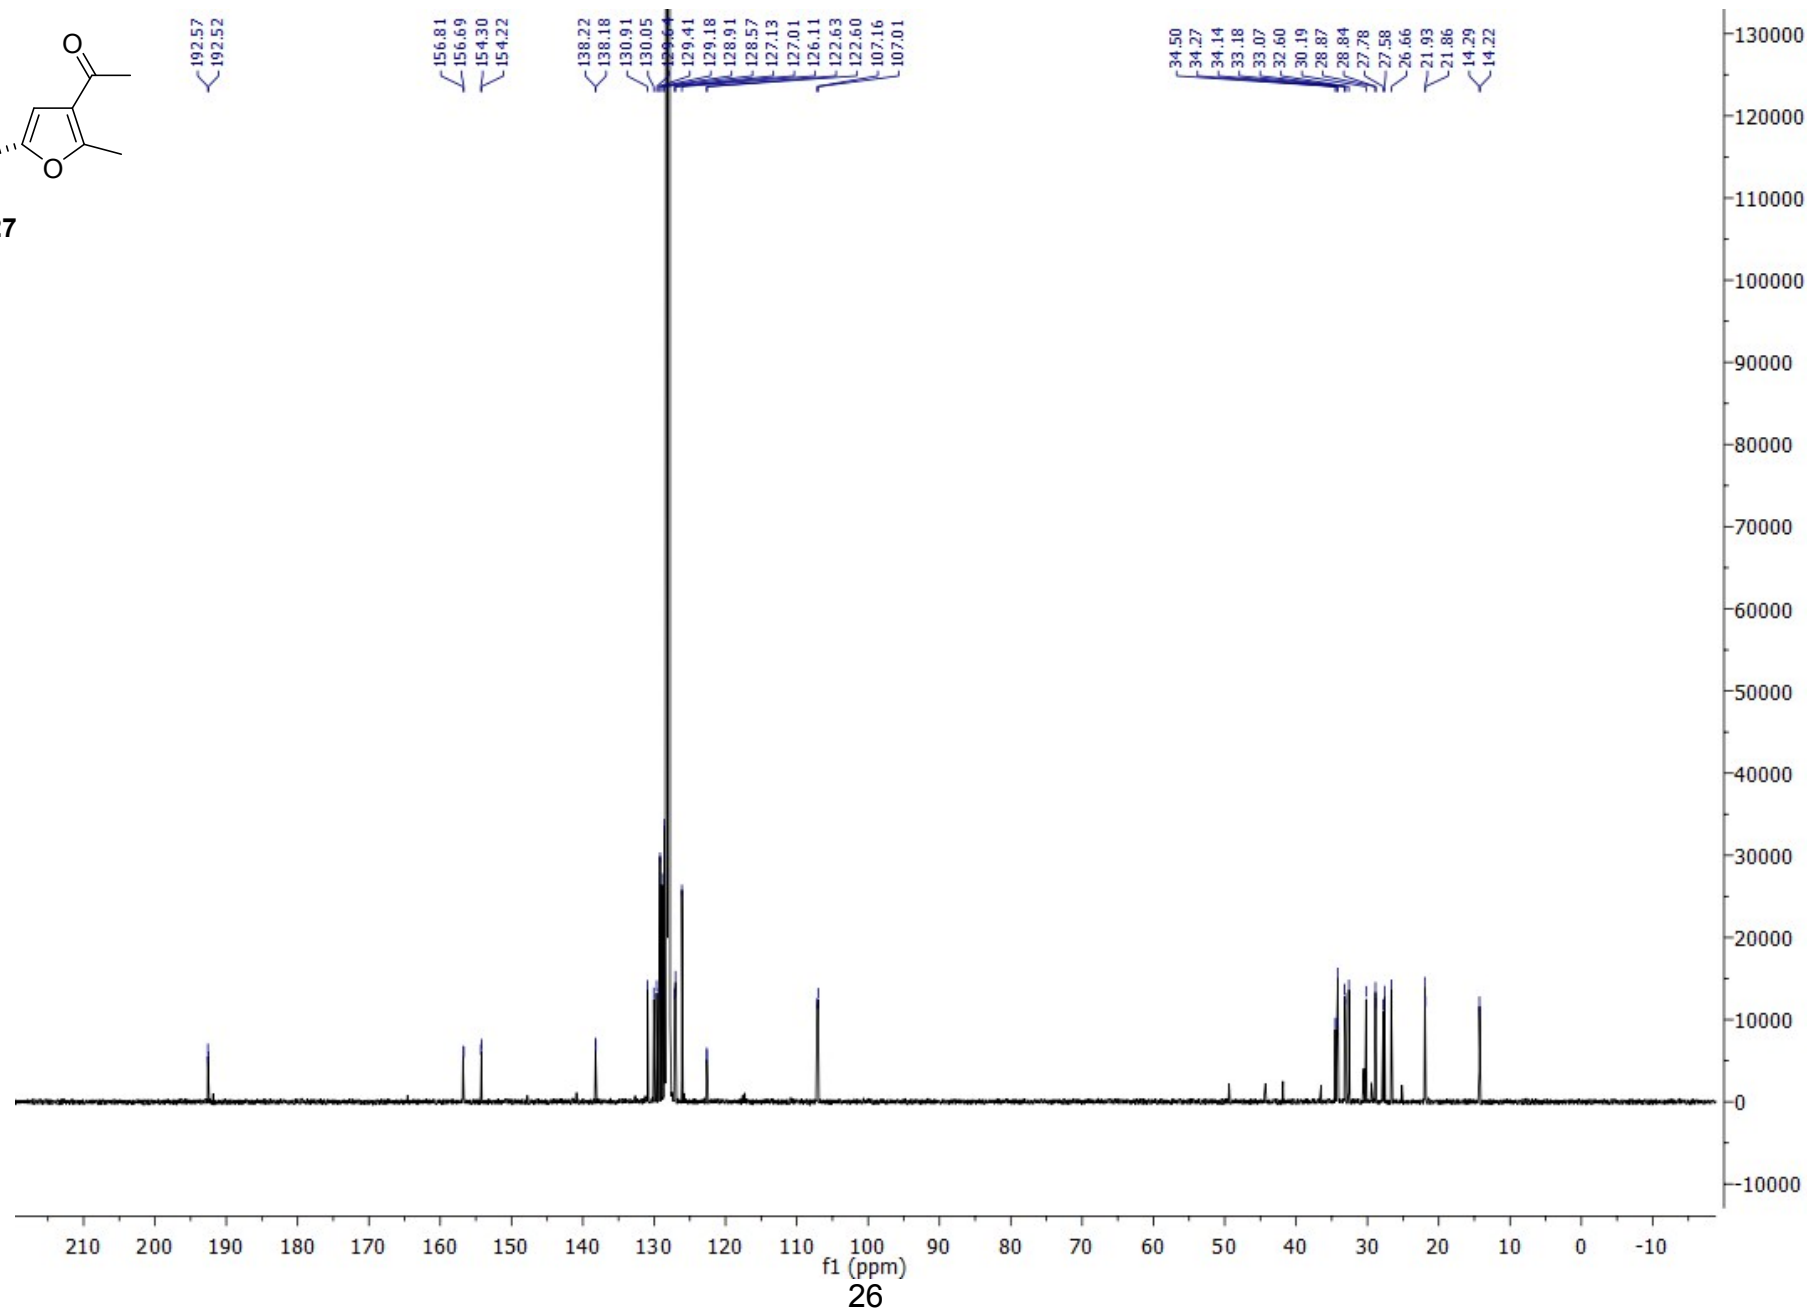

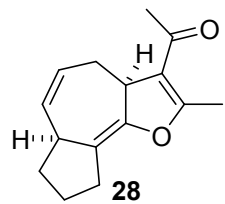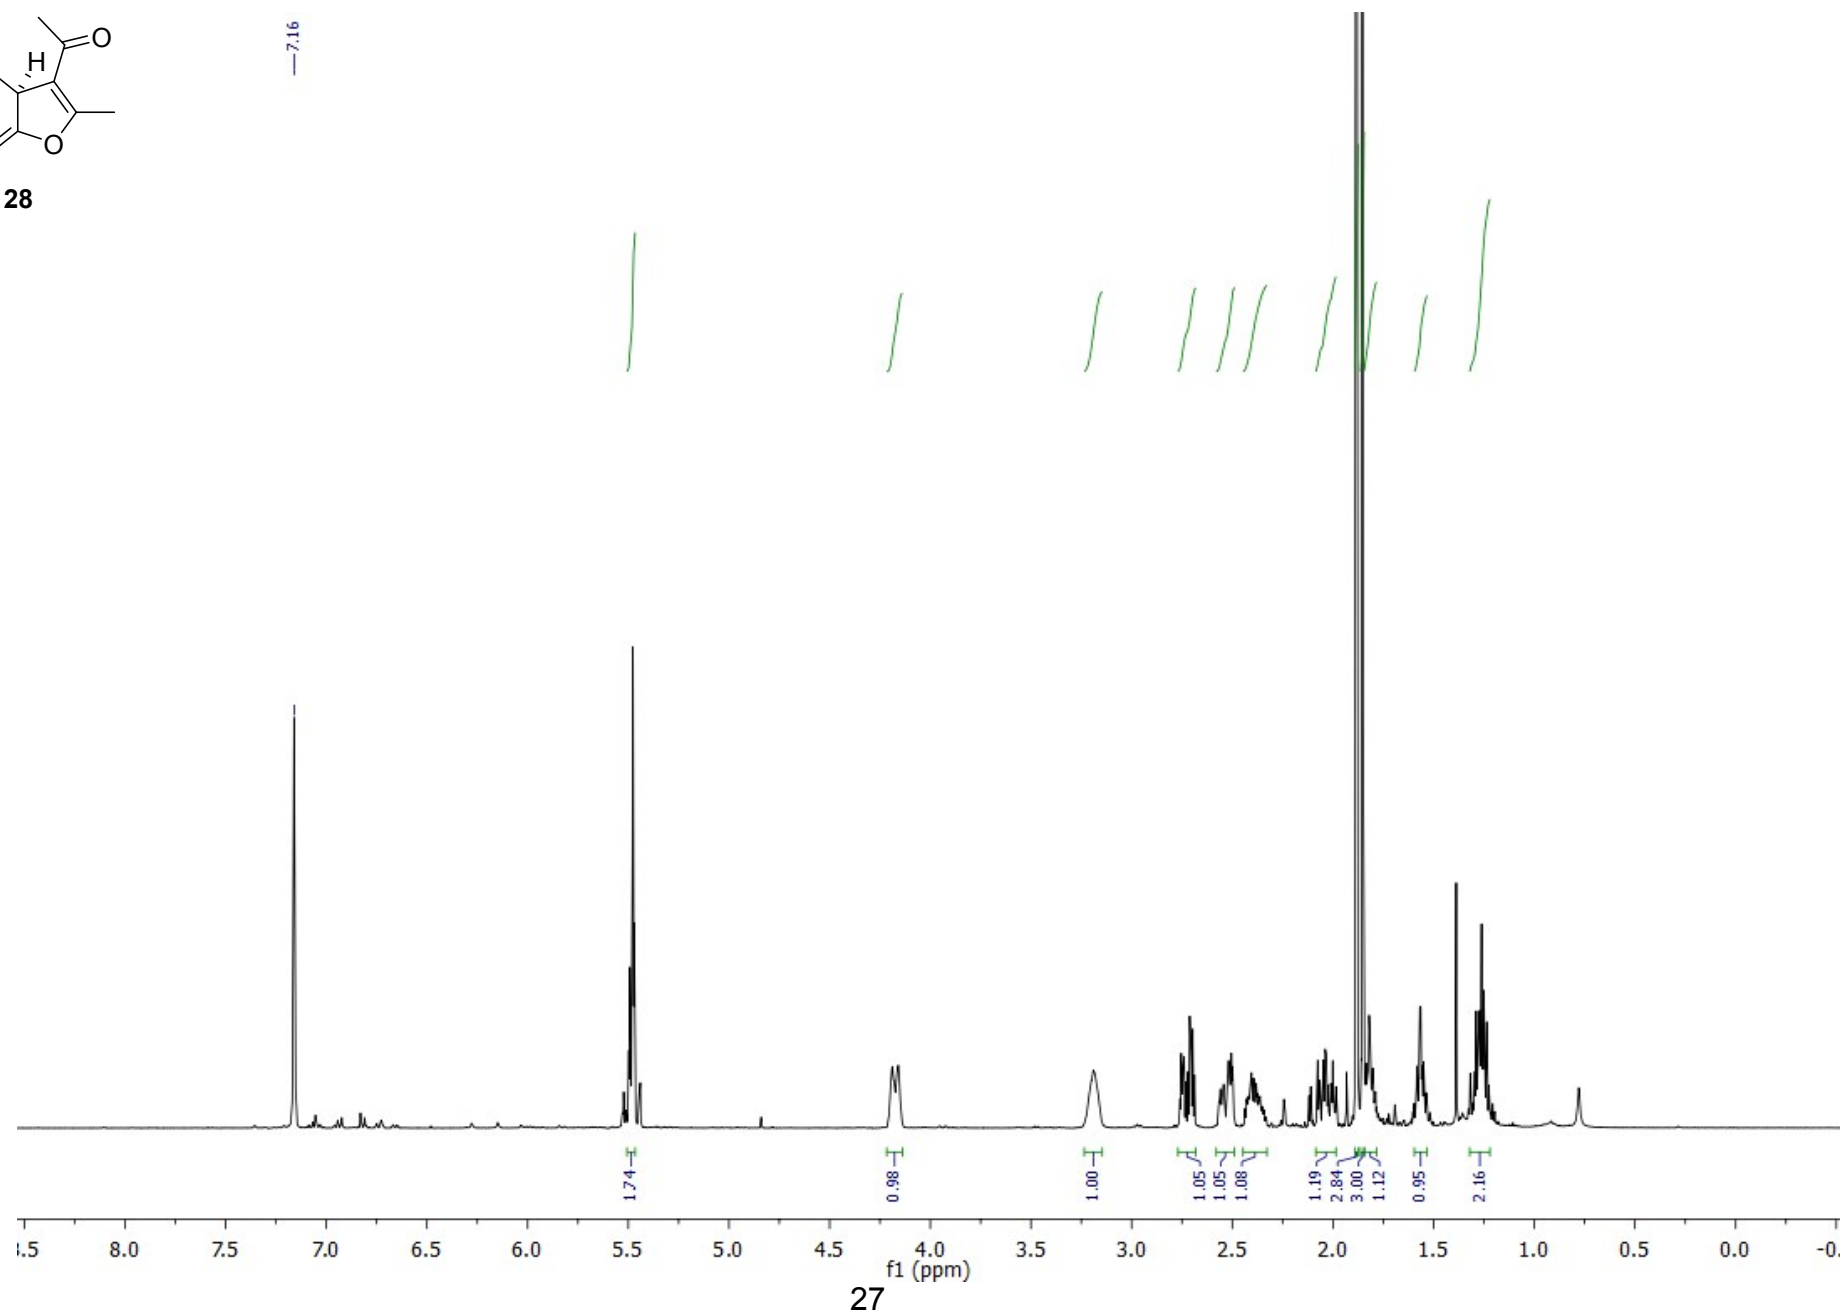

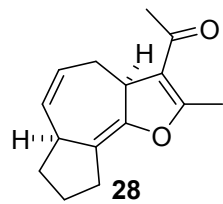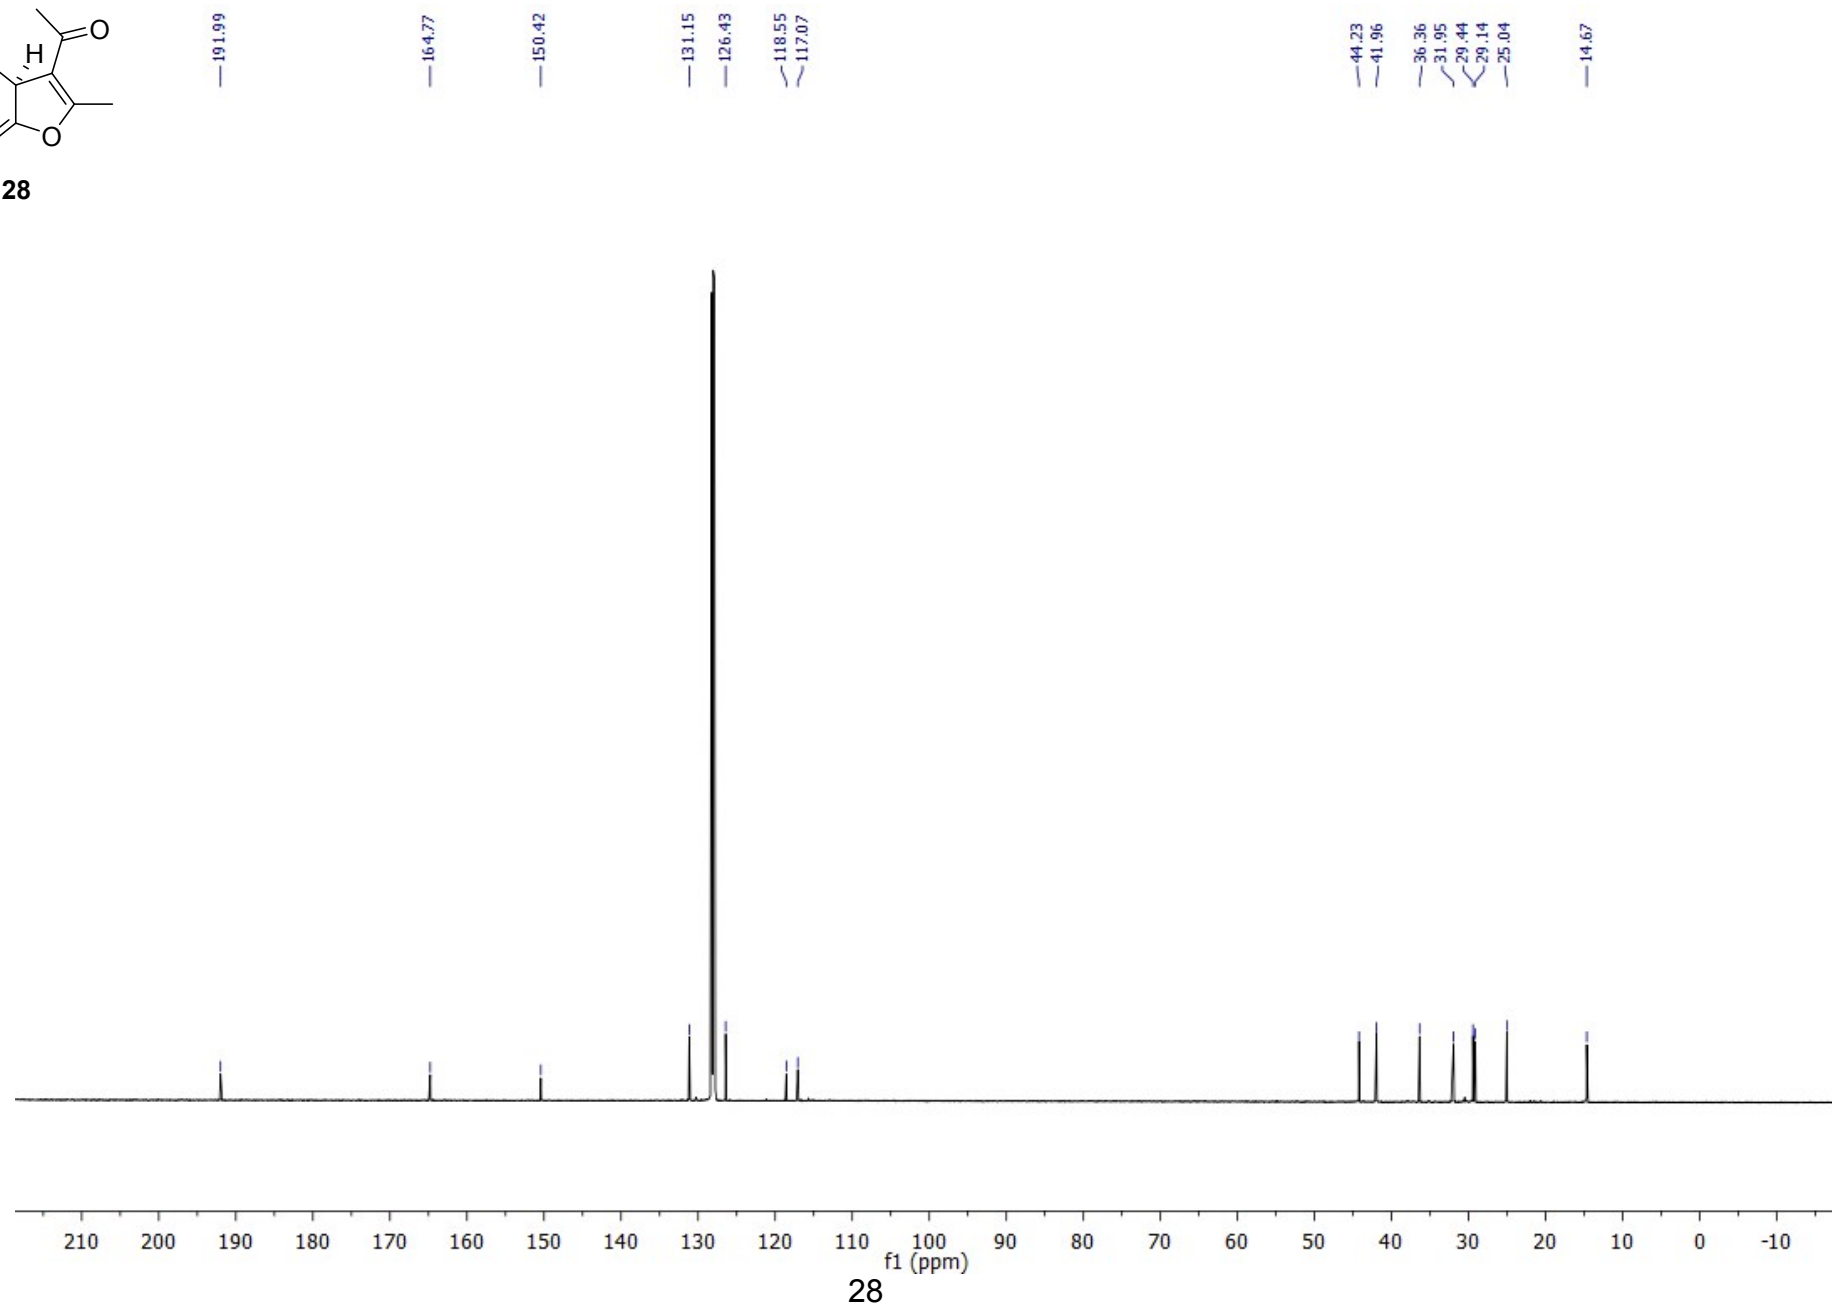

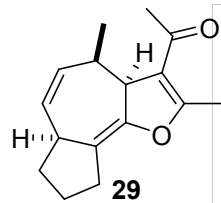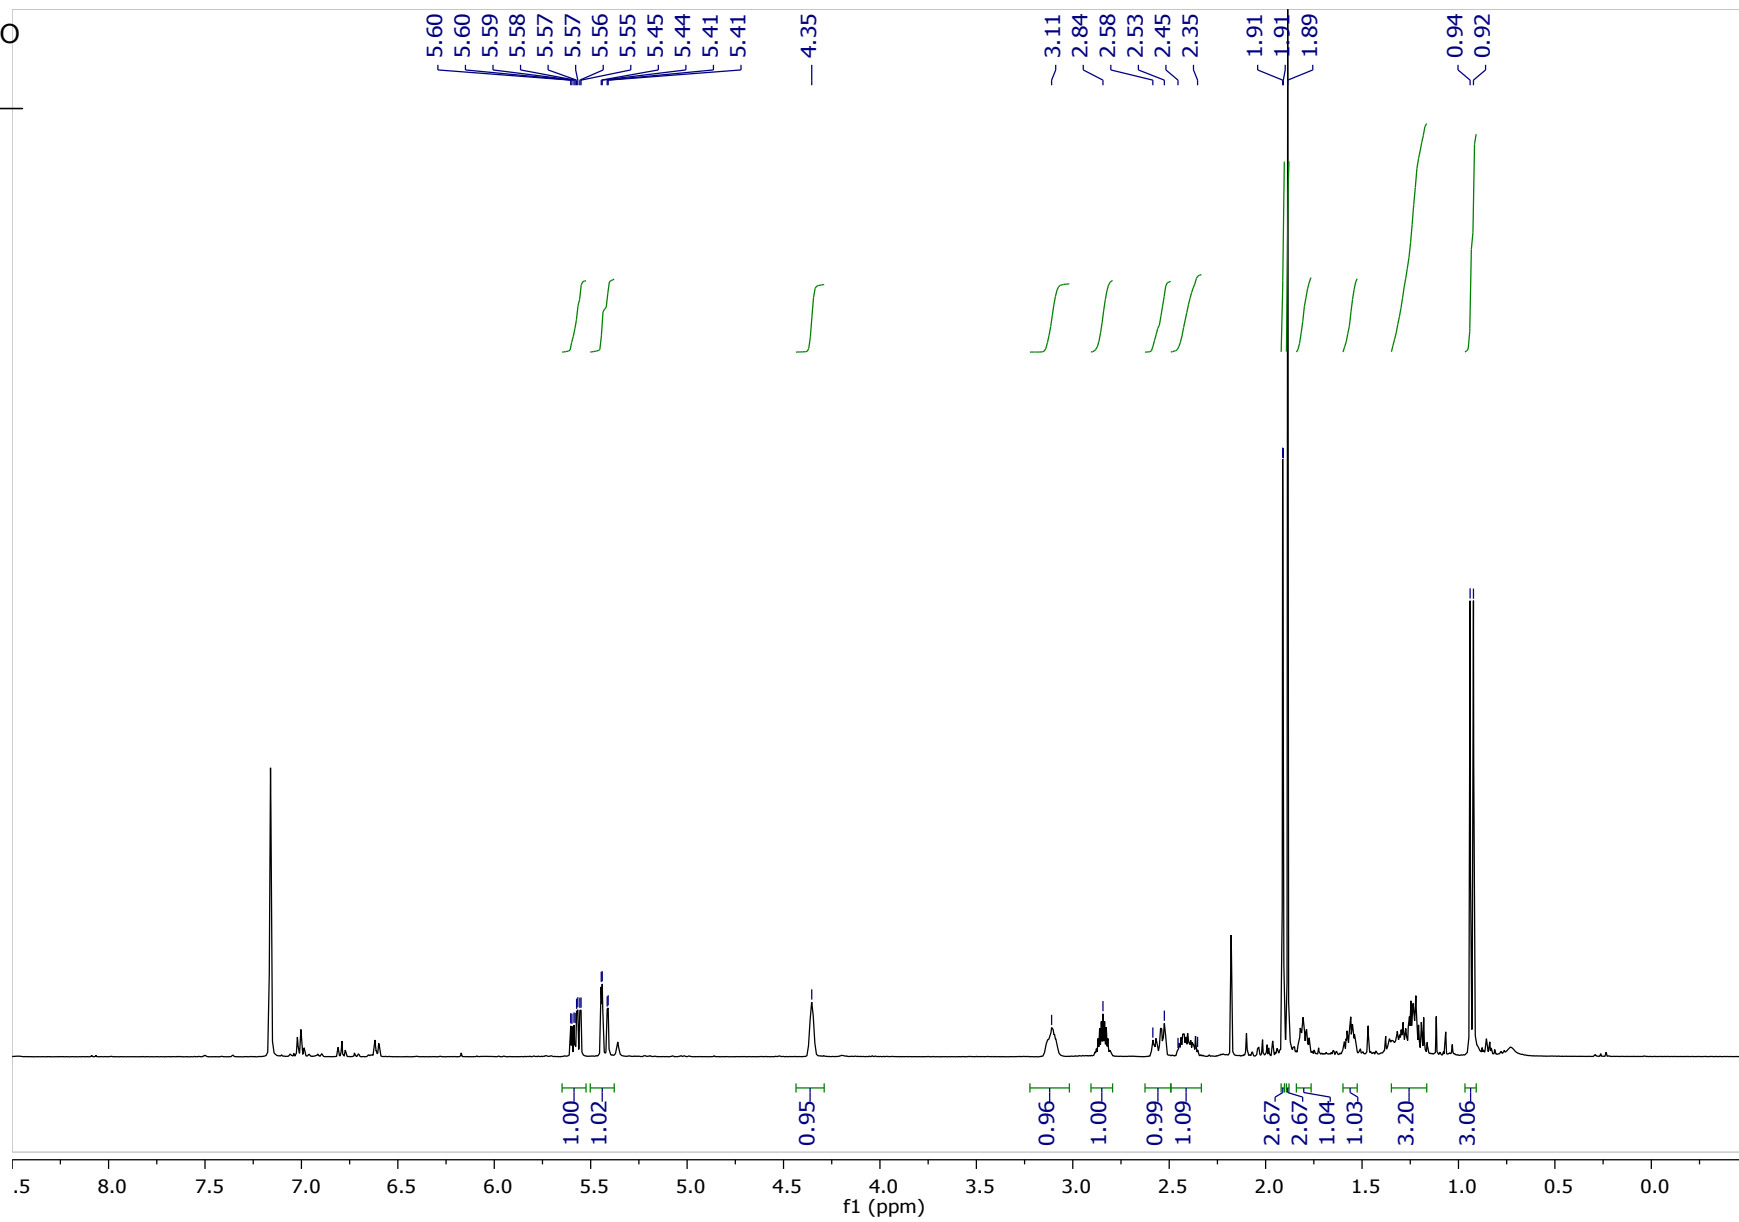

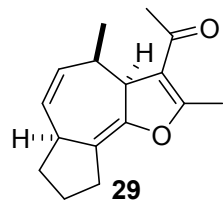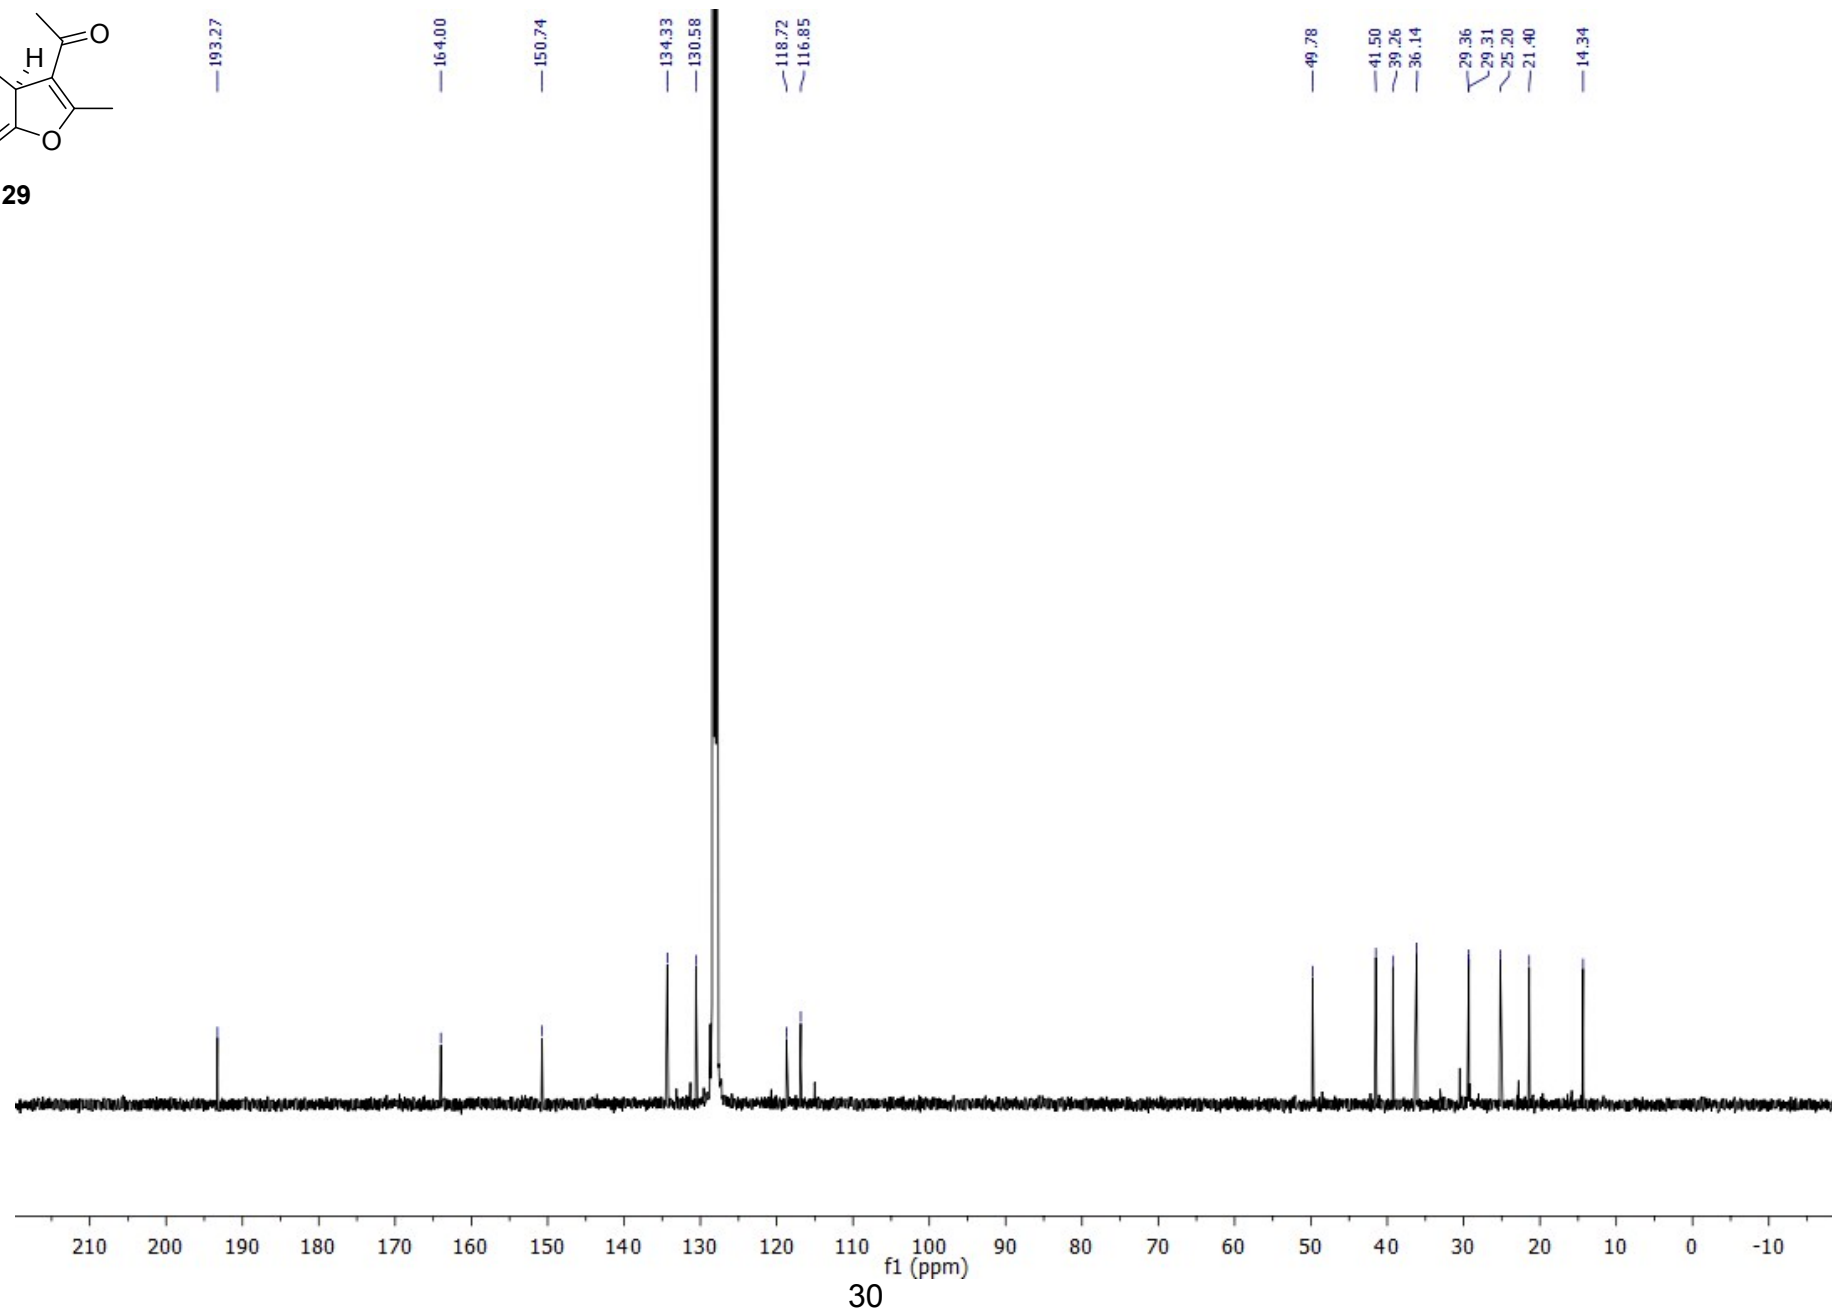

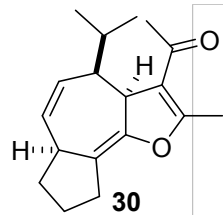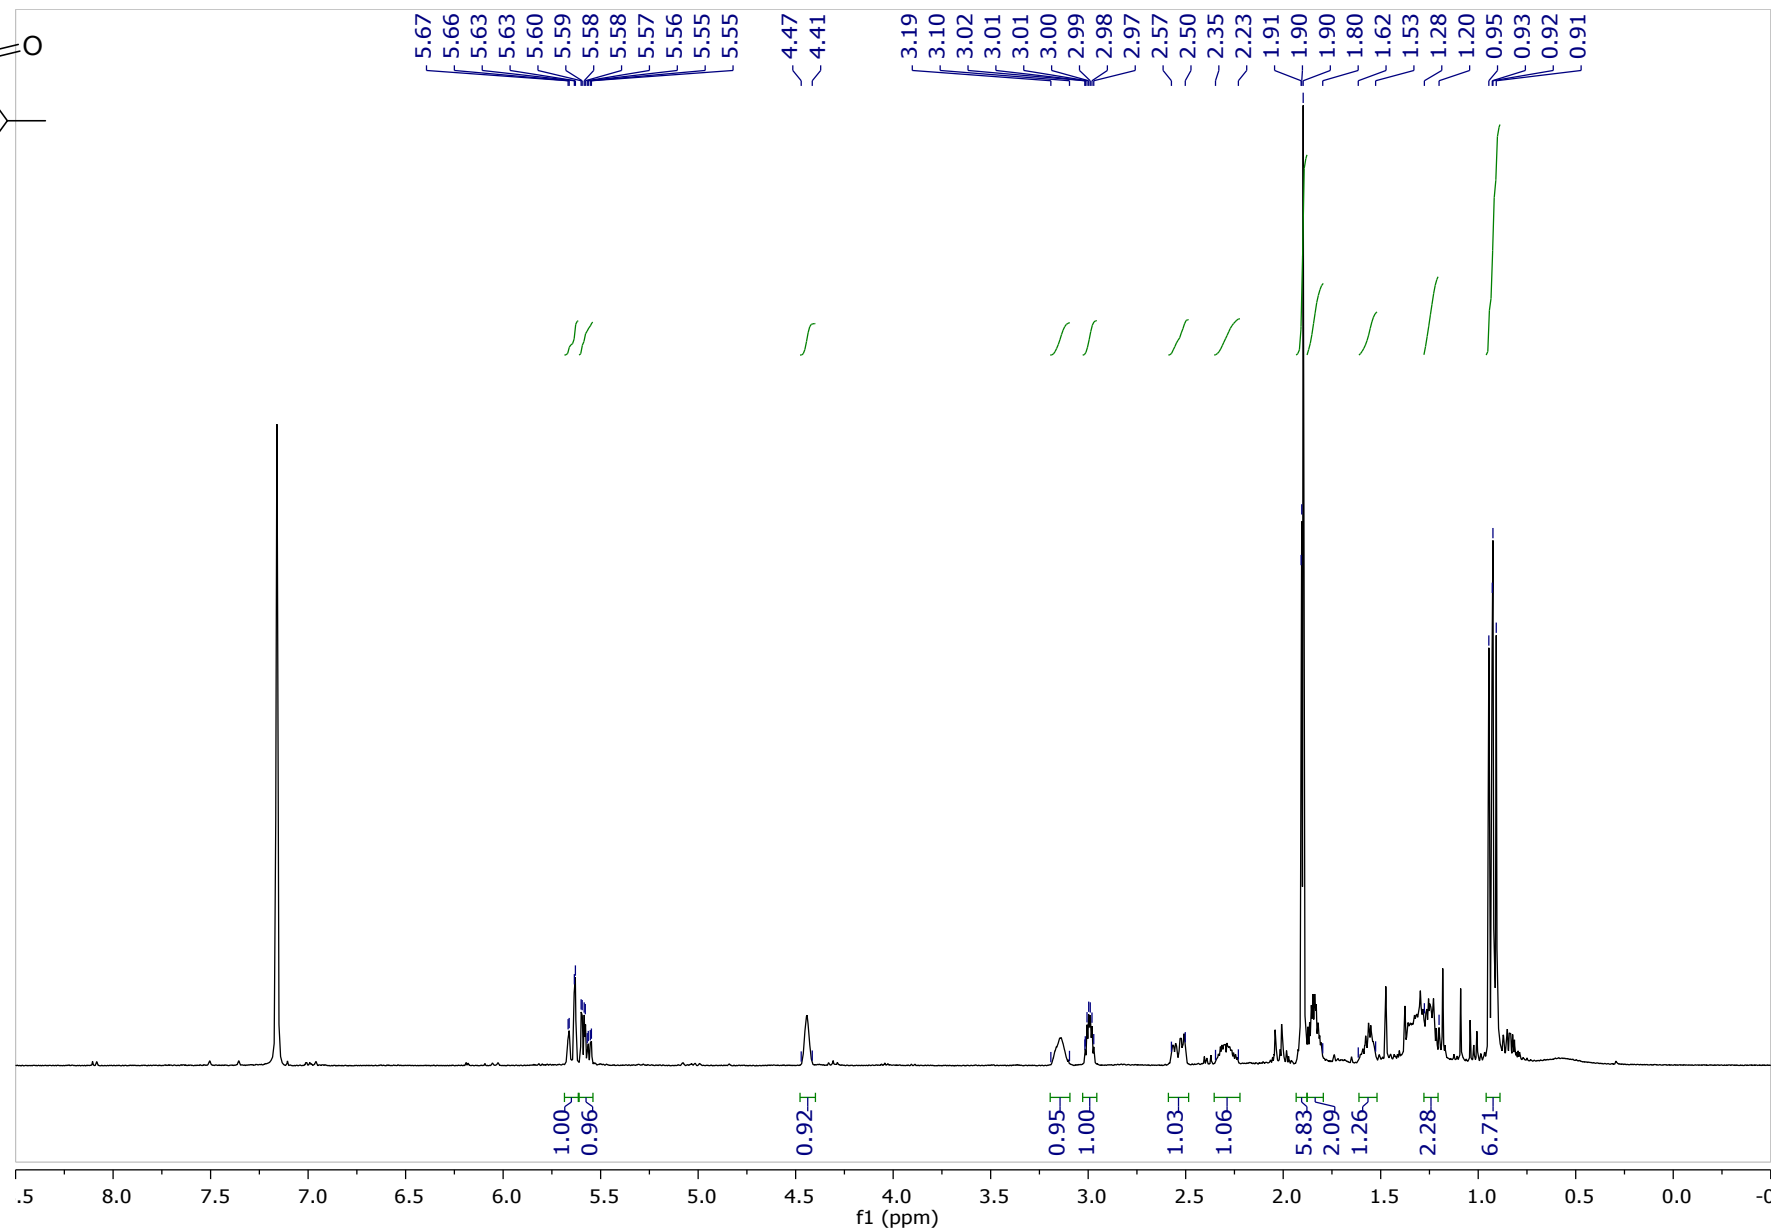

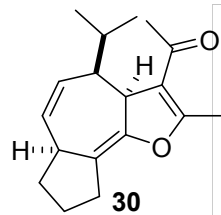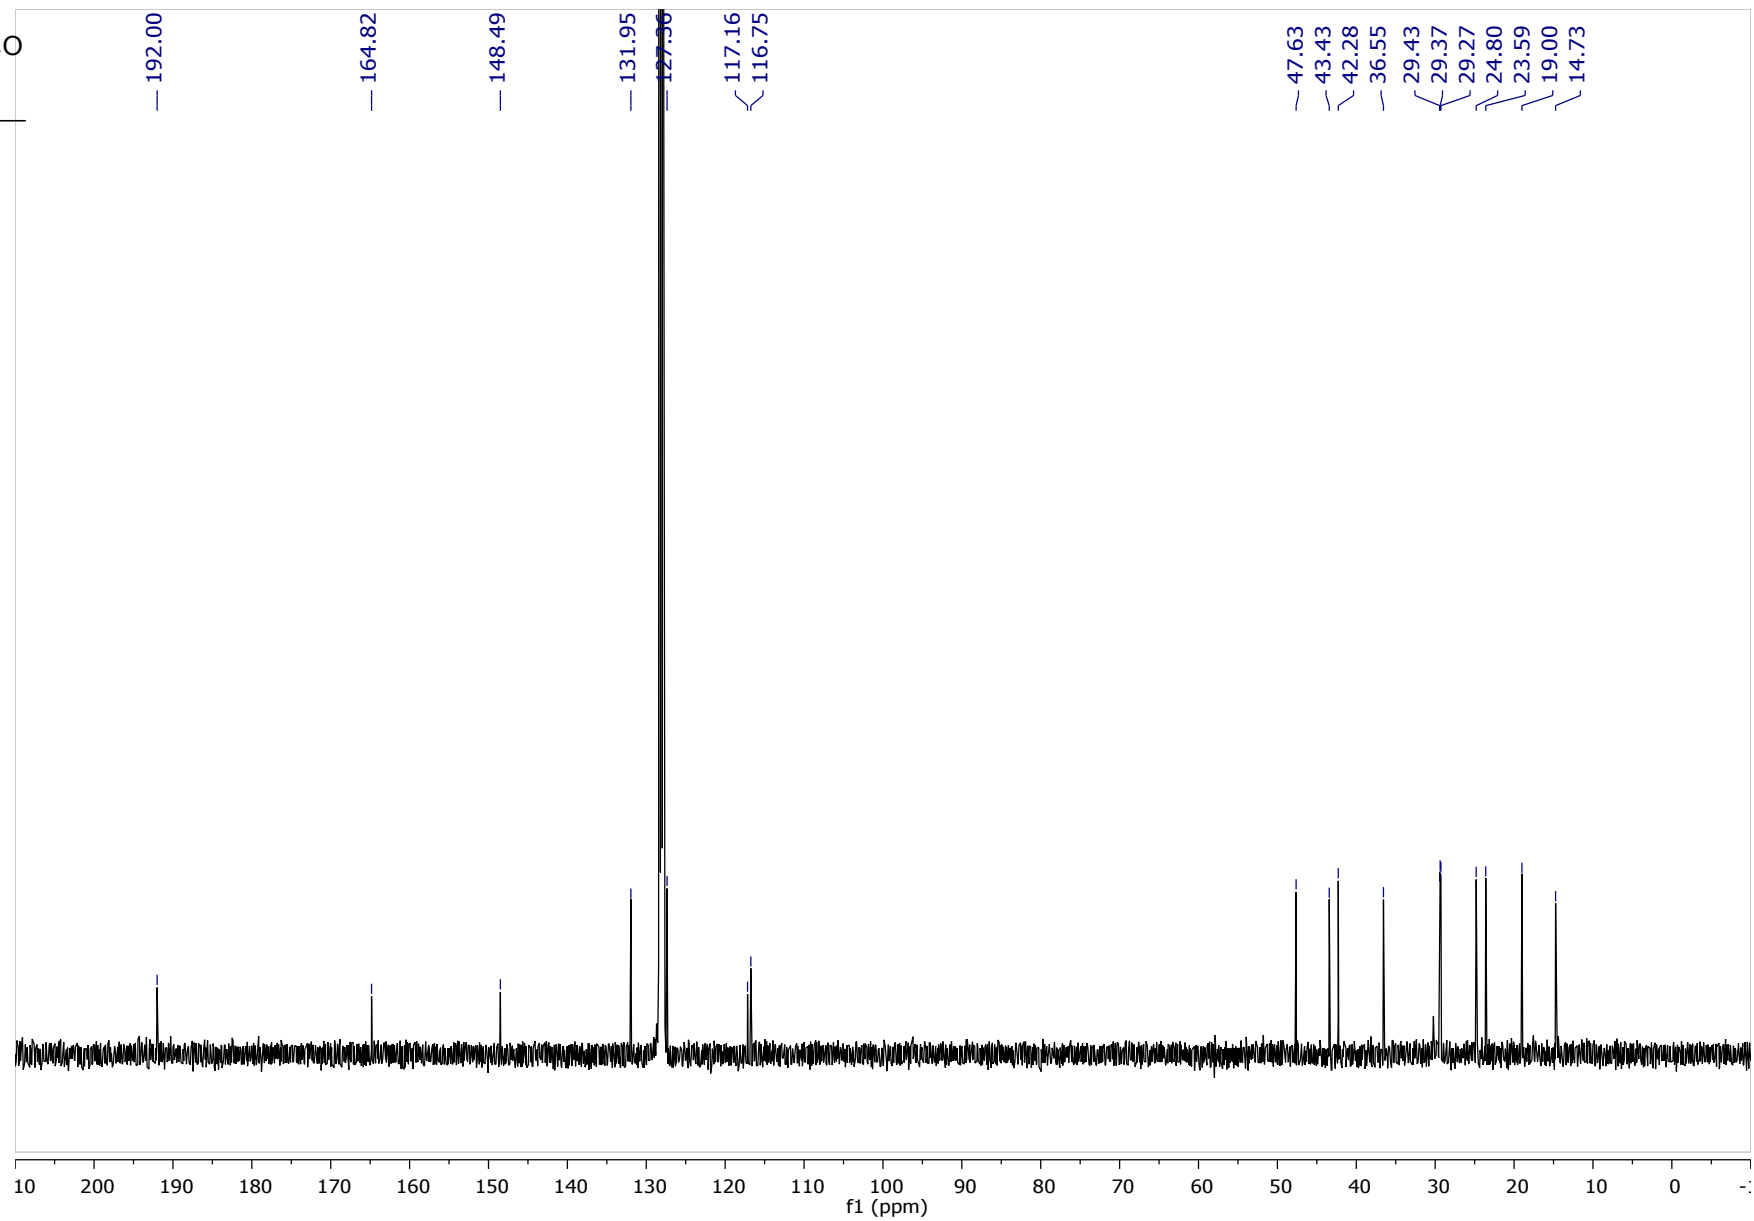



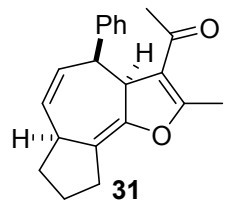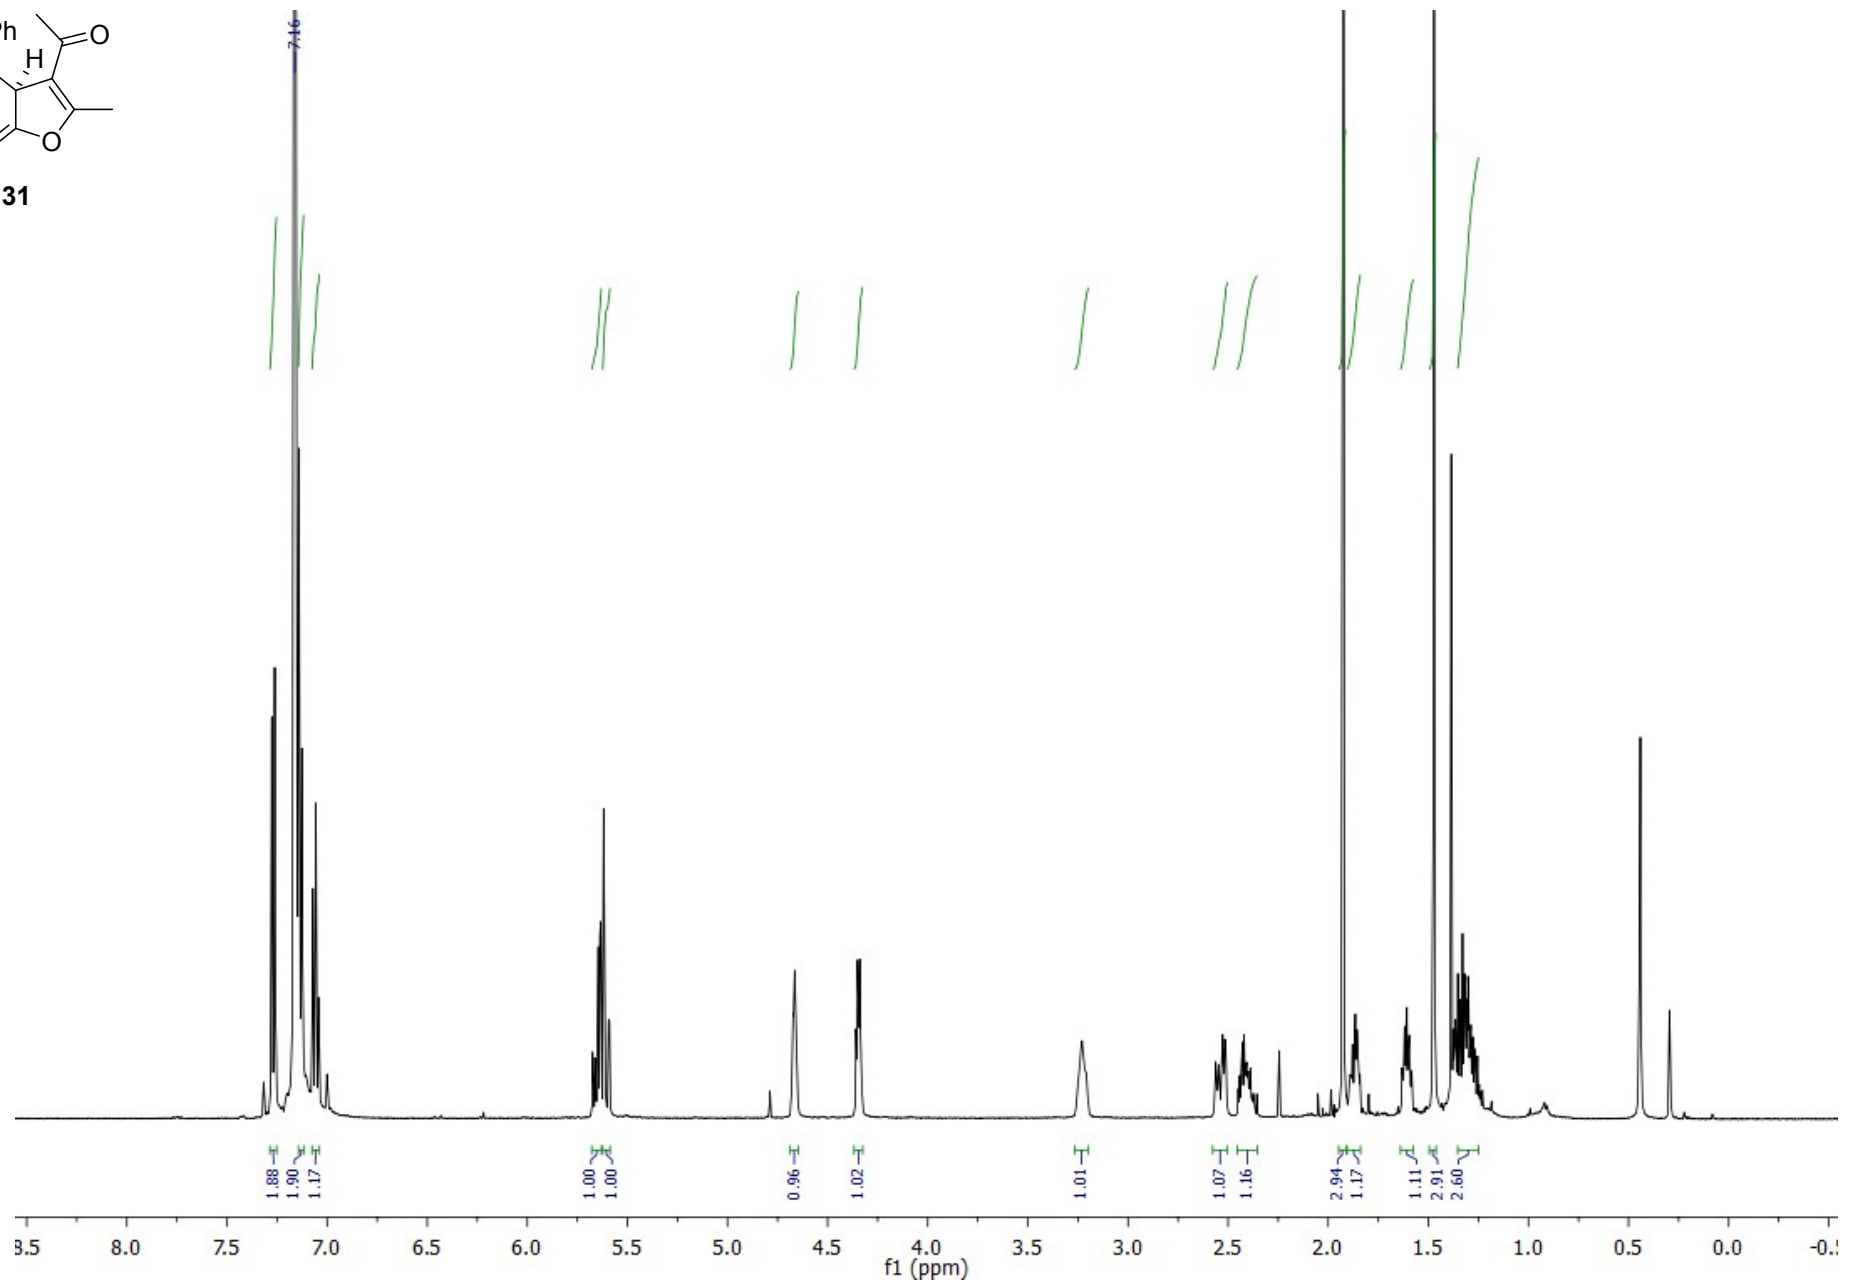

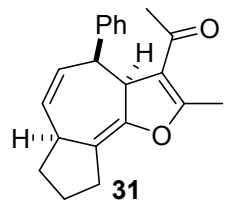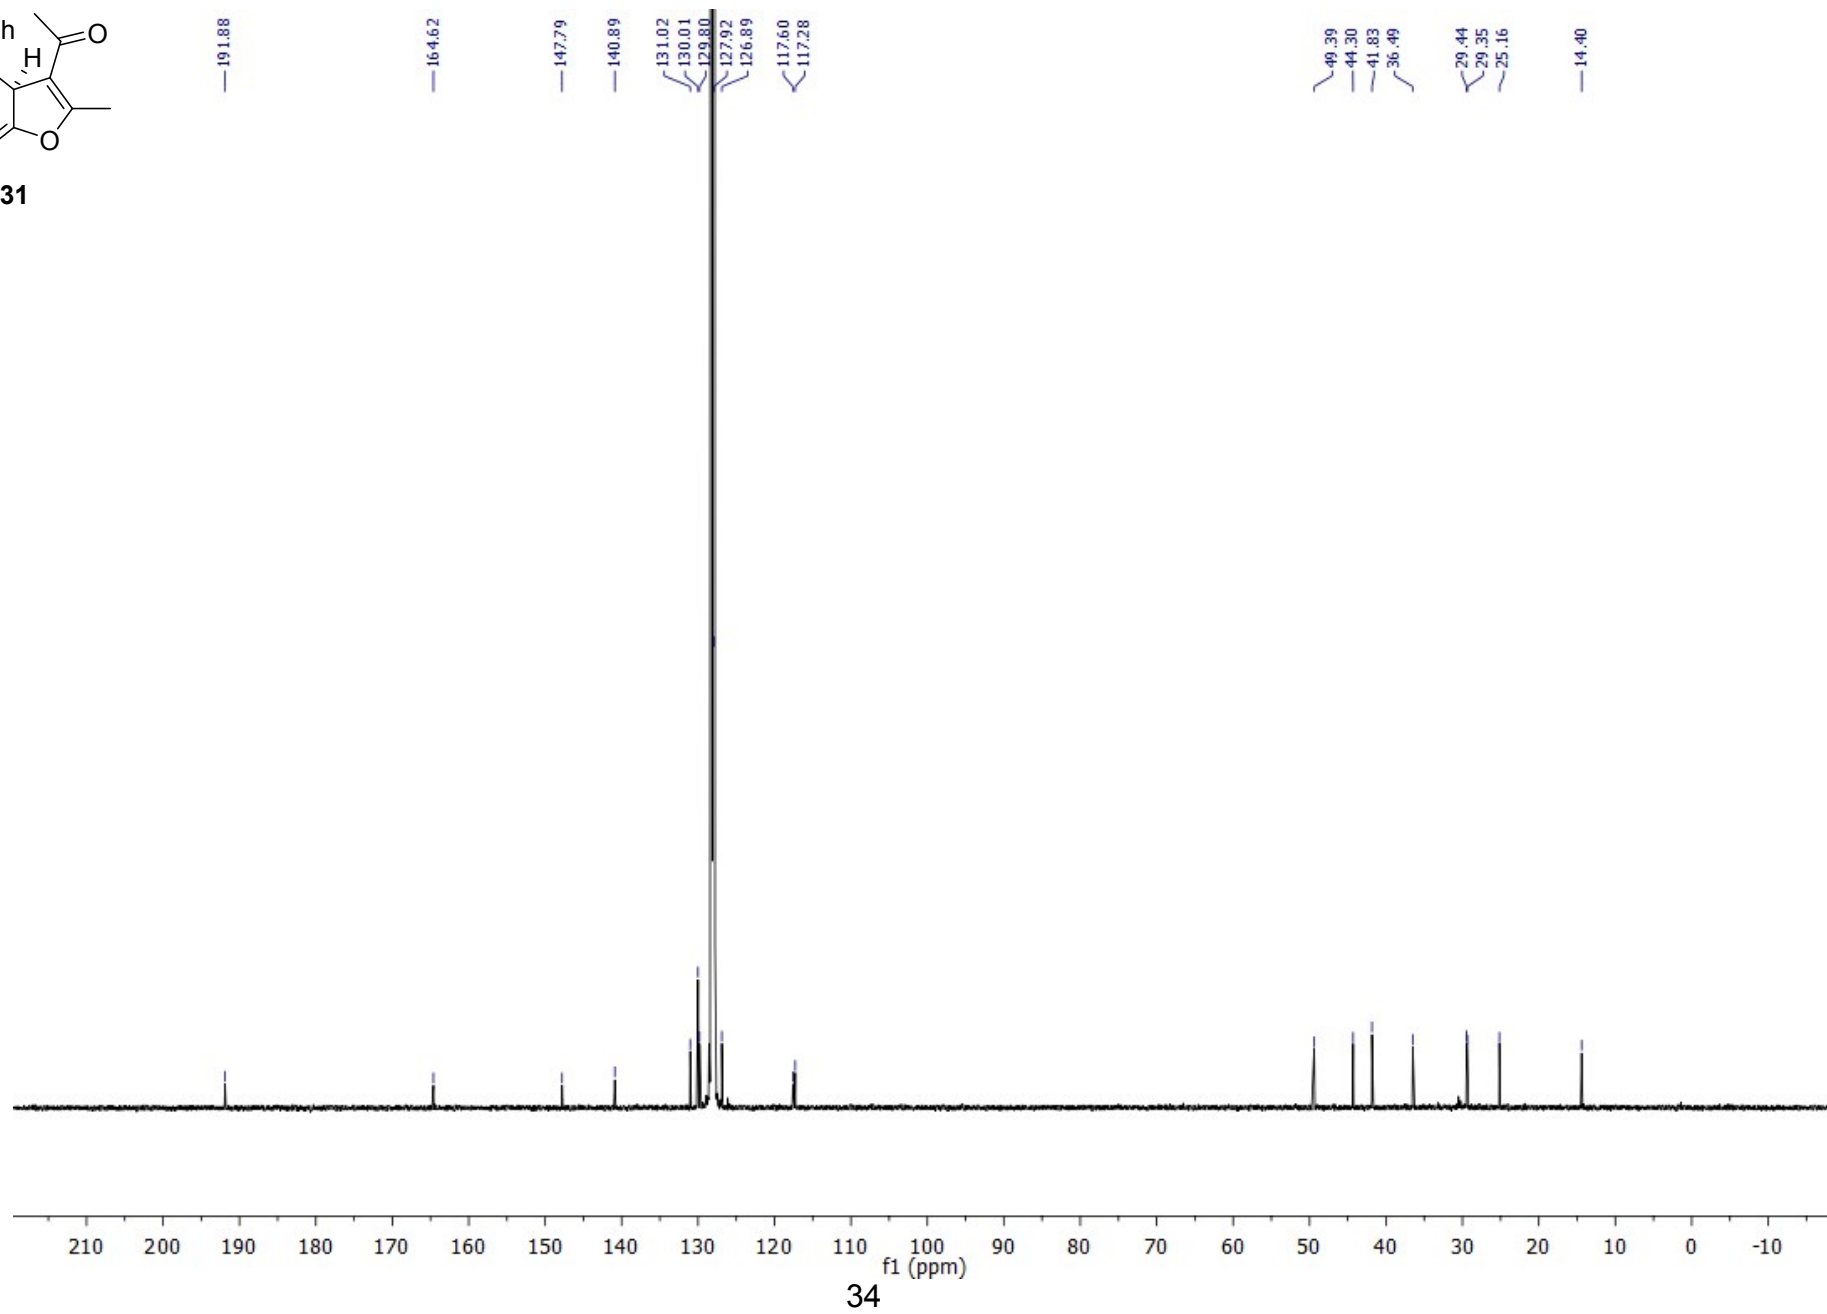

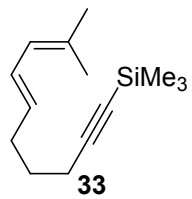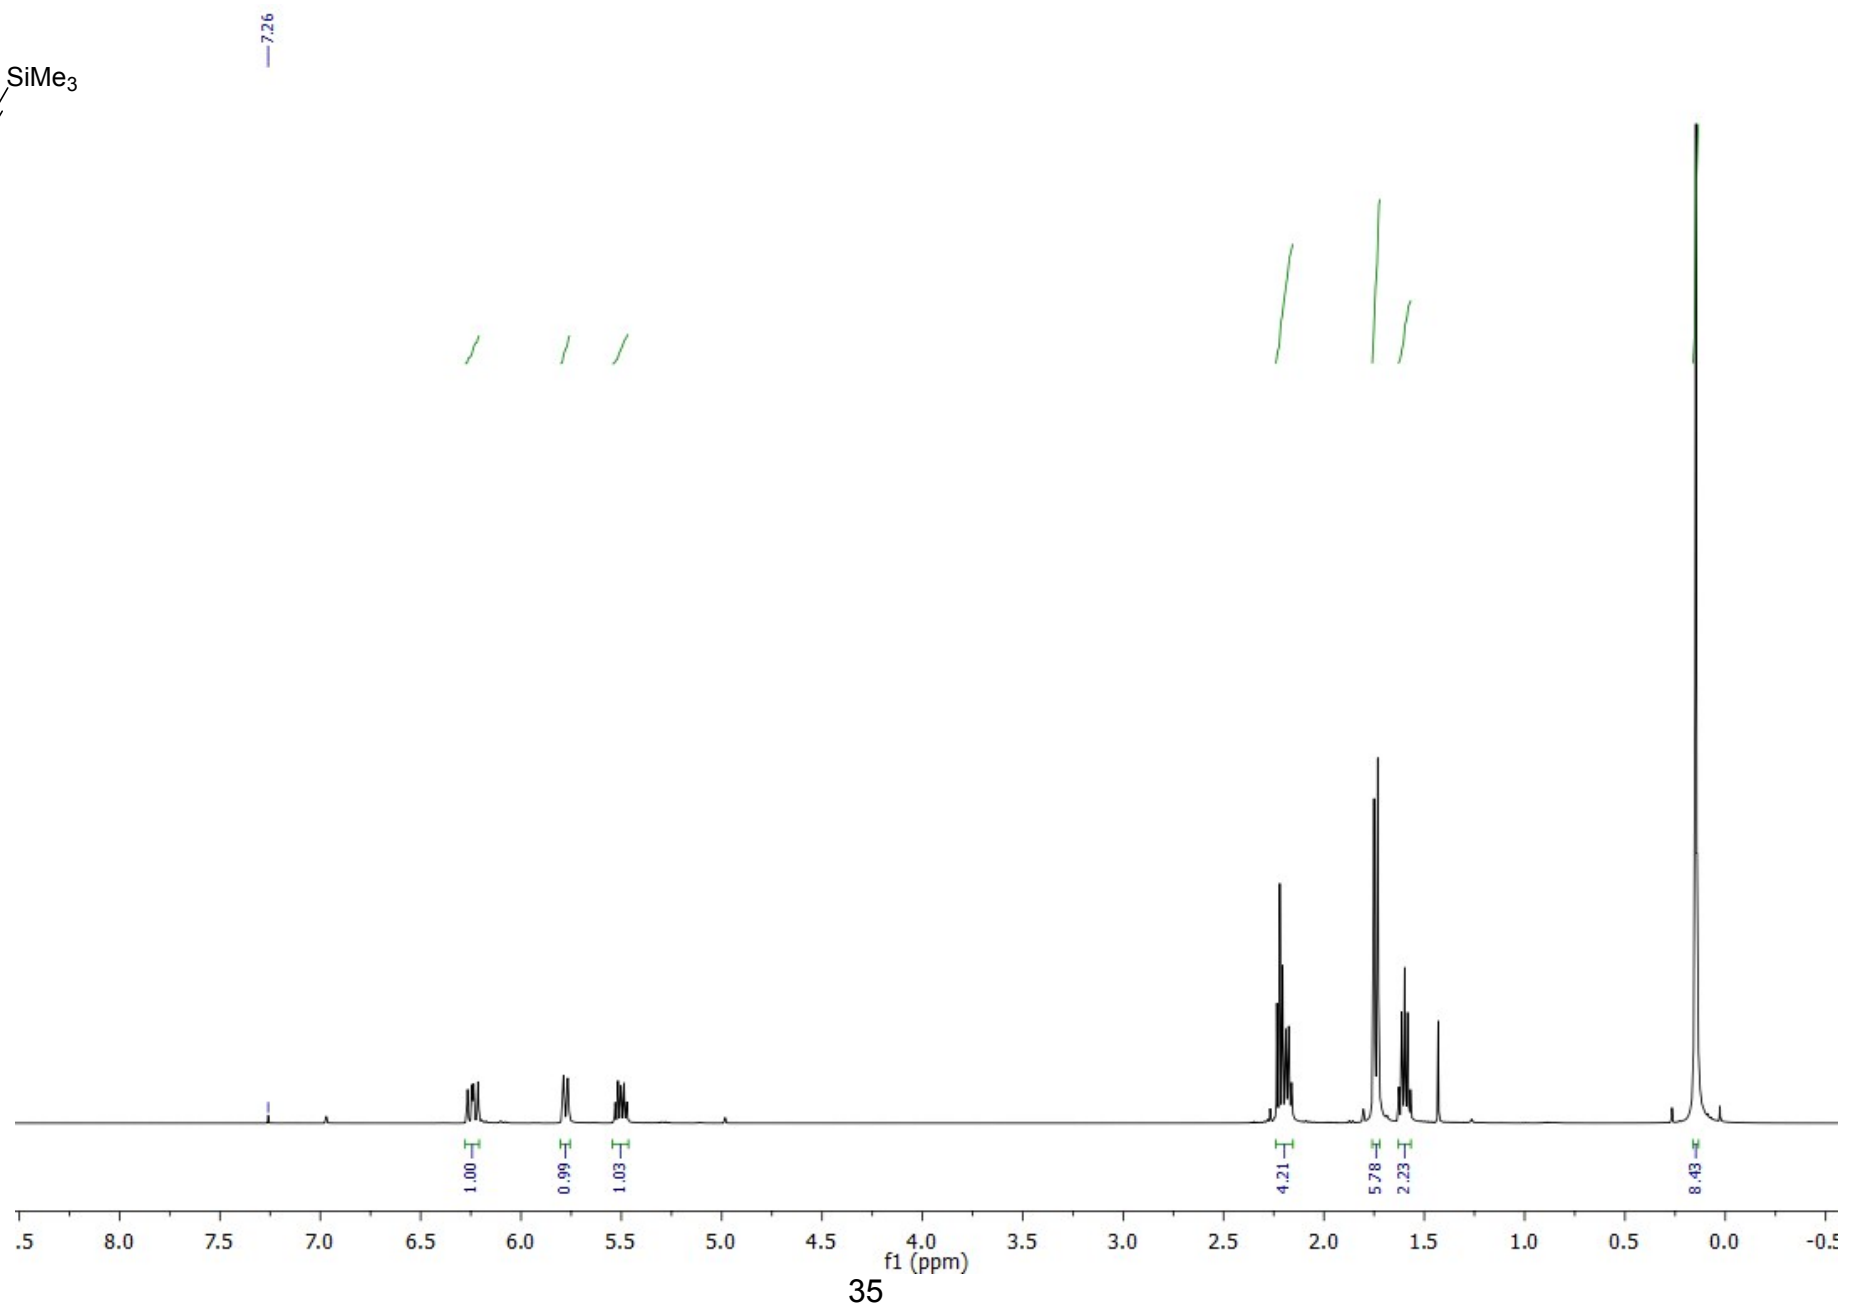

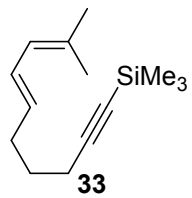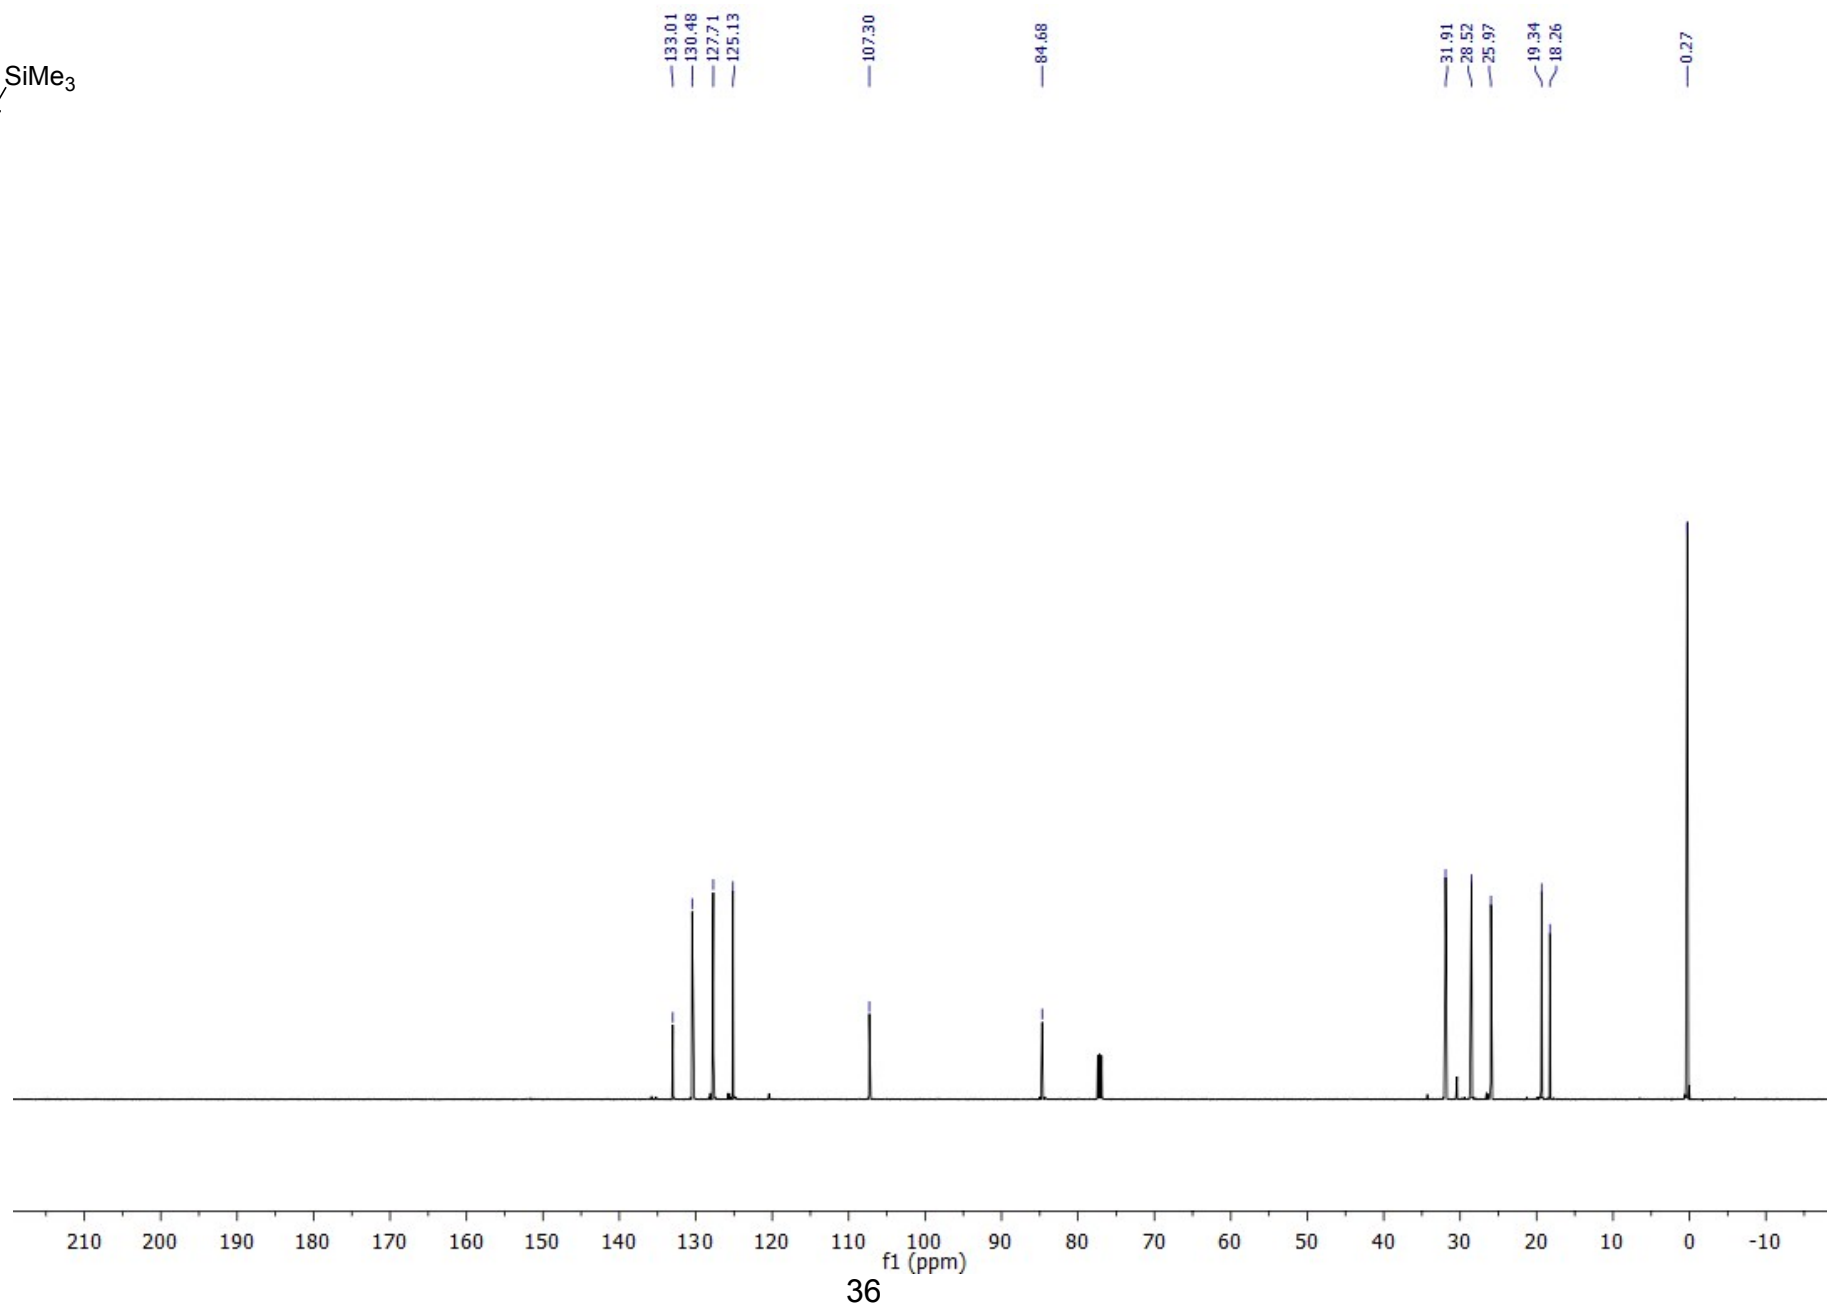

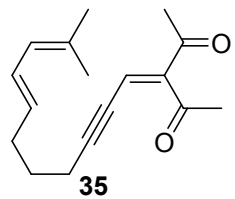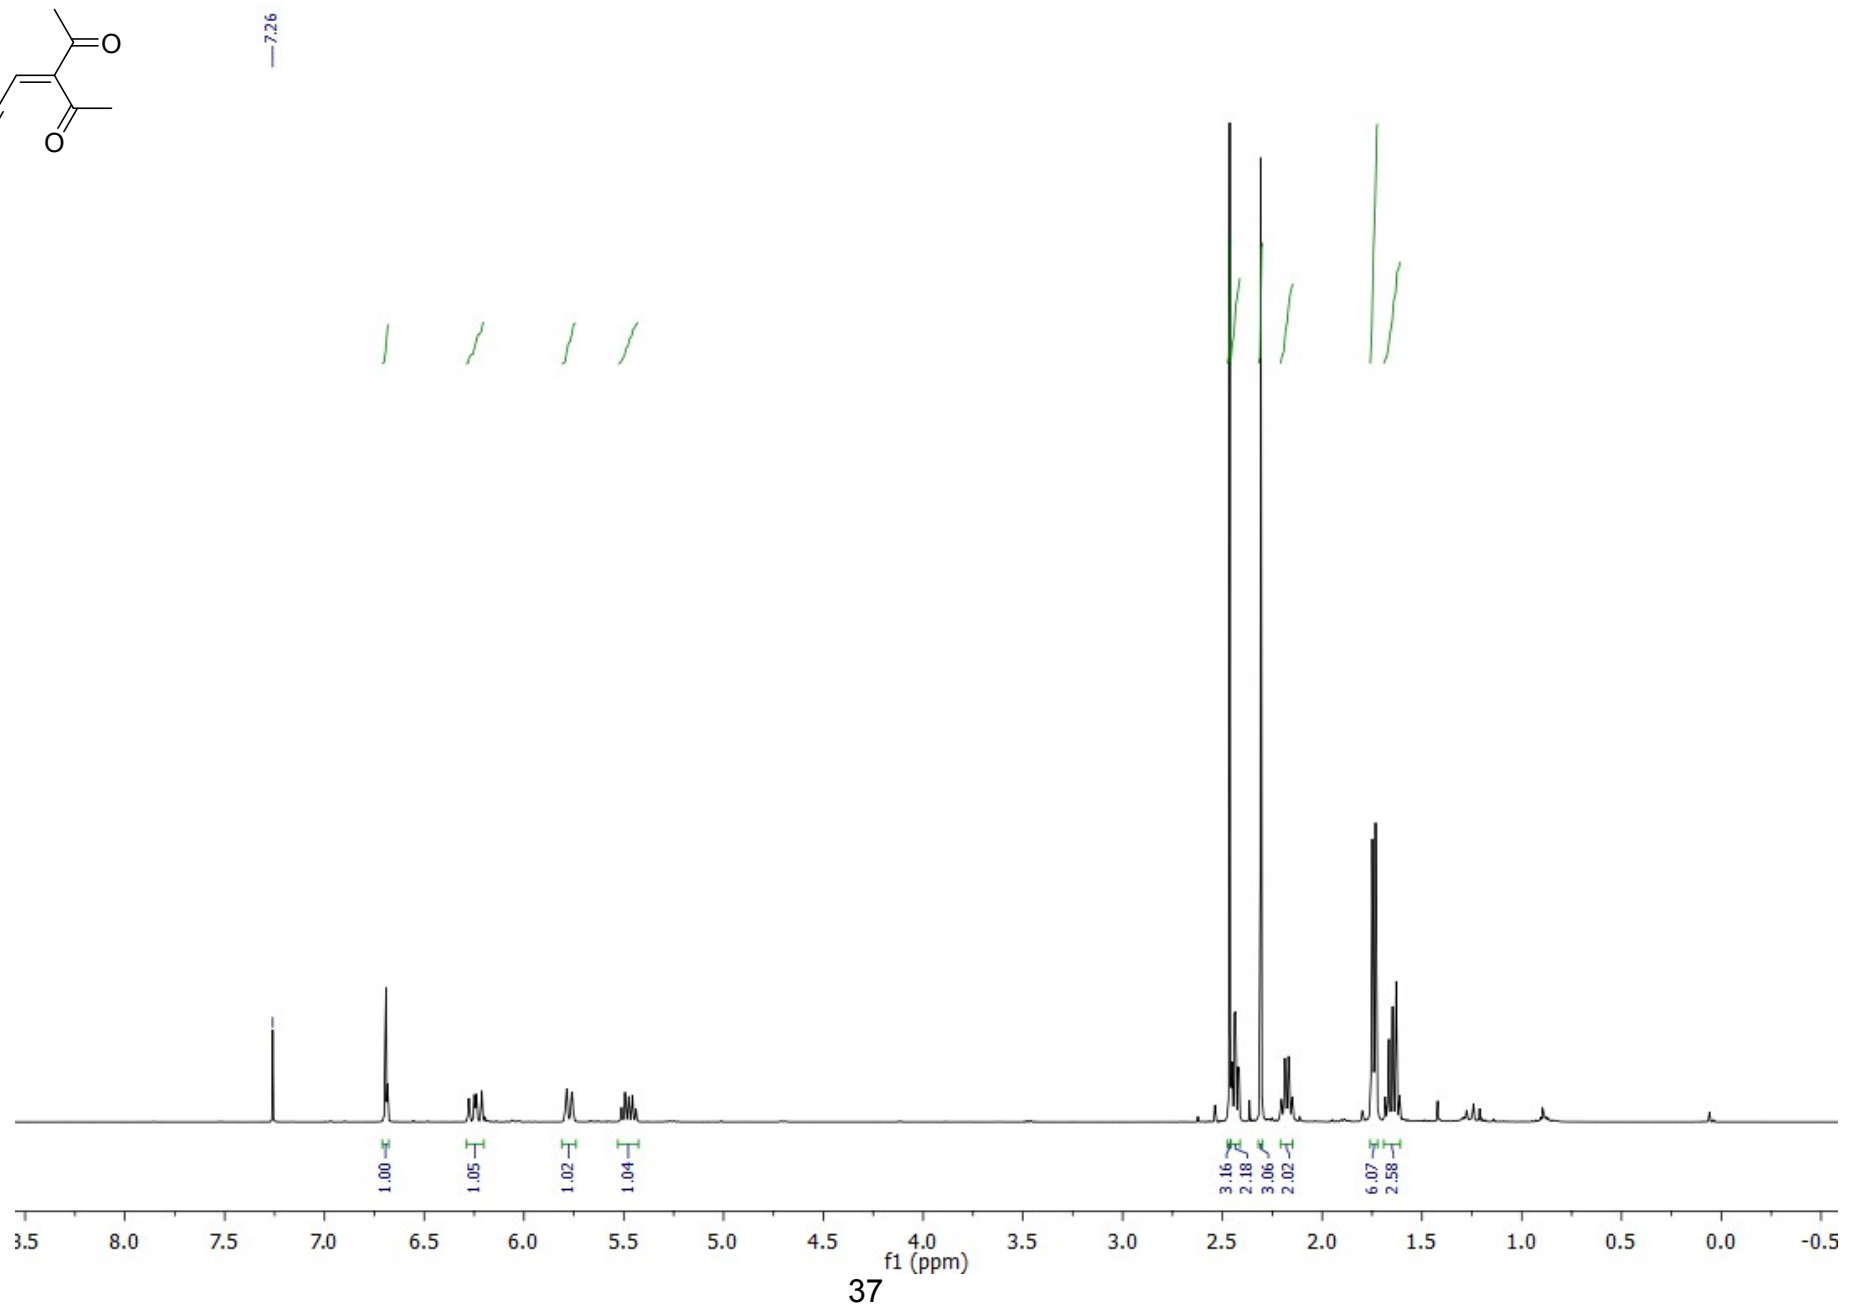

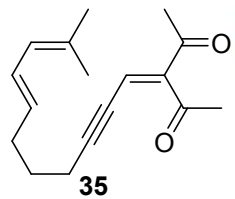

— 201.40

— 195.91

— 149.70

— 133.84

— 129.84

— 128.16

— 124.88

— 123.31

— 110.22

— 77.20

— 32.00

— 31.09

— 28.11

— 27.35

— 26.03

— 19.75

— 18.37

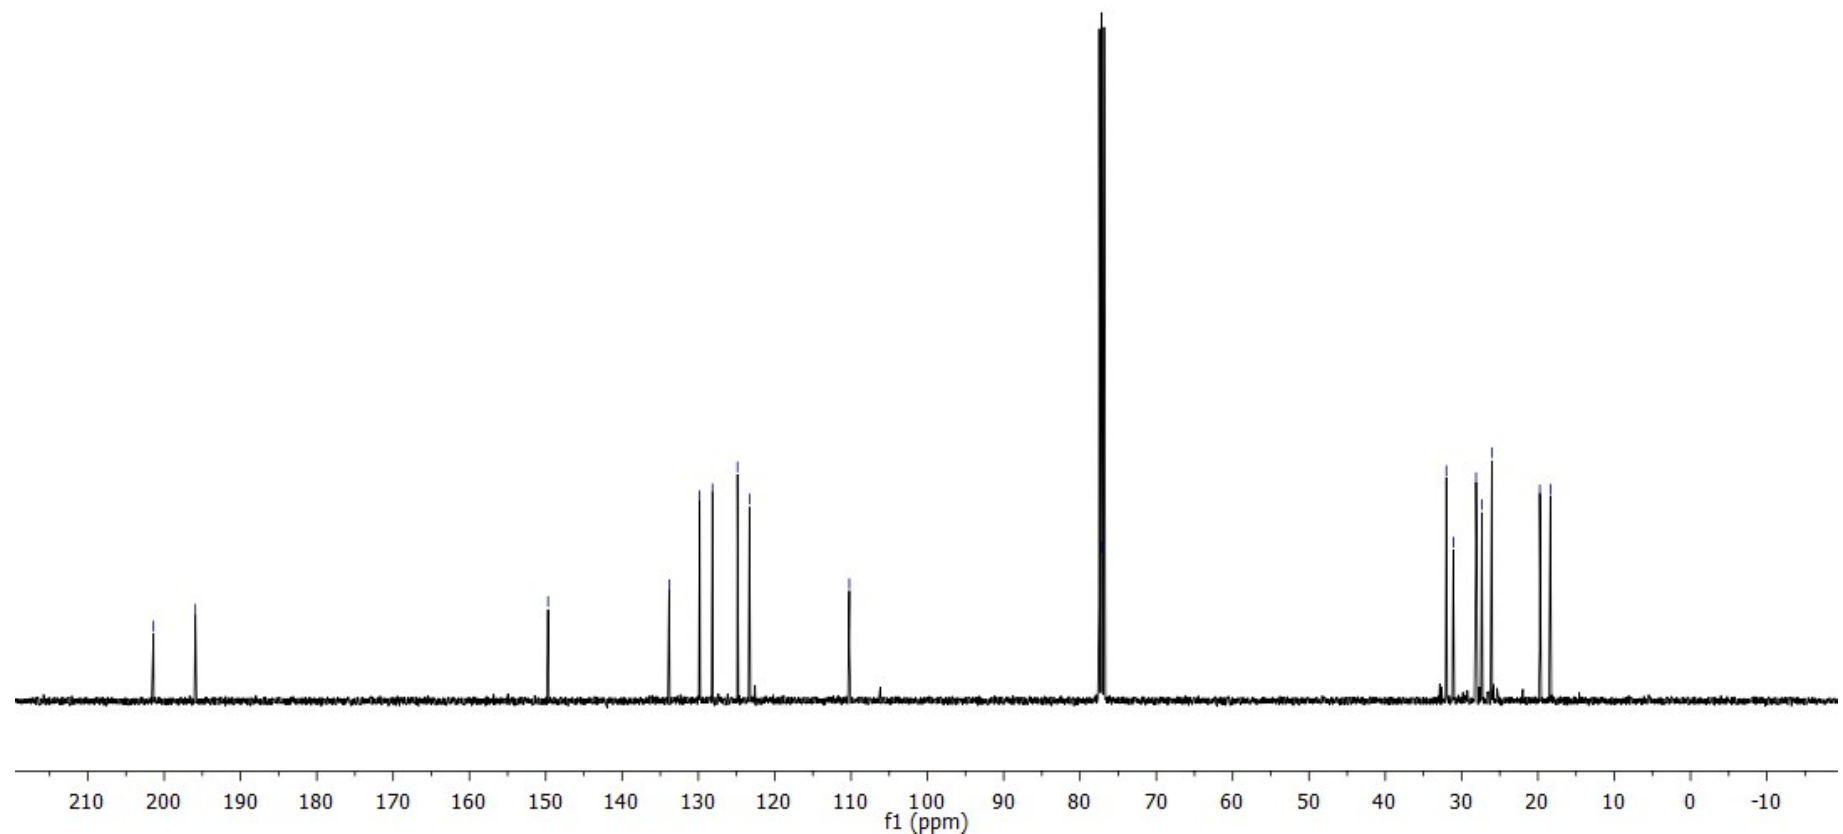

38

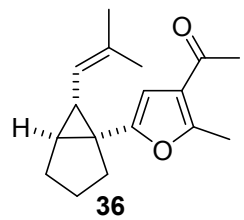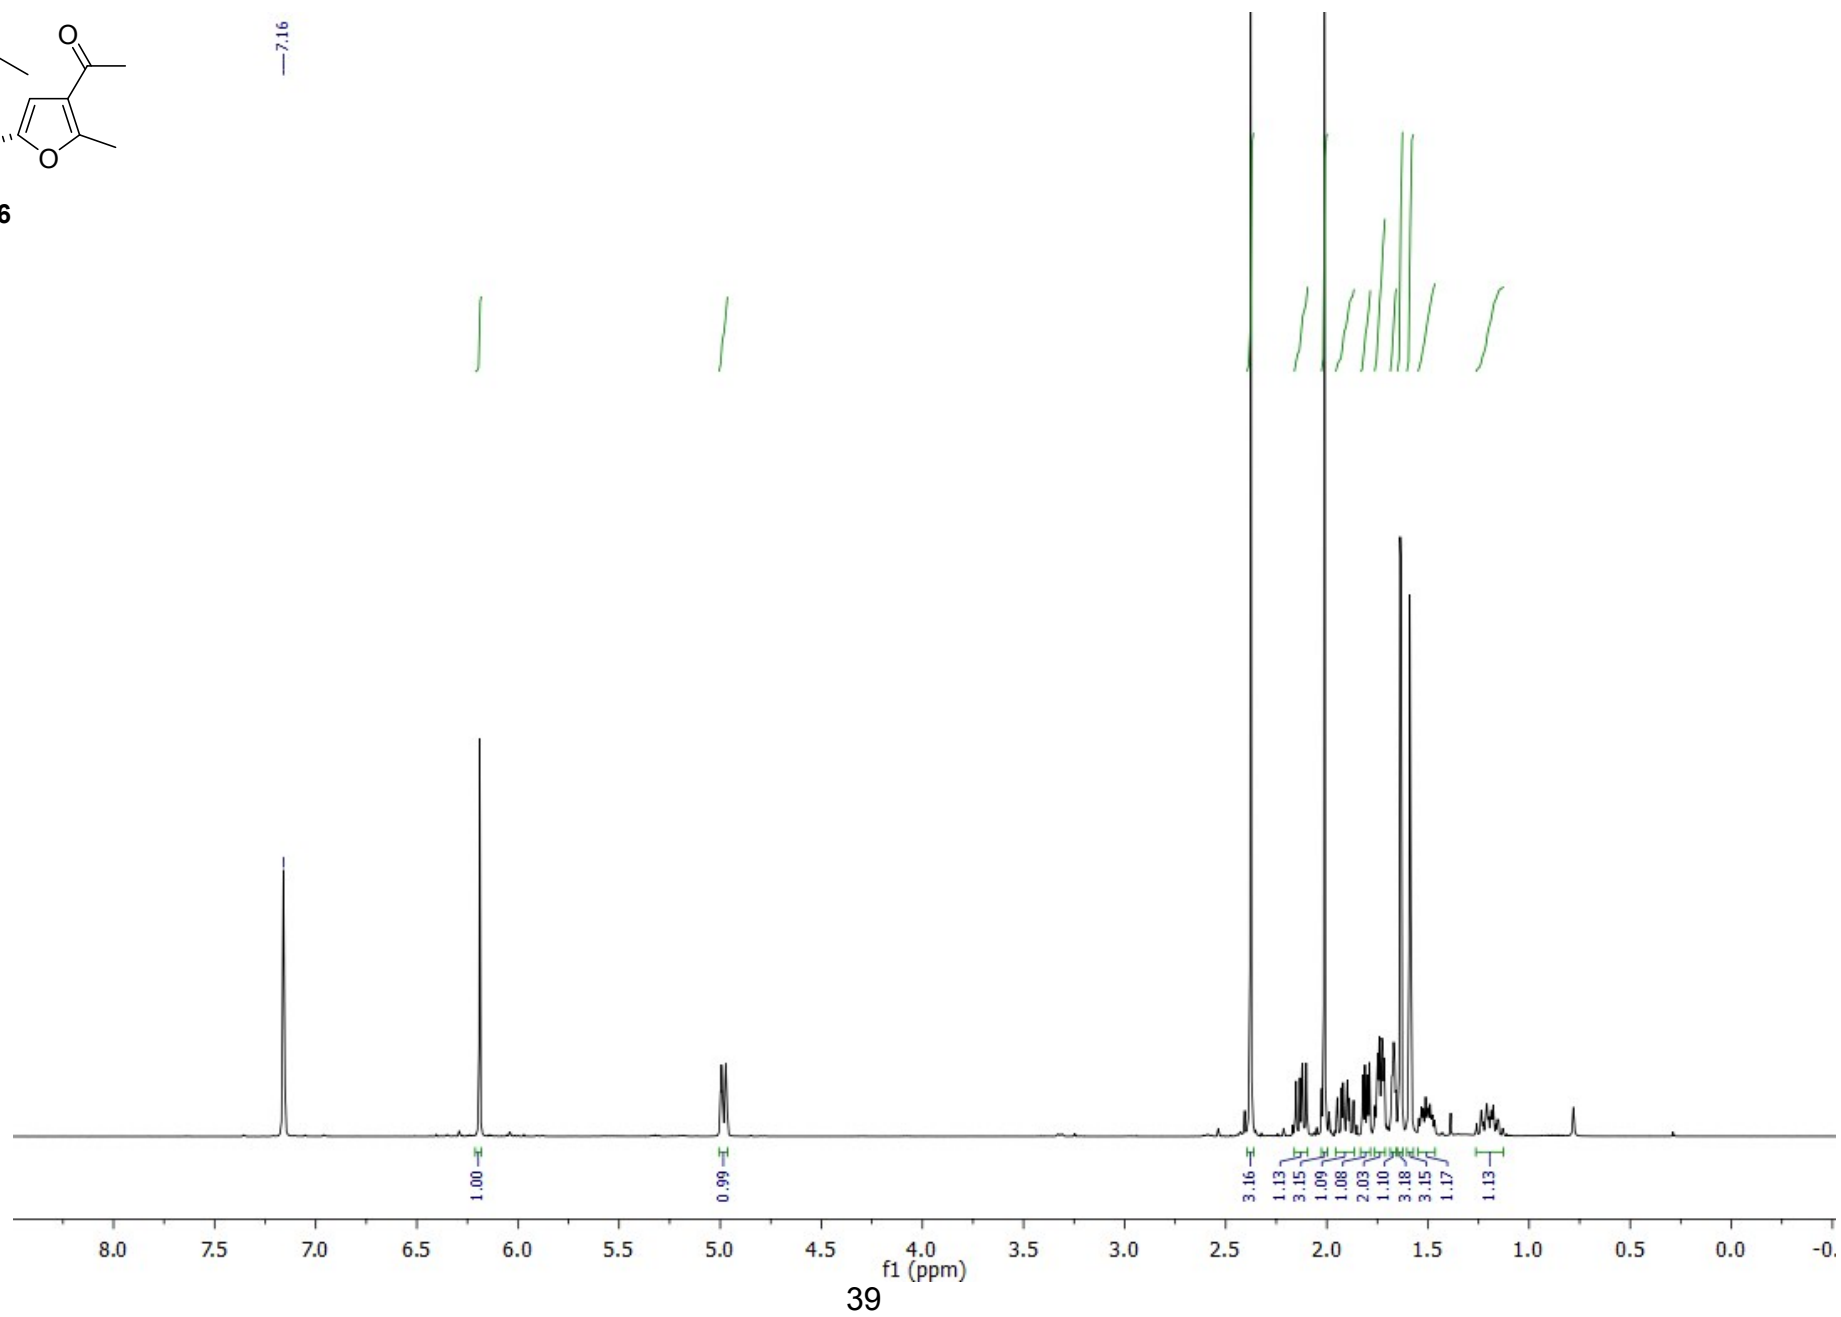

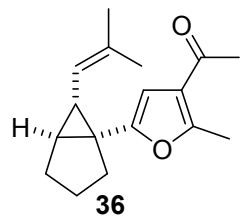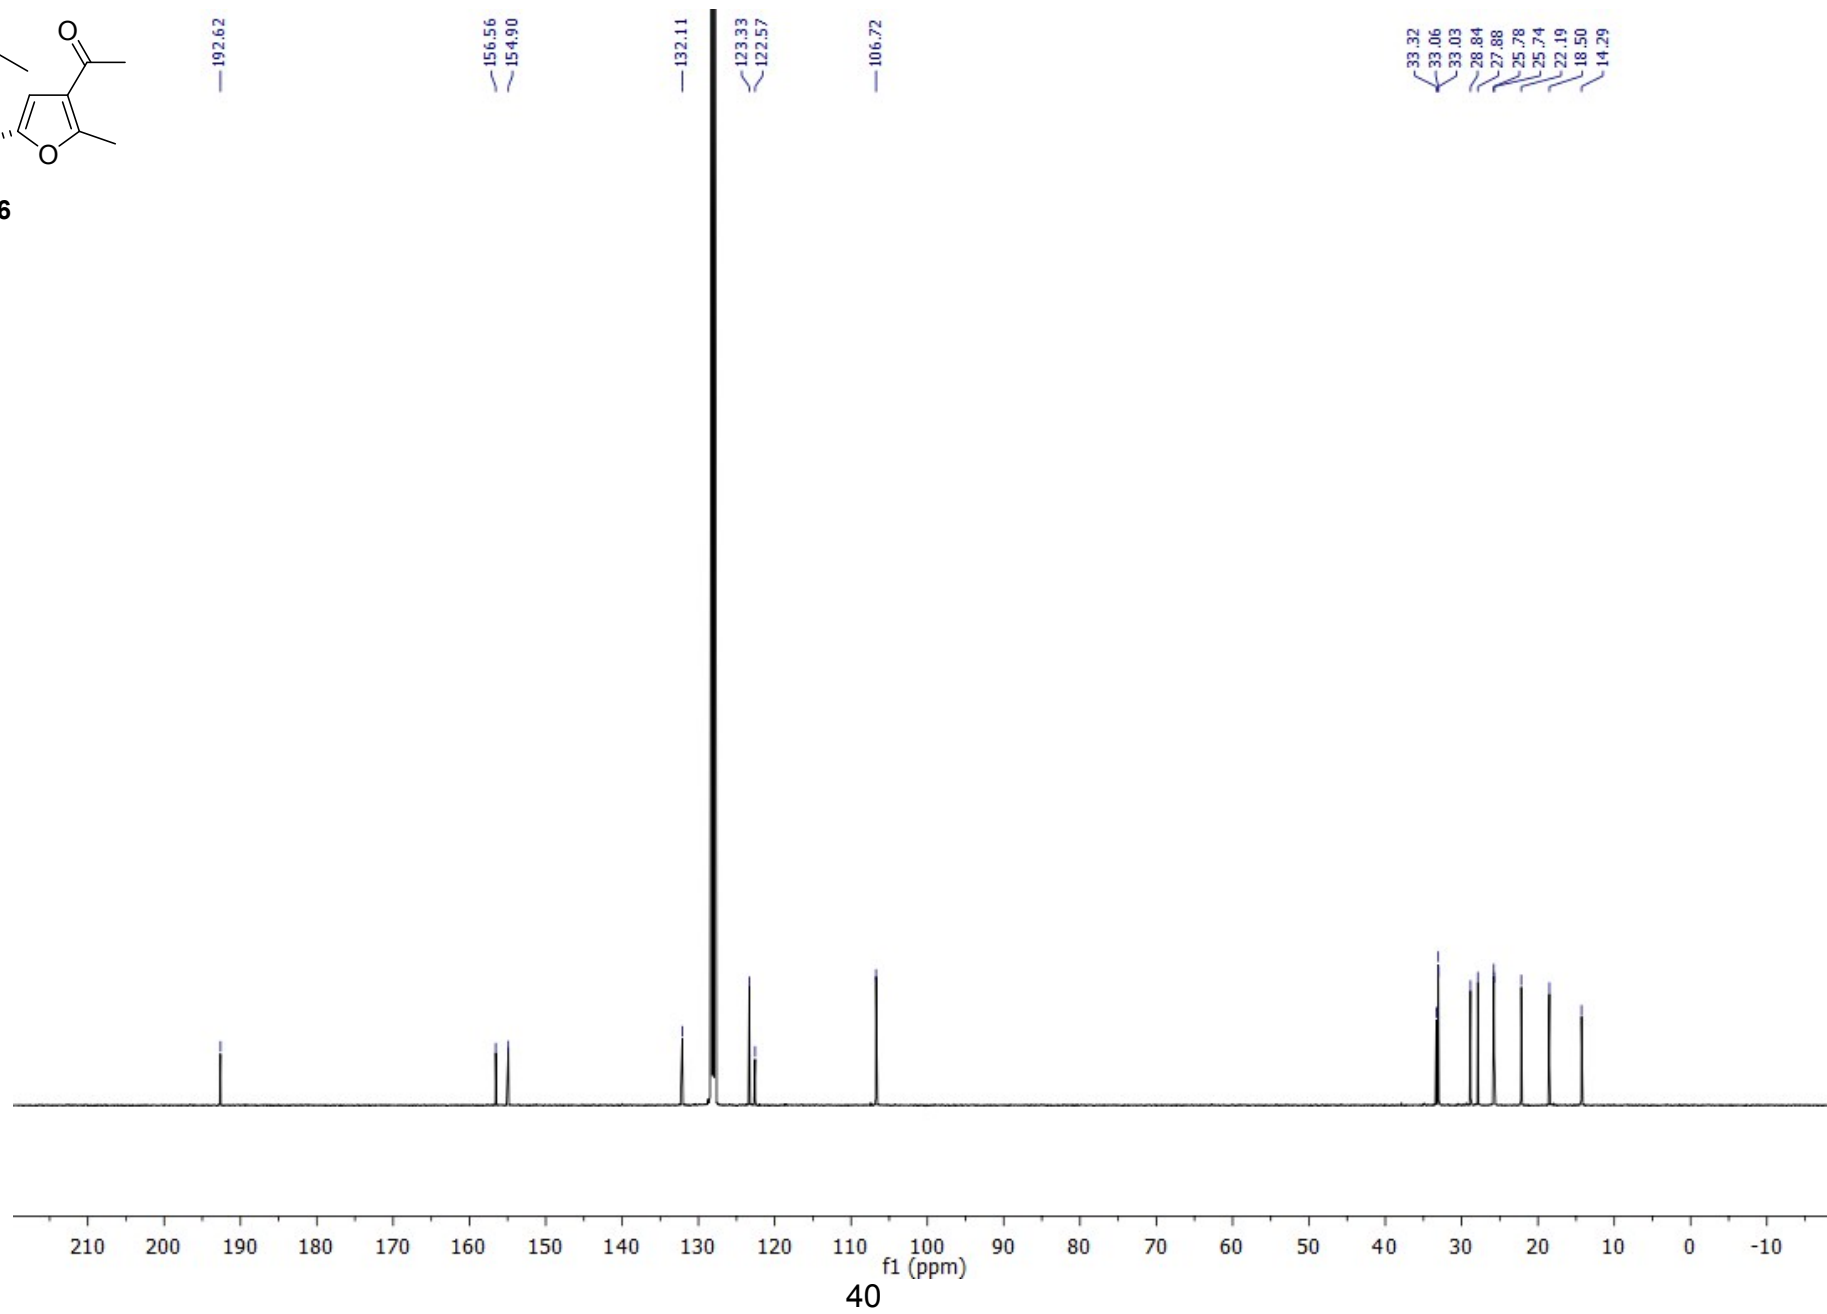



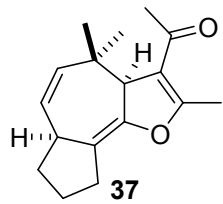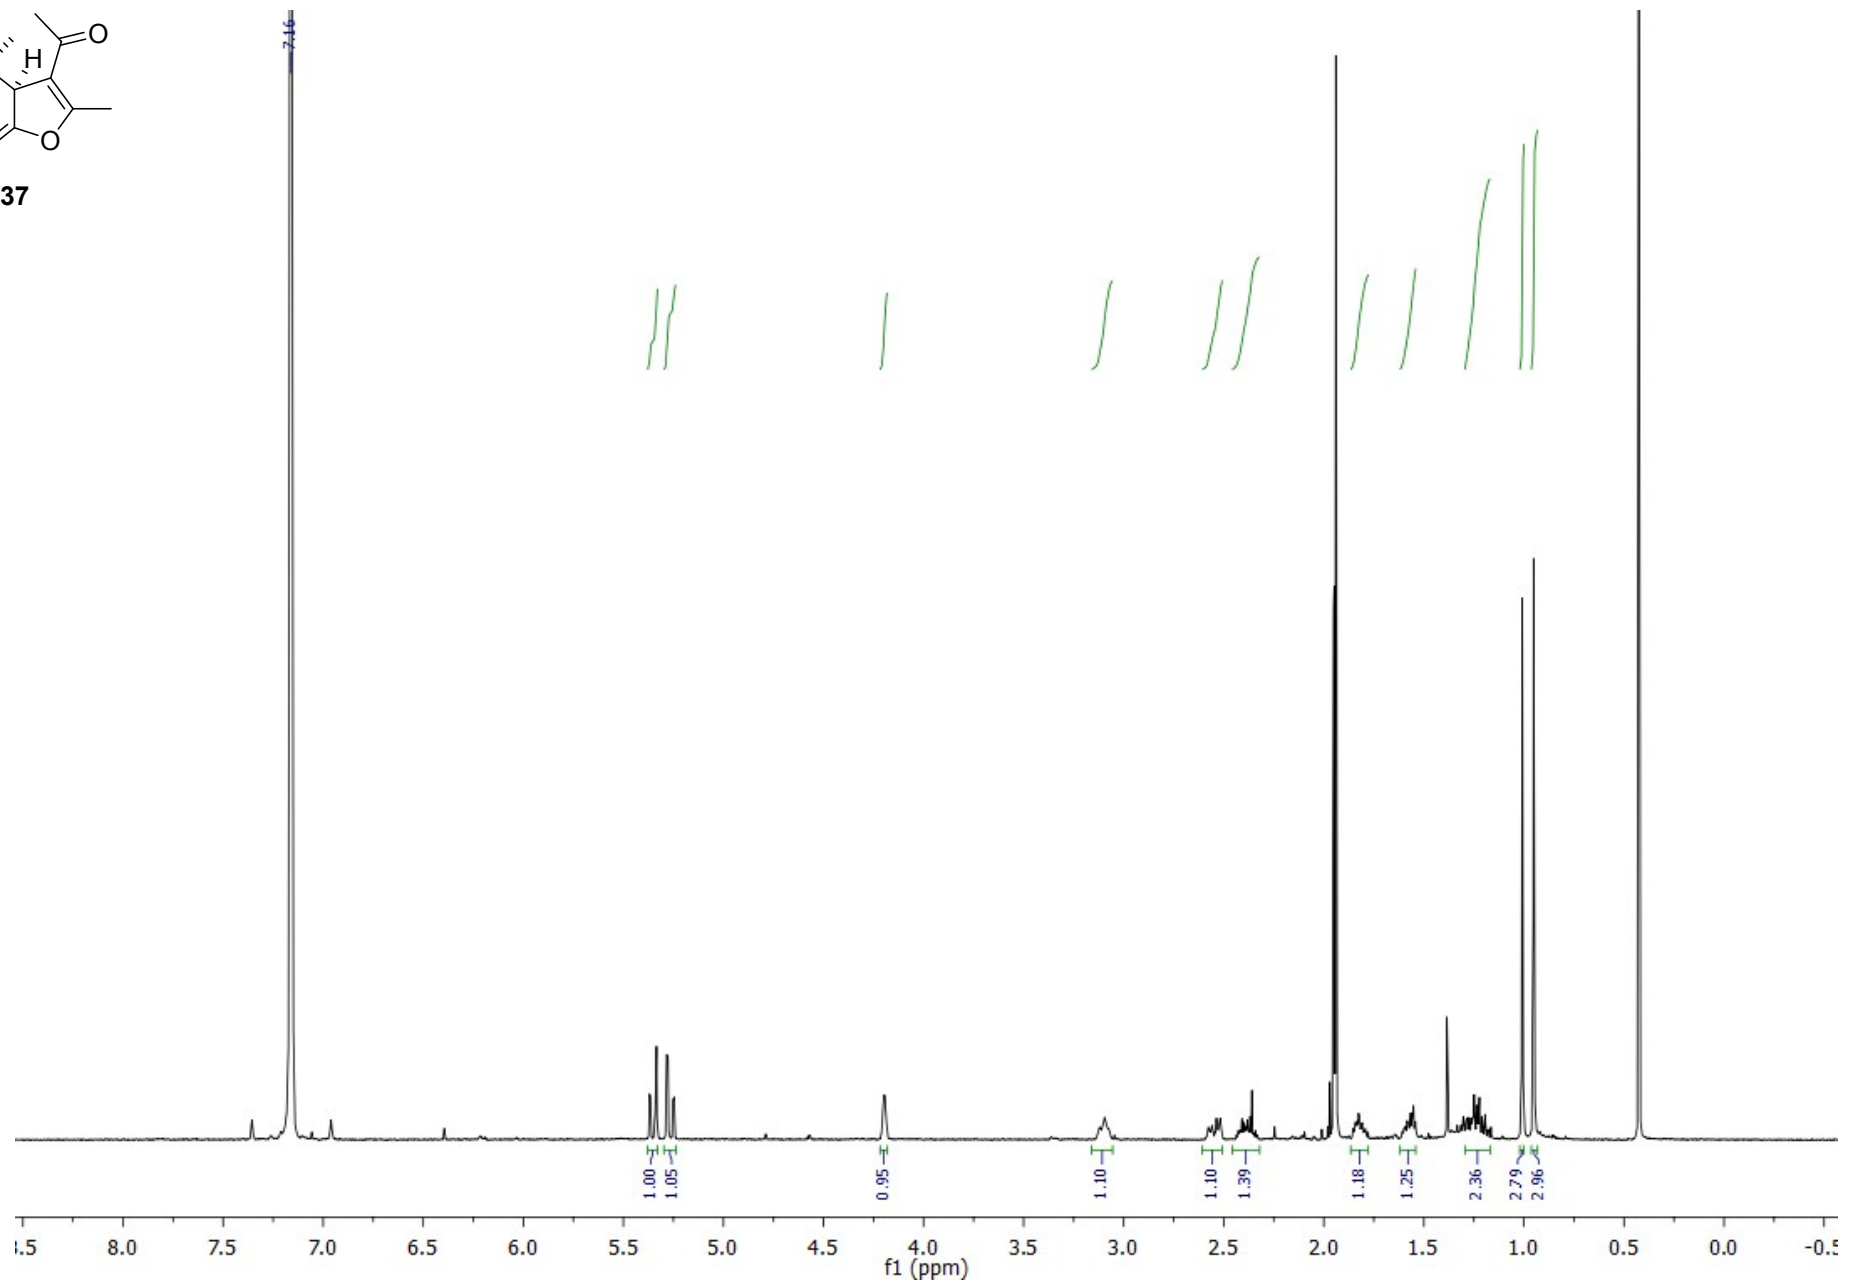

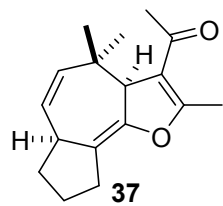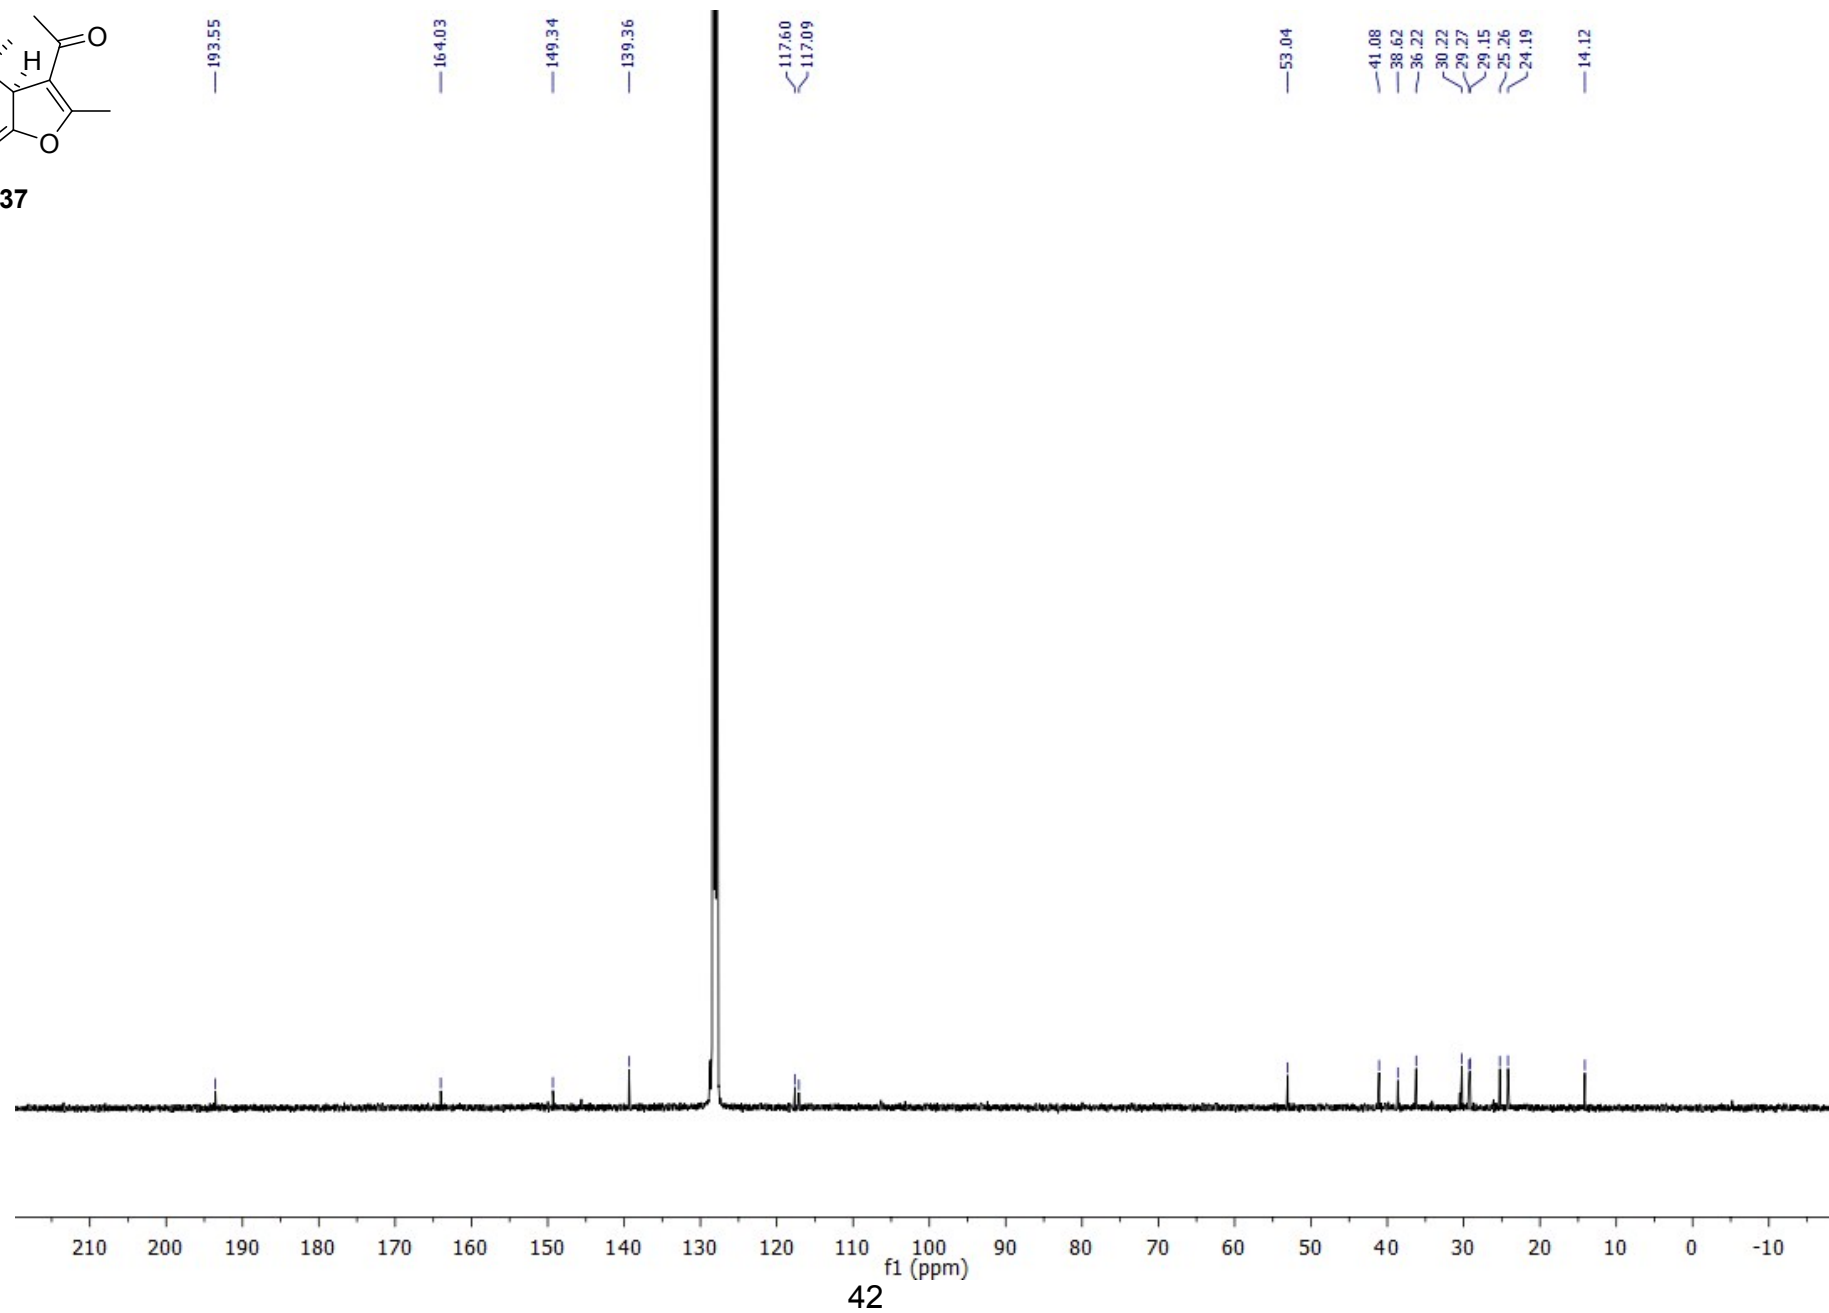

Supplement: c8ob00924d1.pdf [file c8ob00924d1.pdf]
